# Supplementary material for: Patient and public involvement to inform the protocol of a clinical trial comparing total hip arthroplasty with exercise: an exploratory qualitative case study
Source: PubMed Central journal article supplement — BMJ Open. 2023 Apr 24;13(4):e070866. doi: 10.1136/bmjopen-2022-070866 (PMC10151957; doi:10.1136/bmjopen-2022-070866), 2023-04-24
Supplement: bmjopen-2022-070866.draft_revisions.pdf [file bmjopen-2022-070866.draft_revisions.pdf]

# BMJ Open

BMJ Open is committed to open peer review. As part of this commitment we make the peer review history of every article we publish publicly available.

When an article is published we post the peer reviewers' comments and the authors' responses online. We also post the versions of the paper that were used during peer review. These are the versions that the peer review comments apply to.

The versions of the paper that follow are the versions that were submitted during the peer review process. They are not the versions of record or the final published versions. They should not be cited or distributed as the published version of this manuscript.

BMJ Open is an open access journal and the full, final, typeset and author-corrected version of record of the manuscript is available on our site with no access controls, subscription charges or pay-per-view fees (<http://bmjopen.bmj.com>).

If you have any questions on BMJ Open's open peer review process please email [info.bmjopen@bmj.com](mailto:info.bmjopen@bmj.com)

# BMJ Open

## Patient and public involvement to inform the protocol of a clinical trial comparing total hip arthroplasty with exercise: A qualitative study

|                               |                                                                                                                                                                                                                                                                                                                                                                                                                                                                                                                                                                                                                                                                                                                                                                                                                                                                                                                                                                                                                                                                                    |
|-------------------------------|------------------------------------------------------------------------------------------------------------------------------------------------------------------------------------------------------------------------------------------------------------------------------------------------------------------------------------------------------------------------------------------------------------------------------------------------------------------------------------------------------------------------------------------------------------------------------------------------------------------------------------------------------------------------------------------------------------------------------------------------------------------------------------------------------------------------------------------------------------------------------------------------------------------------------------------------------------------------------------------------------------------------------------------------------------------------------------|
| Journal:                      | <i>BMJ Open</i>                                                                                                                                                                                                                                                                                                                                                                                                                                                                                                                                                                                                                                                                                                                                                                                                                                                                                                                                                                                                                                                                    |
| Manuscript ID                 | bmjopen-2022-070866                                                                                                                                                                                                                                                                                                                                                                                                                                                                                                                                                                                                                                                                                                                                                                                                                                                                                                                                                                                                                                                                |
| Article Type:                 | Original research                                                                                                                                                                                                                                                                                                                                                                                                                                                                                                                                                                                                                                                                                                                                                                                                                                                                                                                                                                                                                                                                  |
| Date Submitted by the Author: | 07-Dec-2022                                                                                                                                                                                                                                                                                                                                                                                                                                                                                                                                                                                                                                                                                                                                                                                                                                                                                                                                                                                                                                                                        |
| Complete List of Authors:     | Frydendal, Thomas; Lillebaelt Hospital - University Hospital of Southern Denmark, Department of Physiotherapy; University of Southern Denmark, Department of Clinical Research<br>Thomsen , Kristine; Lillebaelt Hospital - University Hospital of Southern Denmark, Department of Physiotherapy<br>Mechlenburg, Inger; Aarhus University Hospital, Department of Orthopedic Surgery; Aarhus University, Department of Clinical Medicine<br>Mikkelsen, Lone Ramer; Aarhus University, Department of Clinical Medicine; Silkeborg Regional Hospital, Elective Surgery Centre, Overgaard, Søren; Bispebjerg Hospital, Department of Orthopedic Surgery and Traumatology; University of Copenhagen Faculty of Health and Medical Sciences, Department of Clinical Medicine<br>Ingwersen, Kim Gordon; Lillebaelt Hospital - University Hospital of Southern Denmark, Department of Physiotherapy; University of Southern Denmark, Department of Regional Health Research<br>Myburgh, Cornelius; University of Southern Denmark, Department of Sports Science and Clinical Biomechanics |
| Keywords:                     | Hip < ORTHOPAEDIC & TRAUMA SURGERY, QUALITATIVE RESEARCH, Musculoskeletal disorders < ORTHOPAEDIC & TRAUMA SURGERY, Clinical trials < THERAPEUTICS                                                                                                                                                                                                                                                                                                                                                                                                                                                                                                                                                                                                                                                                                                                                                                                                                                                                                                                                 |
|                               |                                                                                                                                                                                                                                                                                                                                                                                                                                                                                                                                                                                                                                                                                                                                                                                                                                                                                                                                                                                                                                                                                    |

SCHOLARONE™  
Manuscripts

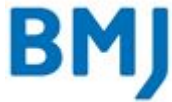

I, the Submitting Author has the right to grant and does grant on behalf of all authors of the Work (as defined in the below author licence), an exclusive licence and/or a non-exclusive licence for contributions from authors who are: i) UK Crown employees; ii) where BMJ has agreed a CC-BY licence shall apply, and/or iii) in accordance with the terms applicable for US Federal Government officers or employees acting as part of their official duties; on a worldwide, perpetual, irrevocable, royalty-free basis to BMJ Publishing Group Ltd ("BMJ") its licensees and where the relevant Journal is co-owned by BMJ to the co-owners of the Journal, to publish the Work in this journal and any other BMJ products and to exploit all rights, as set out in our [licence](#).

The Submitting Author accepts and understands that any supply made under these terms is made by BMJ to the Submitting Author unless you are acting as an employee on behalf of your employer or a postgraduate student of an affiliated institution which is paying any applicable article publishing charge ("APC") for Open Access articles. Where the Submitting Author wishes to make the Work available on an Open Access basis (and intends to pay the relevant APC), the terms of reuse of such Open Access shall be governed by a Creative Commons licence – details of these licences and which [Creative Commons](#) licence will apply to this Work are set out in our licence referred to above.

Other than as permitted in any relevant BMJ Author's Self Archiving Policies, I confirm this Work has not been accepted for publication elsewhere, is not being considered for publication elsewhere and does not duplicate material already published. I confirm all authors consent to publication of this Work and authorise the granting of this licence.

1  
2  
3  
4 **Article Type:** Original research article  
5  
6  
7  
8

9 **Patient and public involvement to inform the protocol of a clinical trial**  
10  
11 **comparing total hip arthroplasty with exercise: A qualitative study**  
12

13 Thomas Frydendal, PT, MSc<sup>1,2,3,\*</sup>; Kristine Sloth Thomsen, PT, MSc<sup>1</sup>; Inger  
14 Mechlenburg, PhD, DMSc<sup>4,5</sup>; Lone Ramer Mikkelsen, PhD<sup>5,6</sup>; Søren Overgaard, MD,  
15 DMSc<sup>7,8,9</sup>; Kim Gordon Ingwersen, PhD<sup>1,3,10</sup>; Corrie Myburgh, PhD<sup>11,12</sup>  
16  
17  
18  
19

20  
21 <sup>1</sup>Department of Physiotherapy, Lillebaelt Hospital – University Hospital of Southern Denmark, Vejle Hospital,  
22 Denmark

23 <sup>2</sup>Department of Clinical Research, University of Southern Denmark, Odense, Denmark.

24 <sup>3</sup>Section for Biostatistics and Evidence-Based Research, the Parker Institute, Bispebjerg and Frederiksberg Hospital,  
25 Copenhagen, Denmark

26 <sup>4</sup>Department of Orthopedic Surgery, Aarhus University Hospital, Aarhus, Denmark

27 <sup>5</sup>Department of Clinical Medicine, Aarhus University, Aarhus, Denmark

28 <sup>6</sup>Elective Surgery Centre, Silkeborg Regional Hospital, Silkeborg, Denmark

29 <sup>7</sup>Department of Orthopedic Surgery and Traumatology, Copenhagen University Hospital, Bispebjerg Hospital,  
30 Copenhagen, Denmark

31 <sup>8</sup>Department of Clinical Medicine, Faculty of Health and Medical Sciences University of Copenhagen, Copenhagen,  
32 Denmark

33 <sup>9</sup>Department of Orthopedic Surgery and Traumatology, Odense University Hospital, Odense, Denmark

34 <sup>10</sup>Department of Regional Health Research, University of Southern Denmark, Odense, Denmark

35 <sup>11</sup>Department of Sport Science and Clinical Biomechanics, University of Southern Denmark, Odense, Denmark

36 <sup>12</sup>The Chiropractic Knowledge Hub, Odense, Denmark  
37  
38  
39  
40  
41  
42  
43

44 **Manuscript Word Count:** 4295 words; **Abstract Word Count:** 263 words; **Number**  
45 **of Tables/Figures:** 5 Tables/Figures  
46  
47  
48  
49  
50

51 **\*Corresponding Author:** Address for correspondence to Thomas Frydendal, PT, MSc,  
52 Vejle Hospital, Beriderbakken 4, 7100 Vejle, Denmark. E-mail:  
53 thomas.frydendal@rsyd.dk. Phone: +45 79 40 61 51.  
54  
55  
56  
57  
58  
59  
60

## ABSTRACT

**Objective:** To explore patient, clinician, and decision maker perceptions on a clinical trial evaluating the effectiveness of total hip arthroplasty (THA) compared with exercise to inform the trial protocol.

**Design and Methods:** This is a qualitative study using a constructivistic paradigm. Participants were enrolled into three key stakeholder groups: patients eligible for THA, clinicians, and decision makers. Focus group interviews were conducted according to group status using open-ended semi-structured interview guides. Interviews were recorded, transcribed verbatim, and thematic analysed.

**Results:** We conducted 6 focus group interviews comprising 14 patients, 4 clinicians (2 orthopaedic surgeons and 2 physiotherapists), and 4 decision makers. Two main themes emerged. *'Perceptions that may influence the management of hip osteoarthritis'* covered three supporting codes: Treatment without surgery is unlikely to lead to recovery; Clinician authority impacts the management narrative; The 'surgery versus exercise' debate. *'Considerations for a trial protocol in the current Danish healthcare context'* highlighted three supporting codes: Who is considered eligible for surgery; Facilitators and barriers for a clinical trial comparing surgery and exercise; Most important and meaningful outcomes for patients with hip osteoarthritis.

**Conclusions:** Patients and clinicians had beliefs and perceptions on the management of hip osteoarthritis that may lead to sampling bias during enrolment procedures, treatment crossovers, and reduced generalizability of our clinical trial. Therefore, we included a

1  
2  
3  
4 parallel observational study investigating the generalizability, developed an enrolment  
5  
6 procedure using generic guidance and balanced narrative conveyed by an independent  
7  
8 clinician to facilitate communication of clinical equipoise, and adopted change in hip  
9  
10 pain and function as the primary outcome to improve methodological rigorousness of  
11  
12 our trial protocol.  
13  
14  
15  
16  
17

## 18 **STRENGTHS AND LIMITATIONS OF THIS STUDY**

- 21 • This qualitative patient and public involvement study was used to inform the  
22  
23 protocol of a randomised controlled trial evaluating the effectiveness of total hip  
24  
25 arthroplasty compared with exercise.  
26
- 27 • Focus group interviews were performed with patients, clinicians, and decision  
28  
29 makers to provide multiple perspectives and extend the scope of the findings.  
30  
31
- 32 • An independent researcher conducted the data analysis to decrease the  
33  
34 possibility of interpretation bias.  
35  
36
- 37 • One focus group interview was conducted for each of the groups with clinicians  
38  
39 and decision makers due to pragmatic reasons reducing the likelihood of data  
40  
41 saturation in these two groups.  
42  
43
- 44 • All participants in the patient group were scheduled for total hip arthroplasty and  
45  
46 3 out of 14 had previously undergone this procedure, which may have  
47  
48 influenced their perceptions.  
49  
50  
51  
52

### 53 **Keywords**

54  
55 Hip Osteoarthritis, Total Hip Arthroplasty, Exercise, Patient and Public Involvement,  
56  
57 Qualitative Study  
58  
59  
60

## INTRODUCTION

Hip osteoarthritis (OA) is a major cause of pain, disability, and decreased quality-of-life<sup>1</sup>. The overall prevalence of hip OA is 11%,<sup>2</sup> and the disorder is the leading reason for undergoing total hip arthroplasty (THA) surgery.<sup>3</sup> The number of THAs performed each year has increased dramatically over the past decade with more than one million procedures annually undertaken worldwide.<sup>3</sup> THA is considered an effective treatment to reduce pain, improve physical function, and increase quality-of-life for severe hip OA.<sup>4,5</sup> However, there is a risk of severe complications and up to 23% of the patients report long-term residual pain after THA surgery.<sup>3,6</sup>

Guidelines recommend exercise and patient education as first-line treatment in the management of hip OA.<sup>7,8</sup> Specifically, progressive resistance training (PRT) appears to provide moderate improvements in patient-reported outcomes and functional performance even in patients with severe hip OA.<sup>9,10</sup> Furthermore, exercise and patient education might postpone the need for surgery and reduce patients' willingness to undergo THA,<sup>11,12</sup> but less than 40% of the patients are recommended or referred to first-line treatment.<sup>13</sup> Despite the large number of THA surgeries performed annually, no clinical trial has investigated the comparative effectiveness of THA and non-surgical treatment in the management of hip OA.<sup>14</sup> This comparison is of importance as non-surgical treatment has been shown to be a viable alternative to surgery for many musculoskeletal disorders.<sup>15</sup>

Several clinician and patient barriers to participation in clinical trials have been identified. Main clinician barriers comprise lack of support staff and inadequate research training and difficulty with the consent procedure, while notable patient barriers include treatment preferences, worry caused by uncertainty, and concerns about

1  
2  
3  
4 information and consent.<sup>16</sup> Moreover, clinical trials comparing surgical procedures with  
5  
6 non-surgical treatment have suffered from low enrolment rates and difficulties in  
7  
8 retaining participants to their allocated treatments.<sup>17-21</sup> With limited participation in  
9  
10 these sort of clinical trials a risk exists for research inefficiency and possibly biased  
11  
12 findings that may drive clinical decision making.<sup>22</sup>  
13  
14

15  
16 Patient and public involvement (PPI) strategies involve key stakeholders  
17  
18 in the design, conduct, and dissemination of research.<sup>23 24</sup> Evidence suggests that PPI  
19  
20 strategies have the potential to increase enrolment rates of participants and improve  
21  
22 selection of outcome measures.<sup>23 24</sup> However, only few clinical trials within the  
23  
24 orthopaedic area have reported use of PPI,<sup>25</sup> although more than 90% of the authors of  
25  
26 surgical trials claim some incorporation of PPI.<sup>23</sup> Thus, based on the benefits and  
27  
28 paucity of current evidence in this area effective PPI strategies may help optimize  
29  
30 clinical trials comparing surgery to non-surgical treatment.  
31  
32

33  
34 To our knowledge, this is the first qualitative PPI study preceding a  
35  
36 clinical trial comparing surgical to non-surgical treatment as previous trials did not  
37  
38 report any engagement from patients and other key stakeholders.<sup>17-21</sup> Therefore, we  
39  
40 aimed to explore patient, clinician, and decision maker perceptions on a clinical trial  
41  
42 evaluating the effectiveness of THA compared with exercise to inform the trial protocol.  
43  
44  
45  
46  
47

## 48 **METHODS**

### 49 **Study design**

50  
51 We used an explorative qualitative design based on a constructivistic paradigm as data  
52  
53 was co-constructed by the researchers and participants.<sup>26</sup> This study was reported in  
54  
55 agreement with the Consolidated Criteria for Reporting Qualitative Research (COREQ)  
56  
57  
58  
59  
60



1  
2  
3  
4 checklist,<sup>27</sup> and preceded the Progressive Resistance Training Versus Total Hip  
5  
6 Arthroplasty (PROHIP) trial.<sup>28</sup> The PROHIP trial was approved by The Regional  
7  
8 Committees on Health Research Ethics for Southern Denmark (Project-ID: S-  
9  
10 20180158) and registered on ClinicalTrials.gov (NCT04070027). This study was  
11  
12 approved by The Danish Data Protection Agency (Journal No 18/23994), while no  
13  
14 ethical approval was required according to the Danish Act on Research Ethics. Written  
15  
16 informed consent was obtained from each participant in accordance with the Helsinki  
17  
18 Declaration.  
19  
20  
21  
22  
23  
24

### 25 **Sampling and participants**

26  
27 Participants were enrolled into three key stakeholder groups: patients, clinicians  
28  
29 (orthopaedic surgeons and physiotherapists), and decision makers (**Figure 1**). Key  
30  
31 stakeholders were engaged at the level of consultation to obtain input on several  
32  
33 research decisions and implement the findings into our trial protocol<sup>29</sup>.  
34  
35  
36  
37  
38

39 *Please insert Figure 1 about here*  
40  
41  
42

43 Patients were recruited consecutively by orthopaedic surgeons from the  
44  
45 orthopaedic departments at Vejle Hospital and Odense University Hospital. The  
46  
47 eligibility criteria was similar to the PROHIP trial to ensure a typical patient response<sup>28</sup>.  
48  
49 Briefly, eligible patients were aged  $\geq 50$  years, diagnosed with clinical and radiographic  
50  
51 hip OA, and considered eligible for THA.  
52  
53

54 A convenience sample of clinicians not involved in the design of the  
55  
56 PROHIP trial with  $>2$  years of clinical experience in treating patients with hip OA from  
57  
58  
59  
60

1  
2  
3  
4 the orthopaedic and physiotherapy departments at the two hospitals were contacted  
5  
6 personally face-to-face or by email and invited to participate in the study.  
7

8  
9 A purposive sample of decision makers with >2 years of political  
10  
11 experience from the spectrum of political parties and relevant non-governmental  
12  
13 organisations from the Region of Southern Denmark were approached by email and  
14  
15 invited to participate in the study.  
16  
17

### 18 19 20 **Data collection**

21  
22 Data were collected through open-ended, semi-structured focus group interviews  
23  
24 allowing the advantage of dynamic group interactions.<sup>30</sup> Each interview included two to  
25  
26 five key stakeholders, lasted between 90 to 120 minutes, and was conducted from  
27  
28 September 2018 to March 2019 by a female physiotherapist (KST), MSc with 10 years  
29  
30 of clinical orthopaedic experience and trained in qualitative methodologies. Prior to  
31  
32 each focus group interview, the interviewers' profession was disclosed to the key  
33  
34 stakeholders. The interviewer was neither affiliated with the PROHIP trial group nor  
35  
36 had previous interaction with key stakeholders. Group specific open-ended semi-  
37  
38 structured interview guides (**online Supplementary File 1**) were developed by the first  
39  
40 author (TF) to explore topics related to the PROHIP trial.<sup>31</sup> The number of focus group  
41  
42 interviews were not predetermined for the patients, whereas one interview was planned  
43  
44 for the clinicians and decision makers due to pragmatic reasons. For the patients, the  
45  
46 semi-structured interview guide was continuously adjusted after each focus group based  
47  
48 on field notes made during the interviews by the first author. Data saturation was  
49  
50 considered attained, if no new themes, perspectives, and knowledge developed within  
51  
52 two consecutive interviews. All interviews were digitally audio-recorded, transcribed  
53  
54  
55  
56  
57  
58  
59  
60

1  
2  
3  
4 verbatim, and translated into English by an independent linguist. The transcripts and  
5  
6 findings were not returned to the key stakeholders for comments. All data were pseudo-  
7  
8 anonymized and stored in digital format on a password-protected hospital server  
9  
10 conforming to current data protection standards. The focus group interviews were  
11  
12 performed face-to-face in undisturbed conference rooms at Vejle Hospital and Odense  
13  
14 University Hospital, according to group status. The interviewer and the first author were  
15  
16 present during all focus group interviews.  
17  
18  
19

20  
21 Key stakeholder characteristics were obtained using a participant-reported  
22  
23 questionnaire. Additionally, the patient group completed the Oxford Hip Score (OHS)<sup>32</sup>  
24  
25 and Hip disability and Osteoarthritis Outcome Score (HOOS).<sup>33</sup>  
26  
27  
28  
29

### 30 **Data analysis**

31  
32 An independent qualitative researcher (CM) not affiliated with the PROHIP trial group  
33  
34 conducted a thematic analysis to explore and identify patterns of meaning across the  
35  
36 data set using an inductive approach with no predetermined themes.<sup>34</sup> This process  
37  
38 involved coding and then abstracting connected data to common themes. Initially, line-  
39  
40 by-line inductive coding was performed on interviews to define and develop a code list.  
41  
42 Then the code list was used to code subsequent interviews deductively. However,  
43  
44 according to the constant comparison method, new codes may emerge and will again be  
45  
46 applied across all interviews.<sup>35</sup> Related codes were also further organized into code  
47  
48 families. As the analysis progressed, coding shifted from descriptive to explanatory,  
49  
50 resulting in a number of axial codes. Finally, a thematic network was developed.<sup>36</sup> The  
51  
52 analysis was performed using Computer Assisted Qualitative Data Analysis software  
53  
54 (CAQDAS, Atlas Ti, Version 8).  
55  
56  
57  
58  
59  
60

### Implementation of findings into the trial protocol

After the data analysis was completed, findings were presented to the PROHIP trial group for implementation consideration. We assessed the feasibility of findings for implementation into the trial protocol and categorized these across relevant emerging domains. Disagreements were resolved by discussion until consensus.

### Patient and public involvement

Patients or members of the public were not involved in the design, conduct, reporting or dissemination of this qualitative study, but constituted the PPI strategy used in the development of the PROHIP trial.<sup>28</sup>

## RESULTS

We conducted 6 focus group interviews with 14 patients, 4 clinicians (2 orthopaedic surgeons and 2 physiotherapists), and 4 decision makers (**online Supplementary File 2**). Participant characteristics are presented in **Table 1**. Two main themes emerged from the thematic framework. *'Perceptions that may influence the management of hip osteoarthritis'* covered three supporting codes: Treatment without surgery is unlikely to lead to recovery; Clinician authority impacts the management narrative; The 'surgery versus exercise' debate. *'Considerations for a trial protocol in the current Danish healthcare context'* highlighted three supporting codes: Who is considered eligible for surgery; Facilitators and barriers for a clinical trial comparing surgery and exercise; Most important and meaningful outcomes for patients with hip osteoarthritis. (**Figure 2**).

**Table 1.** Characteristics of the Key Stakeholder Groups.\*

| Characteristic                                         | Patients<br>(N=14) | Clinicians<br>(N=4) | Decision Makers<br>(N=4) |
|--------------------------------------------------------|--------------------|---------------------|--------------------------|
| Female sex — no. (%)                                   | 8 (57)             | 1 (25)              | 2 (50)                   |
| Age — yr                                               | 68.5 [51.0-80.0]   | 48.0 [38.00-52.00]  | 56.5 [23.0-68.0]         |
| Height — m                                             | 1.72 [1.62-1.80]   | -                   | -                        |
| Weight — kg                                            | 73.8 [61.0-100.0]  | -                   | -                        |
| Body-mass index — kg/m <sup>2</sup>                    | 24.5 [20.2-31.3]   | -                   | -                        |
| Duration of hip symptoms‡ — yr                         | 2.3 [0.3-10.0]     | -                   | -                        |
| Clinical and radiographic hip osteoarthritis — no. (%) | 14 (100)           | 0 (0)               | 0 (0)                    |
| Previous total hip arthroplasty — no. (%)              | 3 (21)             | 0 (0)               | 0 (0)                    |
| OHS§                                                   | 21.5 [10.0-38.0]   | -                   | -                        |
| HOOS subscale scores¶                                  |                    |                     |                          |
| Pain                                                   | 42.5 [20.0-77.5]   | -                   | -                        |
| Symptoms                                               | 32.5 [15.0-80.0]   | -                   | -                        |
| Function in activities of daily living                 | 47.8 [20.6-86.8]   | -                   | -                        |
| Hip-related quality of life                            | 31.3 [12.5-68.8]   | -                   | -                        |
| Function in sports and recreation                      | 25.0 [0-62.5]      | -                   | -                        |
| Clinical profession — no. (%)                          |                    |                     |                          |
| Orthopaedic surgeon                                    | -                  | 2 (50)              | -                        |
| Physiotherapist                                        | -                  | 2 (50)              | -                        |
| Clinical experience — yr                               | -                  | 16.0 [3.0-18.0]     | -                        |
| Hospital affiliation — no. (%)                         |                    |                     |                          |
| Vejle Hospital                                         | -                  | 2 (50)              | -                        |
| Odense University Hospital                             | -                  | 2 (50)              | -                        |
| Political experience — yr                              | -                  | -                   | 5.0 [3.0-5.0]            |
| Political affiliation — no. (%)                        |                    |                     |                          |
| The Liberal Party of Denmark (V)                       | -                  | -                   | 1 (25)                   |
| The Danish People's Party (O)                          | -                  | -                   | 1 (25)                   |
| The Social Democratic Party (A)                        | -                  | -                   | 1 (25)                   |
| The Danish Rheumatism Association                      | -                  | -                   | 1 (25)                   |

\* Values are median [range] unless otherwise indicated.

‡ Two patients had missing values.

§ The Oxford Hip Score (OHS) ranges from 0 to 48, with higher scores indicating better disease status.

¶ For all five subscales, the Hip disability and Osteoarthritis Outcome Score (HOOS) ranges from 0 to 100, with higher scores indicating better disease status.

*Please insert Figure 2 about here*

## Perceptions that may influence the management of hip osteoarthritis

*Treatment without surgery is unlikely to lead to recovery*

Patients had high expectations of a complete reduction of hip pain, fast return to desired activities-of-daily-living and functional performance approximating their pre-symptomatic state after THA surgery.

*'I find it important to get rid of the pain, but also to get back to being physically active. Those two are equally important to me. I think. Because it used to be such a big part of my life' (Patient 3, age 60-69 years).*

Patients had uncertain and/or sceptical expectations about exercise, but believed that exercise could lead to improvements.

*'I have not been informed about the possibility of exercising the pain away' (Patient 5, age 70-79 years).*

Patients and decisions makers perceived exercise as a more appropriate treatment for mild to moderate stages of hip OA or as an adjunct to THA in the pre- and/or postoperative phases to improve the outcome of THA.

*'But if a hip is in a better state, then there is still a possibility to improve the person's condition without surgery. At the early stages of hip deterioration, exercise may seem like the best way forward' (Decision maker 3, age 60-69).*

1  
2  
3  
4  
5  
6  
7 *'It is important to do exercise both before and after the surgery, to make*  
8 *your muscles as powerful as possible'* (Patient 1, age 60-69 years).  
9  
10

11  
12  
13 Patients with severe hip pain perceived themselves as highly disabled and considered  
14 any treatment without THA surgery unlikely to lead to their recovery.  
15  
16  
17

18  
19  
20 *'Having a defect hip is constraining both physically and mentally. Totally*  
21 *disabling.'* (Patient 6, age 60-69 years).  
22  
23  
24

25  
26  
27 *'I don't believe that it is possible to remove the symptoms just by means of*  
28 *exercising. I don't believe that is possible'* (Patient 7, age 50-59 years).  
29  
30  
31

#### 32 33 34 *Clinician authority impacts the management narrative*

35  
36 Patients expressed a need to be guided verbally through the trial protocol and  
37 information by a competent and trustworthy clinician. In this regard, the orthopaedic  
38 surgeons were seen as the most authoritative clinician.  
39  
40  
41  
42  
43

44  
45 *'When I consulted the orthopaedic surgeon, the doctor. We were told*  
46 *absolutely everything about it [THA surgery], and he does it very well.*  
47  
48 *There was no doubt in my mind'* (Patient 5, age 70-79 years).  
49  
50  
51

52  
53  
54 Orthopaedic surgeons tended to describe THA as a core treatment, with exercise being  
55 considered as a postsurgical adjunct treatment, and thus reinforced the perception of  
56  
57  
58  
59  
60

1  
2  
3  
4 their status as the most authoritative clinician group by virtue of their control over the  
5  
6  
7  
8  
9  
10  
11  
12  
13  
14  
15  
16  
17  
18  
19  
20  
21  
22  
23  
24  
25  
26  
27  
28  
29  
30  
31  
32  
33  
34  
35  
36  
37  
38  
39  
40  
41  
42  
43  
44  
45  
46  
47  
48  
49  
50  
51  
52  
53  
54  
55  
56  
57  
58  
59  
60

their status as the most authoritative clinician group by virtue of their control over the  
THA treatment narrative.

*'It is quite clearly "the surgery of the century". If the surgery is made on the right patient, it is both a safe and effective surgery. The degree of satisfaction is generally very high, both seen from the patients and the surgeons' perspectives' (Clinician [Orthopaedic surgeon 2], age 40-49 years).*

Patient respondents highlighted that both orthopaedic surgeons and physiotherapist tended to use a management narrative suited to their preferred treatment and at times these narratives were juxtaposed.

*'The orthopaedic surgeon said: You can get a new hip, but I suggest you try to exercise for a period and then you can return to me when the pain gets too severe. The physiotherapists, they are very eager avoid surgery. At least the ones I have met, they have told me that I can exercise the pain away' (Patient 2, age 50-59 years).*

Clinicians were aware of the potential impact of their authority on patient perceptions of treatment effectiveness. This practice was viewed with concern as the PROHIP trial relies on trial participants perceiving THA and exercise as equal treatments.



1  
2  
3  
4 *'It is possible to talk about the different possibilities in a fairly objective*  
5 *way through a standardized text. And then it is important not to laugh...*  
6  
7 *when the patient asks us, what would you choose?'* (Clinician  
8  
9  
10  
11 [Orthopaedic surgeon 2], age 40-49 years).  
12  
13  
14

### 15 *The 'surgery versus exercise' debate*

16  
17 Clinicians were aware of an ongoing discourse, pitching other surgical procedures and  
18  
19 exercise against one another. Both the orthopaedic surgeons and physiotherapists agreed  
20  
21 that fuelling a debate of choosing one approach over another was not a desirable in the  
22  
23 context of the PROHIP trial.  
24  
25  
26  
27  
28  
29

30 *'This became quickly exercise against surgery, very much head-to-head*  
31 *and completely out of context of reality. We did not recognize, nor in the*  
32 *media the picture they created with the interpretation that you should*  
33 *rather exercise or carelessly get surgery'* (Clinician [Physiotherapist 2],  
34  
35  
36  
37  
38  
39  
40  
41  
42  
43  
44  
45  
46  
47  
48  
49  
50  
51  
52  
53  
54  
55  
56  
57  
58  
59  
60  
age 30-39 years).

61  
62  
63  
64  
65  
66  
67  
68  
69  
70  
71  
72  
73  
74  
75  
76  
77  
78  
79  
80  
81  
82  
83  
84  
85  
86  
87  
88  
89  
90  
91  
92  
93  
94  
95  
96  
97  
98  
99  
100  
101  
102  
103  
104  
105  
106  
107  
108  
109  
110  
111  
112  
113  
114  
115  
116  
117  
118  
119  
120  
121  
122  
123  
124  
125  
126  
127  
128  
129  
130  
131  
132  
133  
134  
135  
136  
137  
138  
139  
140  
141  
142  
143  
144  
145  
146  
147  
148  
149  
150  
151  
152  
153  
154  
155  
156  
157  
158  
159  
160  
161  
162  
163  
164  
165  
166  
167  
168  
169  
170  
171  
172  
173  
174  
175  
176  
177  
178  
179  
180  
181  
182  
183  
184  
185  
186  
187  
188  
189  
190  
191  
192  
193  
194  
195  
196  
197  
198  
199  
200  
201  
202  
203  
204  
205  
206  
207  
208  
209  
210  
211  
212  
213  
214  
215  
216  
217  
218  
219  
220  
221  
222  
223  
224  
225  
226  
227  
228  
229  
230  
231  
232  
233  
234  
235  
236  
237  
238  
239  
240  
241  
242  
243  
244  
245  
246  
247  
248  
249  
250  
251  
252  
253  
254  
255  
256  
257  
258  
259  
260  
261  
262  
263  
264  
265  
266  
267  
268  
269  
270  
271  
272  
273  
274  
275  
276  
277  
278  
279  
280  
281  
282  
283  
284  
285  
286  
287  
288  
289  
290  
291  
292  
293  
294  
295  
296  
297  
298  
299  
300  
301  
302  
303  
304  
305  
306  
307  
308  
309  
310  
311  
312  
313  
314  
315  
316  
317  
318  
319  
320  
321  
322  
323  
324  
325  
326  
327  
328  
329  
330  
331  
332  
333  
334  
335  
336  
337  
338  
339  
340  
341  
342  
343  
344  
345  
346  
347  
348  
349  
350  
351  
352  
353  
354  
355  
356  
357  
358  
359  
360  
361  
362  
363  
364  
365  
366  
367  
368  
369  
370  
371  
372  
373  
374  
375  
376  
377  
378  
379  
380  
381  
382  
383  
384  
385  
386  
387  
388  
389  
390  
391  
392  
393  
394  
395  
396  
397  
398  
399  
400  
401  
402  
403  
404  
405  
406  
407  
408  
409  
410  
411  
412  
413  
414  
415  
416  
417  
418  
419  
420  
421  
422  
423  
424  
425  
426  
427  
428  
429  
430  
431  
432  
433  
434  
435  
436  
437  
438  
439  
440  
441  
442  
443  
444  
445  
446  
447  
448  
449  
450  
451  
452  
453  
454  
455  
456  
457  
458  
459  
460  
461  
462  
463  
464  
465  
466  
467  
468  
469  
470  
471  
472  
473  
474  
475  
476  
477  
478  
479  
480  
481  
482  
483  
484  
485  
486  
487  
488  
489  
490  
491  
492  
493  
494  
495  
496  
497  
498  
499  
500  
501  
502  
503  
504  
505  
506  
507  
508  
509  
510  
511  
512  
513  
514  
515  
516  
517  
518  
519  
520  
521  
522  
523  
524  
525  
526  
527  
528  
529  
530  
531  
532  
533  
534  
535  
536  
537  
538  
539  
540  
541  
542  
543  
544  
545  
546  
547  
548  
549  
550  
551  
552  
553  
554  
555  
556  
557  
558  
559  
560  
561  
562  
563  
564  
565  
566  
567  
568  
569  
570  
571  
572  
573  
574  
575  
576  
577  
578  
579  
580  
581  
582  
583  
584  
585  
586  
587  
588  
589  
590  
591  
592  
593  
594  
595  
596  
597  
598  
599  
600  
601  
602  
603  
604  
605  
606  
607  
608  
609  
610  
611  
612  
613  
614  
615  
616  
617  
618  
619  
620  
621  
622  
623  
624  
625  
626  
627  
628  
629  
630  
631  
632  
633  
634  
635  
636  
637  
638  
639  
640  
641  
642  
643  
644  
645  
646  
647  
648  
649  
650  
651  
652  
653  
654  
655  
656  
657  
658  
659  
660  
661  
662  
663  
664  
665  
666  
667  
668  
669  
670  
671  
672  
673  
674  
675  
676  
677  
678  
679  
680  
681  
682  
683  
684  
685  
686  
687  
688  
689  
690  
691  
692  
693  
694  
695  
696  
697  
698  
699  
700  
701  
702  
703  
704  
705  
706  
707  
708  
709  
710  
711  
712  
713  
714  
715  
716  
717  
718  
719  
720  
721  
722  
723  
724  
725  
726  
727  
728  
729  
730  
731  
732  
733  
734  
735  
736  
737  
738  
739  
740  
741  
742  
743  
744  
745  
746  
747  
748  
749  
750  
751  
752  
753  
754  
755  
756  
757  
758  
759  
760  
761  
762  
763  
764  
765  
766  
767  
768  
769  
770  
771  
772  
773  
774  
775  
776  
777  
778  
779  
780  
781  
782  
783  
784  
785  
786  
787  
788  
789  
790  
791  
792  
793  
794  
795  
796  
797  
798  
799  
800  
801  
802  
803  
804  
805  
806  
807  
808  
809  
810  
811  
812  
813  
814  
815  
816  
817  
818  
819  
820  
821  
822  
823  
824  
825  
826  
827  
828  
829  
830  
831  
832  
833  
834  
835  
836  
837  
838  
839  
840  
841  
842  
843  
844  
845  
846  
847  
848  
849  
850  
851  
852  
853  
854  
855  
856  
857  
858  
859  
860  
861  
862  
863  
864  
865  
866  
867  
868  
869  
870  
871  
872  
873  
874  
875  
876  
877  
878  
879  
880  
881  
882  
883  
884  
885  
886  
887  
888  
889  
890  
891  
892  
893  
894  
895  
896  
897  
898  
899  
900  
901  
902  
903  
904  
905  
906  
907  
908  
909  
910  
911  
912  
913  
914  
915  
916  
917  
918  
919  
920  
921  
922  
923  
924  
925  
926  
927  
928  
929  
930  
931  
932  
933  
934  
935  
936  
937  
938  
939  
940  
941  
942  
943  
944  
945  
946  
947  
948  
949  
950  
951  
952  
953  
954  
955  
956  
957  
958  
959  
960  
961  
962  
963  
964  
965  
966  
967  
968  
969  
970  
971  
972  
973  
974  
975  
976  
977  
978  
979  
980  
981  
982  
983  
984  
985  
986  
987  
988  
989  
990  
991  
992  
993  
994  
995  
996  
997  
998  
999  
1000

Rather than pitching the two treatments against one another, an orthopaedic surgeon highlighted that it was important to develop a narrative emphasizing surgery and exercise as fundamentally different, yet complementary.

52 *'But the question is whether surgery and exercise can be considered*  
53 *equal. Because surgery is dangerous, exercise is not very dangerous.*  
54  
55  
56  
57 *Surgery is invasive, irreversible. Exercise is something you try out, and if*  
58  
59  
60

1  
2  
3  
4 *it does not work, then you can have surgery'* (Clinician [Orthopaedic  
5  
6 surgeon 2], age 40-49 years)  
7  
8  
9

## 10 11 **Considerations for a trial protocol in the current Danish healthcare context**

12  
13 *Who is considered eligible for surgery?*

14  
15  
16 Patients highlighted variations in the nature of hip OA, and perceived that radiographic  
17  
18 findings were the primary indication criteria for determining treatment selection.  
19

20  
21  
22  
23 *'If a person is in pain and has a lot of cartilage left, then this person*  
24  
25 *should be offered exercise and surgery should be postponed.* (Patient 1,  
26  
27 age 60-69 years).  
28

29  
30  
31  
32 Physiotherapists questioned the indication criteria for THA used in the clinical  
33  
34 assessment, since they had observed a substantial variation in hip pain and functional  
35  
36 performance among patients prior to surgery.  
37

38  
39  
40  
41 *'At the information meetings, we see people who walk normally, and we*  
42  
43 *then wonder why these people need new hips, because this person does not*  
44  
45 *seem to be in pain, nor to be functionally impaired'* (Clinician  
46  
47 [Physiotherapist 1], age 50-59 years).  
48  
49

50  
51  
52 For orthopaedic surgeons, improvements from exercise was associated with an incorrect  
53  
54 diagnosis or considered as secondary to hip OA.  
55  
56  
57  
58  
59  
60

1  
2  
3  
4                   ‘You need to be absolutely certain that the patient suffers from  
5  
6                   osteoarthritis. I believe that the patients who experience improvements by  
7  
8                   exercise, they suffer from a problem with the soft tissue. Something they  
9  
10                  have had in any circumstances or is secondary to the osteoarthritis’  
11  
12  
13                  (Clinician [Orthopaedic surgeon 1], age 50-59 years).  
14  
15  
16  
17

### 18                  *Facilitators and barriers for a clinical trial comparing surgery and exercise*

19  
20                  Based on responses, it seemed that younger patients were less likely to select surgery as  
21  
22                  first-line management. This appeared to be driven by health beliefs and concerns for the  
23  
24                  durability of THA. Patients perceived both THA and exercise as treatments to provide  
25  
26                  pain management without usage of analgesics. However, THA was clearly seen as a  
27  
28                  means to abolish severe pain, whereas less clarity was observed for exercise as residual  
29  
30                  hip pain was viewed as both a driver and barrier for continued adherence. Exercise was  
31  
32                  considered a low-risk treatment, while THA was perceived as a last resort treatment  
33  
34                  with a risk of serious adverse events. Patients indicated that improvements derived from  
35  
36                  exercise would encourage to continued adherence, whereas a failure of exercise to  
37  
38                  provide sufficient improvements in hip pain and activities-of-daily living were a driver  
39  
40                  for THA. Patients were more likely to undergo THA once presented with radiographic  
41  
42                  findings visualizing degenerative changes and/or progression of OA. Finally, patients  
43  
44                  considered establishing and maintaining exercise habits as important, and emphasized  
45  
46                  the importance of supervision to provide clinical expertise and motivation during  
47  
48                  exercise sessions. Potential facilitators and barriers for THA surgery and exercise in the  
49  
50                  PROHIP trial are summarized in **Table 2**.  
51  
52  
53  
54  
55  
56  
57  
58  
59  
60

**Table 2.** Facilitators and barriers for surgery and exercise in the Progressive Resistance Training Versus Total Hip Arthroplasty (PROHIP) trial.

|                     | Surgery                           | Illustrative quote(s)                                                                                                                                                                                                                                                                                          | Exercise                           | Illustrative quote(s)                                                                                                                                                                                                                                                                                                    |
|---------------------|-----------------------------------|----------------------------------------------------------------------------------------------------------------------------------------------------------------------------------------------------------------------------------------------------------------------------------------------------------------|------------------------------------|--------------------------------------------------------------------------------------------------------------------------------------------------------------------------------------------------------------------------------------------------------------------------------------------------------------------------|
| <b>Facilitators</b> | Severe hip pain                   | <i>'I am currently in a lot of pain, and I am looking forward to being released from that pain'</i> (Patient 1, age 60-69 years).                                                                                                                                                                              | Patient age                        | <i>'...people who feel too young to have hip surgery... because they see themselves as being physically active and capable of exercising the pain away'</i> (Clinician [Orthopaedic surgeon 2], age 40-49 years).                                                                                                        |
|                     | Low quality-of-life               | <i>'I cannot walk more than 100 meters, even with a cane'</i> (Patient 6, age 60-69 years).                                                                                                                                                                                                                    | Pain management without analgesics | <i>'Those four exercises are very valuable to me... I almost never take pills'</i> (Patient 2, age 50-59 years).                                                                                                                                                                                                         |
|                     | Ineffective first-line management | <i>'I have not been able to reduce my pain by means of exercise or physical activity, I need to have surgery to be able to live a tolerable life'</i> (Patient 6, age 60-69 years).                                                                                                                            | Low risk of adverse events         | <i>'It [exercise] will not harm them, and if they see improvements that is great.'</i> (Clinician [Orthopaedic surgeon 2], age 40-49 years).                                                                                                                                                                             |
|                     | Analgesics dependency             | <i>'I ate so many pills, we agreed that something had to be done'</i> (Patient 2, age 50-59 years).                                                                                                                                                                                                            | Perception of improvement          | <i>'If I was able to feel a signification improvement after the 12-weeks exercise program, then I would be motivated to continue'</i> (Patient 5, age 70-79 years).                                                                                                                                                      |
|                     |                                   | <i>'They foresee that they will not be forced to take pills and at the same time, they will get well. Therefore, they choose surgery'</i> (Clinician [Orthopaedic surgeon 2], age 40-49 years).                                                                                                                |                                    |                                                                                                                                                                                                                                                                                                                          |
|                     | Diagnostic imaging                | <i>'When I got here the second time and saw the x-rays, I saw how much cartilage had disappeared since last time – in that short period of time - I said to myself that the actual bone may be next in line. I said to myself that there was no point in waiting any longer'</i> (Patient 2, age 50-59 years). | Habitualised exercise              | <i>'Well, naturally I have spoken to other people about exercise, and I have asked them why they do not exercise, and they have a hard time getting started with it. Then I suggest that we go together, because the social aspect of it is very important, for some people at least'</i> (Patient 11, age 70-70 years). |
|                     | Loss of livelihood                | <i>'I may be rejected from the labour market because of my age, and I am not entitled to pension. So, I cannot afford not having surgery now'</i> (Patient 6, age 60-69 years).                                                                                                                                | Supervision                        | <i>'It is also beneficial to have the presence of a professional person who can inform us about how the specific exercises help you, ...where we are supposed to feel the pain if we do them correctly, which muscle is used and how to recognize this muscle'</i> (Patient 4, age 70-79 years).                         |
|                     |                                   |                                                                                                                                                                                                                                                                                                                | Context of exercise                | <i>'I would appreciate to be in a place together with a group of people,</i>                                                                                                                                                                                                                                             |

|                 |                        |                                                                                                                                                                                                                                                                                                                                                                                        |                                 |                                                                                                                                                                                                                                                                                                                                                                                                                                                                                                                |
|-----------------|------------------------|----------------------------------------------------------------------------------------------------------------------------------------------------------------------------------------------------------------------------------------------------------------------------------------------------------------------------------------------------------------------------------------|---------------------------------|----------------------------------------------------------------------------------------------------------------------------------------------------------------------------------------------------------------------------------------------------------------------------------------------------------------------------------------------------------------------------------------------------------------------------------------------------------------------------------------------------------------|
|                 |                        |                                                                                                                                                                                                                                                                                                                                                                                        |                                 | <p>where one person would instruct the others. And if you meet with a group of people several times, then you feel like being part of a community, and you can talk about the same things... That motivates me' (Patient 2, age 50-59 years).</p>                                                                                                                                                                                                                                                              |
|                 |                        |                                                                                                                                                                                                                                                                                                                                                                                        | Tracking and gamification       | <p>'It matters a lot, I think. Just like when you use a pedometer or a health app, I like that. I like to be able to see the result of my efforts... like Endomondo – get notified about having completed something' (Patient 3, age 60-69 years).</p>                                                                                                                                                                                                                                                         |
| <b>Barriers</b> | Patient age            | <p>'...the uncertainty about whether the hip will last 10, 15, 20 years, and whether I will be able to get a new replacement at that time' (Patient 2, age 50-59 years).</p> <p>'I am also concerned about the durability of the total hip arthroplasty, because wearing out an artificial hip would result in a second surgery' (Clinician [Physiotherapist 1], age 50-59 years).</p> | Too much or too little hip pain | <p>'I have to say that when you are in pain, it is easy to exercise. But then when you don't feel pain, then you tend to forget to do your exercises one day, and then next day and so on. So, when everything is fine, then I have a hard time getting motivated to do exercises' (Patient 1, age 60-69 years).</p> <p>'Some people benefit a lot from exercise, but other people come back to me and explain that exercise only worsened the pain' (Clinician [Orthopaedic surgeon 2], age 40-49 years).</p> |
|                 | Risk of adverse events | <p>'A small risk of the surgery not being successful. That the pain ends up being much worse than before. I think that we all fear that... It would be so devastating if that should happen to us' (Patient 2, age 50-59 years).</p> <p>'Well, if the result is a foot drop, then I will not consider the surgery a success' (Patient 7, age 50-59 years).</p>                         | Low motivation                  | <p>'What is bad for me is that I always come up with a good excuse for not going... working out at home does not work for me, it is better if I go to a fitness centre with other people around' (Patient 3, age 60-69 years).</p>                                                                                                                                                                                                                                                                             |
|                 |                        |                                                                                                                                                                                                                                                                                                                                                                                        | Continuity interruptions        | <p>'...doing exercises in the fitness centre. But, I have also... Maybe I have taken some breaks, I could have put more efforts into it' (Patient 3, age 60-69 years).</p>                                                                                                                                                                                                                                                                                                                                     |

1  
2  
3  
4 *Most important and meaningful outcomes for patients with hip osteoarthritis*

5  
6 Patients and clinicians indicated change in hip pain and hip function as the most  
7  
8 important outcomes to evaluate the treatment effect of surgery or exercise.  
9

10  
11  
12  
13 *‘My biggest problem is that I feel pain in all the different kinds of*  
14 *movements I do. No matter what kind of movement I do, I feel the pain’*  
15  
16  
17  
18 (Patient 12, age 50-59 years).  
19

20  
21  
22 Patients and clinicians also highlighted quality-of-life, functional performance (gait),  
23  
24 patient acceptable symptom state, muscle strength, treatment crossover (i.e. number of  
25  
26 THA surgeries in the exercise group), return-to-work, and leg-length discrepancy as  
27  
28 other meaningful outcomes to measure in the PROHIP trial.  
29  
30

31  
32  
33  
34 **Methodological implementation strategies for the trial protocol**

35  
36 Based on our data, we identified four domains for methodological implementation  
37  
38 strategies to optimize the PROHIP trial protocol, and these were: patient ‘buy in’,  
39  
40 enrolment strategies, patient information materials, and important clinical outcomes.  
41  
42

43 The domains, their thematic association and supporting coding are illustrated in **Table**

44  
45  
46 **3.**  
47  
48  
49  
50  
51  
52  
53  
54  
55  
56  
57  
58  
59  
60

**Table 3.** Methodological implications derived from the listed domains, main themes and supporting codes used to inform the Progressive Resistance Training Versus Total Hip Arthroplasty (PROHIP) trial protocol.

| Domain                      | Main theme                                                                   | Supporting code                                                               | Methodological implications for the PROHIP trial protocol                                                                                                                                                                                                                                                                                              |
|-----------------------------|------------------------------------------------------------------------------|-------------------------------------------------------------------------------|--------------------------------------------------------------------------------------------------------------------------------------------------------------------------------------------------------------------------------------------------------------------------------------------------------------------------------------------------------|
| <b>Patient 'buy in'</b>     | Perceptions that may impact the management of hip osteoarthritis             | Treatment without surgery is unlikely to lead to recovery                     | Guided implementation of a parallel observational study investigating the generalizability of the clinical trial, since many patients probably may decline participation in the trial.                                                                                                                                                                 |
|                             |                                                                              | Clinician authority impacts the management narrative                          |                                                                                                                                                                                                                                                                                                                                                        |
|                             | Considerations for a trial protocol in the current Danish healthcare context | The 'surgery versus exercise' debate                                          | Guided development of retention procedures (i.e. instructions of study personnel to encourage patient completion), statistical analysis plan (i.e. handling of missing data, sensitivity and exploratory analyses, and subgroup and causal mediation analysis), and exercise protocol (i.e. effective supervision and habitualised exercise protocol). |
|                             |                                                                              | Who is considered eligible for surgery?                                       |                                                                                                                                                                                                                                                                                                                                                        |
| <b>Enrolment strategies</b> | Perceptions that may impact the management of hip osteoarthritis             | Facilitators and barriers for a clinical trial comparing surgery and exercise | Guided development of instruction and training strategy in the enrolment procedures.                                                                                                                                                                                                                                                                   |
|                             |                                                                              | Clinician authority impacts the management narrative                          |                                                                                                                                                                                                                                                                                                                                                        |
|                             | Considerations for a trial protocol in the current Danish healthcare context | The 'surgery versus exercise' debate                                          | Guided implementation of generic guidance and neutral narrative during enrolment procedures to provide verbal information about the trial.                                                                                                                                                                                                             |
|                             |                                                                              | Who is considered eligible for surgery?                                       |                                                                                                                                                                                                                                                                                                                                                        |
|                             |                                                                              |                                                                               | Guided clinician roles in enrolment procedures (i.e. eligibility assessment, provider of trial information to the patients) and selection of an independent clinician group to provide detailed verbal information about the trial to facilitate communication of clinical equipoise.                                                                  |

|                                      |                                                                              |                                                                                                                                                                                       |                                                                                                                                                                                                                                                                                                                                                                      |
|--------------------------------------|------------------------------------------------------------------------------|---------------------------------------------------------------------------------------------------------------------------------------------------------------------------------------|----------------------------------------------------------------------------------------------------------------------------------------------------------------------------------------------------------------------------------------------------------------------------------------------------------------------------------------------------------------------|
| <b>Patient information materials</b> | Perceptions that may impact the management of hip osteoarthritis             | Treatment without surgery is unlikely to lead to recovery                                                                                                                             | Guided and informed content for the written patient materials and this included information on current evidence of treatment effects for surgery and exercise, trial objective and procedures, randomisation process, content of baseline and follow-up sessions, risks and harms, treatment crossover and withdrawal procedures, clinical implications and funding. |
|                                      | Considerations for a trial protocol in the current Danish healthcare context | Clinician authority impacts the management narrative<br><br>The ‘surgery versus exercise’ debate<br><br>Facilitators and barriers for a clinical trial comparing surgery and exercise | Guided development of the neutral narrative used in the written patient materials to facilitate communication of clinical equipoise.                                                                                                                                                                                                                                 |
| <b>Important clinical outcomes</b>   | Perceptions that may impact the management of hip osteoarthritis             | Treatment without surgery is unlikely to lead to recovery                                                                                                                             | Guided selection of hip pain and function as primary outcome.                                                                                                                                                                                                                                                                                                        |
|                                      | Considerations for a trial protocol in the current Danish healthcare context | Most important and meaningful outcomes for patients with hip osteoarthritis                                                                                                           | Guided selection of hip-related quality-of-life and functional performance (i.e. gait function) as key secondary outcomes<br><br>Guided selection of patient acceptable symptom state and muscle strength as exploratory outcomes.                                                                                                                                   |

### *Patient ‘buy in’*

We identified sampling bias as a potential external validity threat in the clinical trial. In response, a parallel observational study was conceptualized to investigate the generalizability of the clinical trial, since many patients probably may decline participation in the trial. Additionally, we addressed facilitators and barriers for surgery and exercise among patients that could systematically affect retention rates and lead to treatment crossover in the clinical trial. Consequently, in an effort to optimize retention and reduce treatment crossovers, we developed a more focused retention procedure (i.e.



1  
2  
3  
4 instructions of study personnel to encourage patient completion) and tailored exercise  
5  
6 protocol with a greater focus on effective supervision during exercise sessions and  
7  
8 implementation of a habitualised exercise protocol. Furthermore, a nuanced statistical  
9  
10 analysis plan was prioritized in regards to handling of missing data, sensitivity and  
11  
12 exploratory analyses, subgroup and causal mediation analysis.  
13  
14  
15  
16  
17

### 18 *Enrolment strategies*

19  
20 We identified preconceived beliefs and perceptions among clinicians as a potential  
21  
22 threat to sampling in the trial. In response, we implemented an instruction and training  
23  
24 strategy for orthopaedic surgeons and project coordinators in standardized verbal  
25  
26 information about the trial to facilitate communication of equipoise during enrolment  
27  
28 procedures. Focus was placed on the creation of a neutral narrative to be used when  
29  
30 verbal information was provided during enrolment. To encourage clinical equipoise, we  
31  
32 provided guidance to clinicians with respect to their roles during the enrolment process  
33  
34 and an independent clinician group was involved to provide detailed verbal information  
35  
36 about the trial.  
37  
38  
39  
40  
41  
42

### 43 *Patient information materials*

44  
45 We identified preconceived beliefs and perceptions among patients that needed to be  
46  
47 addressed in the written patient materials, which covered current evidence of treatment  
48  
49 effects for surgery and exercise, trial objective and procedures, randomization process,  
50  
51 content of baseline and follow-up sessions, risks and harms, treatment crossover and  
52  
53 withdrawal procedures, clinical implications using a balanced a neutral narrative.  
54  
55  
56  
57  
58  
59  
60

### *Important clinical outcomes*

Patient and clinician responses led to three distinct adaptations to the outcomes in the trial protocol. We adopted hip pain and function as primary outcome and implemented hip-related quality-of-life and functional performance (i.e. gait function) as key secondary outcomes. We also included patient acceptable symptom state and muscle strength as exploratory outcomes.

## **DISCUSSION**

### **Main findings**

This novel qualitative PPI study explored patient, clinician, and decision maker perceptions of a clinical trial evaluating the effectiveness of THA compared with exercise to inform protocol development. Our findings showed that patients with severe pain perceived themselves as highly disabled and considered treatment without THA unlikely. Patients expected a fast recovery with complete reduction of hip pain, restored functional performance, and return to activities-of-daily-living after THA, while more uncertainty and scepticism about the effects of exercise was expressed. All key stakeholders, except the physiotherapists, deemed exercise as most appropriate for mild to moderate stages of hip OA or as an adjunct treatment to THA. We found that clinicians tended to use a management narrative suited to their preferred views on diagnostic eligibility, treatment selection, and relative treatment effectiveness. We also identified several facilitators and barriers for surgery and exercise, which mainly included patient age, pain management without analgesics, risk of adverse events, perception of improvement, diagnostic imaging, supervision, and habitualised exercise. Patients and clinicians indicated change in hip pain and hip function as the most

1  
2  
3  
4 important outcomes to evaluate the effectiveness of surgery or exercise. Based on these  
5  
6 findings, we included a parallel observational study investigating the generalizability,  
7  
8 developed an enrolment procedure using generic guidance and balanced narrative  
9  
10 conveyed by an independent clinician to facilitate communication of clinical equipoise,  
11  
12 and adopted change in hip pain and function as the primary outcome in the PROHIP  
13  
14 trial protocol.<sup>28</sup>  
15  
16  
17  
18  
19

### 20 **Comparison with previous studies and interpretation of findings**

21  
22 In line with our findings, a recent qualitative study also found clear and high  
23  
24 expectations for surgery among Swedish patients with knee or hip OA.<sup>37</sup> However,  
25  
26 several patients reconsidered their treatment options and changed attitudes towards  
27  
28 either accepting or declining surgery after participation in a digital non-surgical  
29  
30 program, emphasizing the importance of providing sufficient information about  
31  
32 management options to facilitate shared-decision making.<sup>37</sup> Our findings also indicated  
33  
34 that patients displayed uncertainties about the potential benefits of exercise. This could  
35  
36 be driven by uncertainties and lack of knowledge about the effectiveness of exercise  
37  
38 amongst clinicians,<sup>38</sup> and due to less than 40% of the patients are recommended or  
39  
40 referred to first-line management.<sup>13</sup> Based on previous qualitative studies,<sup>39 40</sup> recovery  
41  
42 expectations among patients in this study were related to the criterion of resolution for  
43  
44 surgery and redefinition for exercise, which could indicate that patients accepting  
45  
46 participation may differ from those declining participation in our clinical trial in terms  
47  
48 of recovery expectations, hip pain, and functional status potentially reducing the  
49  
50 generalizability of the PROHIP trial.  
51  
52  
53  
54  
55  
56  
57  
58  
59  
60

1  
2  
3  
4 Our findings showed that clinicians tended to use a management narrative  
5 suited to their preferred treatment. This strategy is in contrast to the information needs  
6 desired by patients with hip OA during clinical encounters,<sup>41</sup> and since clinicians have a  
7 considerable influence on the attitudes and beliefs of patients this may result in  
8 misconceptions and uninformed decisions.<sup>41 42</sup> This suggests that both orthopaedic  
9 surgeons and physiotherapists could sway patient opinions about THA surgery and  
10 exercise in either direction during enrolment procedures in the PROHIP trial by  
11 highlighting the benefits of their preferred treatment option, whilst simultaneously  
12 accentuating the limitations of the other treatment possibly leading to sampling bias.  
13  
14  
15  
16  
17  
18  
19  
20  
21  
22  
23  
24

25 In consistency with previous studies,<sup>43-45</sup> clinicians in this study displayed  
26 conflicting views on the indication criteria for THA. More interestingly, patients in this  
27 study perceived findings or progression of hip OA on radiographic imaging to be the  
28 primary determinant for THA, although there is low agreement between hip pain and  
29 radiographic hip OA.<sup>46</sup> This may suggest that the patients still have an outdated ‘wear-  
30 and-tear’ conception of hip OA that contradicts up-to-date insights on pathogenesis,  
31 considering OA as a whole-joint disease.<sup>47</sup> This misconception of OA has previously  
32 been shown to be facilitated by clinicians’ language and explanations,<sup>48</sup> which  
33 emphasize the need of neutral and evidence based information during enrolment in the  
34 PROHIP trial.  
35  
36  
37  
38  
39  
40  
41  
42  
43  
44  
45  
46  
47

48 In line with the Osteoarthritis Research Society International  
49 recommendations,<sup>49</sup> our findings highlighted change in hip pain and function as the  
50 most important outcome. Several patient-reported outcome measures are available to  
51 evaluate pain and functional status in patients with hip OA.<sup>49 50</sup> However, the OHS  
52  
53  
54  
55  
56  
57  
58  
59  
60

1  
2  
3  
4 appears to have the best validated clinometric properties,<sup>50</sup> indicating this as an  
5  
6 appropriate primary outcome measure.  
7  
8  
9

### 10 11 **Limitations and strengths** 12

13 Our study has limitations and strengths. A major limitation is that we conducted only  
14 one focus group interview for both the clinicians and decision makers reducing the  
15 likelihood of data saturation. Thus, we may have missed important perspectives in these  
16 key stakeholder groups. However, we considered the patients perceptions as the most  
17 important for our clinical trial. Another limitation is that 3 out of 14 patients had  
18 previously undergone THA surgery, which may have influenced their perceptions, as  
19 previous surgery has been suggested to affect patient expectations.<sup>37</sup> Furthermore, all  
20 patients were scheduled for THA surgery prior to their participation in this study, which  
21 further could have primed them to be in favour of surgery. In contrary, this may  
22 increase generalizability of our findings as previous THA is not used as an exclusion  
23 criterion in the PROHIP trial,<sup>28</sup> and all patients will be informed that they are  
24 considered eligible for a THA prior to accepting participation. Strengths of our study  
25 comprise the variety in the sample of patients interviewed, including females and males  
26 of varying ages and different levels of hip pain and disability recruited from both a  
27 regional hospital and a university hospital, thereby increasing the generalizability of our  
28 findings for this group. Additionally, we interviewed three key stakeholder groups  
29 involved in receiving and delivering treatment and making decisions about the  
30 management of hip OA to provide multiple perspectives and extend the scope of the  
31 findings. Lastly, an independent researcher conducted the data analysis from reading  
32 and coding of the transcripts to development of themes before presenting the findings to  
33  
34  
35  
36  
37  
38  
39  
40  
41  
42  
43  
44  
45  
46  
47  
48  
49  
50  
51  
52  
53  
54  
55  
56  
57  
58  
59  
60

1  
2  
3  
4 the other authors, thus decreasing the possibility of interpretation bias due to clinical  
5  
6 interest of conflict.  
7  
8  
9

## 10 11 **CONCLUSION**

12  
13  
14 Patients and clinicians had beliefs and perceptions on the management of hip  
15  
16 osteoarthritis that could possibly affect enrolment procedures resulting in sampling bias  
17  
18 and reduced generalizability of our clinical trial. Moreover, facilitators and barriers for  
19  
20 surgery and exercise could influence retention rates and treatment crossovers in the trial.  
21  
22 Therefore, we implemented three main strategies to improve methodological  
23  
24 rigorousness of our trial protocol. Firstly, we added an observational study investigating  
25  
26 the generalizability to address a potential low enrolment rate. Secondly, we developed  
27  
28 an enrolment procedure using generic guidance and balanced narrative conveyed by an  
29  
30 independent clinician to facilitate communication of clinical equipoise. Thirdly, we  
31  
32 adopted change in hip pain and function as the primary outcome. Our findings suggest  
33  
34 that future comparative clinical trials evaluating surgical and non-surgical management  
35  
36 should explore key stakeholder perceptions of the treatments of interest prior to  
37  
38 designing the trial protocol to reduce bias in the studies.  
39  
40  
41  
42  
43  
44  
45  
46

## 47 **Acknowledgments**

48  
49 We would like to thank all of the participating patients, orthopaedic surgeons,  
50  
51 physiotherapists, and decisions makers. Furthermore, we would like to acknowledge the  
52  
53 orthopaedic surgeons from the Department of Orthopaedic Surgery, University Hospital  
54  
55 of Southern Denmark, Vejle Hospital and Department of Orthopaedic Surgery and  
56  
57  
58  
59  
60

1  
2  
3  
4 Traumatology, Odense University Hospital for their involvement in the recruitment of  
5  
6 patients.  
7  
8  
9

### 10 11 **Authors' contributions**

12  
13  
14 Conception and design: TF, IM, LRM, SO, KGI, and CM designed the study. Analysis  
15 and interpretation of the data: TF, KST, and CM. Drafting of the article: TF, KGI and  
16  
17 CM. Critical revision of the article for important intellectual content: TF, KST, SO, IM,  
18  
19 LRM, KGI, and CM. Final approval of the article: TF, KST, SO, IM, LRM, KGI, and  
20  
21 CM. Obtaining of funding: TF and KGI. Collection and assembly of data: TF and KST.  
22  
23  
24  
25 Development of interview guides: TF.  
26  
27  
28  
29

### 30 31 **Funding statement**

32  
33 This work was supported by The Danish Rheumatism Association (R166-5553). The  
34  
35 funders were not involved in designing the study, data collection, data management,  
36  
37 data analysis, interpretation of the results, writing the article, or in the decision to  
38  
39 submit the article for publication.  
40  
41  
42  
43  
44

### 45 46 **Competing interest**

47  
48 All authors have completed the ICMJE disclosure form available at  
49  
50 [www.icmje.org/disclosure-of-interest/](http://www.icmje.org/disclosure-of-interest/) and declare that we have no competing interest  
51  
52 for the submitted work.  
53  
54  
55

### 56 57 **Ethics approval**

58  
59 This study was approved by The Danish Data Protection Agency (Journal No  
60

1  
2  
3  
4 18/23994), while no ethical approval was required according to the Danish Act on  
5  
6 Research Ethics.  
7  
8  
9

## 10 **Data availability statement**

11  
12  
13  
14 Data are available upon reasonable request. Data comprise digital voice recordings of  
15  
16 each focus group interview, verbatim transcriptions in Word files, and participant-  
17  
18 reported questionnaire responses in PDF files. These data are stored in a password-  
19  
20 protected hospital server only accessible to the researchers. Digital audio recordings and  
21  
22 individual participant-reported questionnaire responses contain identifiable data and  
23  
24 will not be made available on request to maintain participant anonymity. Transcriptions  
25  
26 of each focus group interview and the participant characteristics data-set with de-  
27  
28 identified participant data may be made available upon reasonable request.  
29  
30  
31  
32  
33  
34  
35  
36  
37  
38  
39  
40  
41  
42  
43  
44  
45  
46  
47  
48  
49  
50  
51  
52  
53  
54  
55  
56  
57  
58  
59  
60



## REFERENCES

1. Cross M, Smith E, Hoy D, et al. The global burden of hip and knee osteoarthritis: estimates from the global burden of disease 2010 study. *Ann Rheum Dis* 2014;73(7):1323-30. doi: 10.1136/annrheumdis-2013-204763 [published Online First: 2014/02/21]
2. Pereira D, Peleteiro B, Araujo J, et al. The effect of osteoarthritis definition on prevalence and incidence estimates: a systematic review. *Osteoarthritis Cartilage* 2011;19(11):1270-85. doi: 10.1016/j.joca.2011.08.009 [published Online First: 2011/09/13]
3. Ferguson RJ, Palmer AJ, Taylor A, et al. Hip replacement. *Lancet* 2018;392(10158):1662-71. doi: 10.1016/s0140-6736(18)31777-x [published Online First: 2018/11/30]
4. Rosenlund S, Broeng L, Holsgaard-Larsen A, et al. Patient-reported outcome after total hip arthroplasty: comparison between lateral and posterior approach. *Acta Orthop* 2017;88(3):239-47. doi: 10.1080/17453674.2017.1291100 [published Online First: 2017/05/04]
5. Shan L, Shan B, Graham D, et al. Total hip replacement: a systematic review and meta-analysis on mid-term quality of life. *Osteoarthritis Cartilage* 2014;22(3):389-406. doi: 10.1016/j.joca.2013.12.006 [published Online First: 2014/01/07]
6. Beswick AD, Wylde V, Gooberman-Hill R, et al. What proportion of patients report long-term pain after total hip or knee replacement for osteoarthritis? A systematic review of prospective studies in unselected patients. *BMJ Open*

- 2012;2(1):e000435. doi: 10.1136/bmjopen-2011-000435 [published Online First: 2012/02/24]
7. Bannuru RR, Osani MC, Vaysbrot EE, et al. OARSI guidelines for the non-surgical management of knee, hip, and polyarticular osteoarthritis. *Osteoarthritis Cartilage* 2019;27(11):1578-89. doi: 10.1016/j.joca.2019.06.011 [published Online First: 2019/07/07]
8. van Doormaal MCM, Meerhoff GA, Vliet Vlieland TPM, et al. A clinical practice guideline for physical therapy in patients with hip or knee osteoarthritis. *Musculoskeletal Care* 2020 doi: 10.1002/msc.1492 [published Online First: 2020/07/10]
9. Goh SL, Persson MSM, Stocks J, et al. Relative Efficacy of Different Exercises for Pain, Function, Performance and Quality of Life in Knee and Hip Osteoarthritis: Systematic Review and Network Meta-Analysis. *Sports Med* 2019;49(5):743-61. doi: 10.1007/s40279-019-01082-0 [published Online First: 2019/03/05]
10. Hansen S, Mikkelsen LR, Overgaard S, et al. Effectiveness of supervised resistance training for patients with hip osteoarthritis - a systematic review. *Dan Med J* 2020;67(6) [published Online First: 2020/08/04]
11. Dell'Isola A, Jönsson T, Rolfson O, et al. Willingness to Undergo Joint Surgery Following a First-Line Intervention for Osteoarthritis: Data From the Better Management of People With Osteoarthritis Register. *Arthritis Care Res (Hoboken)* 2021;73(6):818-27. doi: 10.1002/acr.24486 [published Online First: 2020/10/15]
12. Svege I, Nordsletten L, Fernandes L, et al. Exercise therapy may postpone total hip replacement surgery in patients with hip osteoarthritis: a long-term follow-up of

- 1  
2  
3  
4 a randomised trial. *Ann Rheum Dis* 2015;74(1):164-9. doi:  
5  
6 10.1136/annrheumdis-2013-203628 [published Online First: 2013/11/21]  
7  
8  
9 13. Hagen KB, Smedslund G, Østerås N, et al. Quality of Community-Based  
10  
11 Osteoarthritis Care: A Systematic Review and Meta-Analysis. *Arthritis Care*  
12  
13 *Res (Hoboken)* 2016;68(10):1443-52. doi: 10.1002/acr.22891 [published Online  
14  
15 First: 2016/03/19]  
16  
17  
18 14. Zhang W, Moskowitz RW, Nuki G, et al. OARSI recommendations for the  
19  
20 management of hip and knee osteoarthritis, Part II: OARSI evidence-based,  
21  
22 expert consensus guidelines. *Osteoarthritis Cartilage* 2008;16(2):137-62. doi:  
23  
24 10.1016/j.joca.2007.12.013 [published Online First: 2008/02/19]  
25  
26  
27 15. Skou ST, Poulsen E, Bricca A, et al. Benefits and Harms of Interventions With  
28  
29 Surgery Compared to Interventions Without Surgery for Musculoskeletal  
30  
31 Conditions: A Systematic Review With Meta-analysis. *J Orthop Sports Phys*  
32  
33 *Ther* 2022;52(6):312-44. doi: 10.2519/jospt.2022.11075 [published Online First:  
34  
35 2022/06/02]  
36  
37  
38 16. Ross S, Grant A, Counsell C, et al. Barriers to participation in randomised  
39  
40 controlled trials: a systematic review. *J Clin Epidemiol* 1999;52(12):1143-56.  
41  
42 doi: 10.1016/s0895-4356(99)00141-9 [published Online First: 1999/12/02]  
43  
44  
45 17. Frobell RB, Roos EM, Roos HP, et al. A randomized trial of treatment for acute  
46  
47 anterior cruciate ligament tears. *N Engl J Med* 2010;363(4):331-42. doi:  
48  
49 10.1056/NEJMoa0907797 [published Online First: 2010/07/28]  
50  
51  
52 18. Skou ST, Roos EM, Laursen MB, et al. A Randomized, Controlled Trial of Total  
53  
54 Knee Replacement. *N Engl J Med* 2015;373(17):1597-606. doi:  
55  
56 10.1056/NEJMoa1505467  
57  
58  
59  
60

- 1  
2  
3  
4 19. van de Graaf VA, Noorduyn JCA, Willigenburg NW, et al. Effect of Early Surgery  
5 vs Physical Therapy on Knee Function Among Patients With Nonobstructive  
6  
7 Meniscal Tears: The ESCAPE Randomized Clinical Trial. *Jama*  
8  
9 2018;320(13):1328-37. doi: 10.1001/jama.2018.13308 [published Online First:  
10  
11 2018/10/05]  
12  
13  
14  
15  
16 20. Weinstein JN, Tosteson TD, Lurie JD, et al. Surgical vs nonoperative treatment for  
17  
18 lumbar disk herniation: the Spine Patient Outcomes Research Trial (SPORT): a  
19  
20 randomized trial. *Jama* 2006;296(20):2441-50. doi: 10.1001/jama.296.20.2441  
21  
22 [published Online First: 2006/11/23]  
23  
24  
25 21. Skou ST, Hölmich P, Lind M, et al. Early Surgery or Exercise and Education for  
26  
27 Meniscal Tears in Young Adults. *NEJM Evidence* 2022;1(2) doi:  
28  
29 10.1056/EVIDoa2100038  
30  
31  
32 22. Al-Shahi Salman R, Beller E, Kagan J, et al. Increasing value and reducing waste in  
33  
34 biomedical research regulation and management. *Lancet* 2014;383(9912):176-  
35  
36 85. doi: 10.1016/s0140-6736(13)62297-7 [published Online First: 2014/01/15]  
37  
38  
39 23. Crocker JC, Pratt-Boyden K, Hislop J, et al. Patient and public involvement (PPI) in  
40  
41 UK surgical trials: a survey and focus groups with stakeholders to identify  
42  
43 practices, views, and experiences. *Trials* 2019;20(1):119. doi: 10.1186/s13063-  
44  
45 019-3183-0 [published Online First: 2019/02/13]  
46  
47  
48 24. Crocker JC, Ricci-Cabello I, Parker A, et al. Impact of patient and public  
49  
50 involvement on enrolment and retention in clinical trials: systematic review and  
51  
52 meta-analysis. *Bmj* 2018;363:k4738. doi: 10.1136/bmj.k4738 [published Online  
53  
54 First: 2018/11/30]  
55  
56  
57  
58  
59  
60

- 1  
2  
3  
4 25. Owyang D, Bakhsh A, Brewer D, et al. Patient and Public Involvement Within  
5  
6 Orthopaedic Research: A Systematic Review. *J Bone Joint Surg Am*  
7  
8 2021;103(13):e51. doi: 10.2106/jbjs.20.01573 [published Online First:  
9  
10 2021/07/07]  
11  
12
- 13 26. Adom D, Yeboah A, Ankrah A. Constructivism philosophical paradigm: implication  
14  
15 for research, teaching and learning. *GJAHSS* 2016;4:1-9.  
16  
17
- 18 27. Tong A, Sainsbury P, Craig J. Consolidated criteria for reporting qualitative  
19  
20 research (COREQ): a 32-item checklist for interviews and focus groups. *Int J*  
21  
22 *Qual Health Care* 2007;19(6):349-57. doi: 10.1093/intqhc/mzm042 [published  
23  
24 Online First: 2007/09/18]  
25  
26
- 27 28. Frydendal T, Christensen R, Mechlenburg I, et al. Total hip arthroplasty versus  
28  
29 progressive resistance training in patients with severe hip osteoarthritis: protocol  
30  
31 for a multicentre, parallel-group, randomised controlled superiority trial. *BMJ*  
32  
33 *Open* 2021;11(10):e051392. doi: 10.1136/bmjopen-2021-051392 [published  
34  
35 Online First: 2021/10/24]  
36  
37
- 38 29. Shimmin C. Methods of patient and public engagement: A guide: George and Faye  
39  
40 Yee- Center of Healthcare Innovation; 2020 [Available from:  
41  
42 [https://static1.squarespace.com/static/5e57d5337fe0d104c77cca10/t/5ed808e613](https://static1.squarespace.com/static/5e57d5337fe0d104c77cca10/t/5ed808e613338b69dcb8f6df/1591216360358/20.05.20+PE+methods+of+Engagement+web.pdf)  
43  
44 [338b69dcb8f6df/1591216360358/20.05.20+PE+methods+of+Engagement+web.](https://static1.squarespace.com/static/5e57d5337fe0d104c77cca10/t/5ed808e613338b69dcb8f6df/1591216360358/20.05.20+PE+methods+of+Engagement+web.pdf)  
45  
46 [pdf](https://static1.squarespace.com/static/5e57d5337fe0d104c77cca10/t/5ed808e613338b69dcb8f6df/1591216360358/20.05.20+PE+methods+of+Engagement+web.pdf) accessed 24 July 2020.  
47  
48  
49
- 50 30. Lambert SD, Loiselle CG. Combining individual interviews and focus groups to  
51  
52 enhance data richness. *Journal of Advanced Nursing* 2008;62(2):228-37. doi:  
53  
54 10.1111/j.1365-2648.2007.04559.x  
55  
56  
57  
58  
59  
60

- 1  
2  
3  
4 31. Krueger RA, Casey MA. Designing and conducting focus group interviews: St Paul,  
5  
6 Minnesota, USA, 2002.  
7  
8  
9 32. Paulsen A, Odgaard A, Overgaard S. Translation, cross-cultural adaptation and  
10  
11 validation of the Danish version of the Oxford hip score: Assessed against  
12  
13 generic and disease-specific questionnaires. *Bone Joint Res* 2012;1(9):225-33.  
14  
15 doi: 10.1302/2046-3758.19.2000076 [published Online First: 2013/04/24]  
16  
17  
18 33. Nilsson AK, Lohmander LS, Klassbo M, et al. Hip disability and osteoarthritis  
19  
20 outcome score (HOOS)--validity and responsiveness in total hip replacement.  
21  
22 *BMC Musculoskelet Disord* 2003;4:10. doi: 10.1186/1471-2474-4-10 [published  
23  
24 Online First: 2003/06/05]  
25  
26  
27 34. Mouton J. Understanding Social Research: JL. van Schaik 1998.  
28  
29  
30 35. Polit DFTB, C. Nursing Research: Principles and Methods 2004.  
31  
32  
33 36. Attride-Stirling J. Thematic networks: an analytic tool for qualitative research.  
34  
35 *Qualitative Research* 2001;1(3):385-405. doi: 10.1177/146879410100100307  
36  
37  
38 37. Cronström A, Dahlberg LE, Nero H, et al. "I was considering surgery because I  
39  
40 believed that was how it was treated": a qualitative study on willingness for joint  
41  
42 surgery after completion of a digital management program for osteoarthritis.  
43  
44 *Osteoarthritis Cartilage* 2019;27(7):1026-32. doi: 10.1016/j.joca.2019.04.004  
45  
46 [published Online First: 2019/04/20]  
47  
48  
49 38. Nissen N, Holm PM, Bricca A, et al. Clinicians' beliefs and attitudes to physical  
50  
51 activity and exercise therapy as treatment for knee and/or hip osteoarthritis: a  
52  
53 scoping review. *Osteoarthritis Cartilage* 2022;30(2):260-69. doi:  
54  
55 10.1016/j.joca.2021.11.008 [published Online First: 2021/11/21]  
56  
57  
58  
59  
60

- 1  
2  
3  
4 39. Beaton DE, Tarasuk V, Katz JN, et al. "Are you better?" A qualitative study of the  
5  
6 meaning of recovery. *Arthritis Rheum* 2001;45(3):270-9. doi: 10.1002/1529-  
7  
8 0131(200106)45:3<270::Aid-art260>3.0.Co;2-t [published Online First:  
9  
10 2001/06/21]  
11  
12  
13 40. Myburgh C, Boyle E, Lauridsen HH, et al. What influences retrospective self-  
14  
15 appraised recovery status among Danes with low-back problems? A comparative  
16  
17 qualitative investigation. *J Rehabil Med* 2015;47(8):741-7. doi:  
18  
19 10.2340/16501977-1987 [published Online First: 2015/07/02]  
20  
21  
22 41. Brembo EA, Kapstad H, Eide T, et al. Patient information and emotional needs  
23  
24 across the hip osteoarthritis continuum: a qualitative study. *BMC Health Serv*  
25  
26 *Res* 2016;16:88. doi: 10.1186/s12913-016-1342-5 [published Online First:  
27  
28 2016/03/13]  
29  
30  
31 42. Darlow B, Dowell A, Baxter GD, et al. The enduring impact of what clinicians say  
32  
33 to people with low back pain. *Ann Fam Med* 2013;11(6):527-34. doi:  
34  
35 10.1370/afm.1518 [published Online First: 2013/11/13]  
36  
37  
38 43. Ackerman IN, Dieppe PA, March LM, et al. Variation in age and physical status  
39  
40 prior to total knee and hip replacement surgery: a comparison of centers in  
41  
42 Australia and Europe. *Arthritis Rheum* 2009;61(2):166-73. doi:  
43  
44 10.1002/art.24215 [published Online First: 2009/01/30]  
45  
46  
47 44. Cobos R, Latorre A, Aizpuru F, et al. Variability of indication criteria in knee and  
48  
49 hip replacement: an observational study. *BMC Musculoskelet Disord*  
50  
51 2010;11:249. doi: 10.1186/1471-2474-11-249 [published Online First:  
52  
53 2010/10/28]  
54  
55  
56  
57  
58  
59  
60

- 1  
2  
3  
4 45. Dreinhöfer KE, Dieppe P, Stürmer T, et al. Indications for total hip replacement:  
5  
6 comparison of assessments of orthopaedic surgeons and referring physicians.  
7  
8 *Ann Rheum Dis* 2006;65(10):1346-50. doi: 10.1136/ard.2005.047811 [published  
9  
10 Online First: 2006/01/28]  
11  
12
- 13 46. Kim C, Nevitt MC, Niu J, et al. Association of hip pain with radiographic evidence  
14  
15 of hip osteoarthritis: diagnostic test study. *BMJ* 2015;351:h5983. doi:  
16  
17 10.1136/bmj.h5983 [published Online First: 2015/12/04]  
18  
19
- 20 47. Hunter DJ, Bierma-Zeinstra S. Osteoarthritis. *The Lancet* 2019;393(10182):1745-  
21  
22 59. doi: 10.1016/s0140-6736(19)30417-9  
23  
24
- 25 48. Darlow B, Brown M, Thompson B, et al. Living with osteoarthritis is a balancing  
26  
27 act: an exploration of patients' beliefs about knee pain. *BMC Rheumatol*  
28  
29 2018;2:15. doi: 10.1186/s41927-018-0023-x [published Online First:  
30  
31 2019/03/20]  
32  
33
- 34 49. Lane NE, Hochberg MC, Nevitt MC, et al. OARSI Clinical Trials  
35  
36 Recommendations: Design and conduct of clinical trials for hip osteoarthritis.  
37  
38 *Osteoarthritis Cartilage* 2015;23(5):761-71. doi: 10.1016/j.joca.2015.03.006  
39  
40 [published Online First: 2015/05/09]  
41  
42
- 43 50. Harris K, Dawson J, Gibbons E, et al. Systematic review of measurement properties  
44  
45 of patient-reported outcome measures used in patients undergoing hip and knee  
46  
47 arthroplasty. *Patient Relat Outcome Meas* 2016;7:101-8. doi:  
48  
49 10.2147/prom.S97774 [published Online First: 2016/08/16]  
50  
51  
52  
53  
54  
55  
56  
57  
58  
59  
60



## FIGURE LEGENDS

**Figure 1.** Eligibility criteria for each key stakeholder group: Patients, Clinicians and Decision makers.

**Figure 2.** Main themes and supporting codes identified in focus groups with patients with hip osteoarthritis considered eligible for total hip arthroplasty, clinicians (orthopaedic surgeons and physiotherapists) from orthopaedic and physiotherapy departments, and decision makers from a political party or non-governmental organisation.

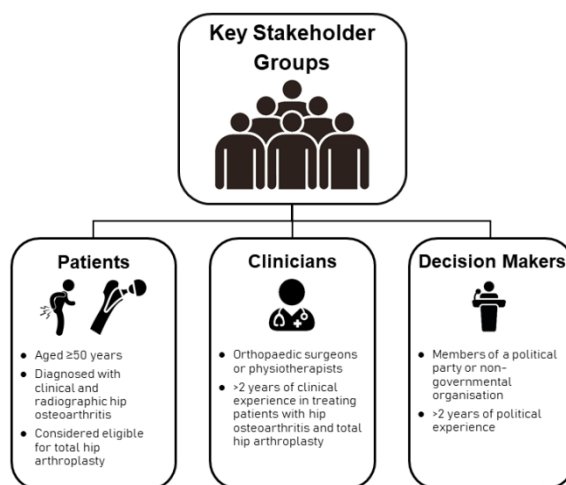

Figure 1. Eligibility criteria for each key stakeholder group: Patients, Clinicians and Decision makers.

338x190mm (96 x 96 DPI)

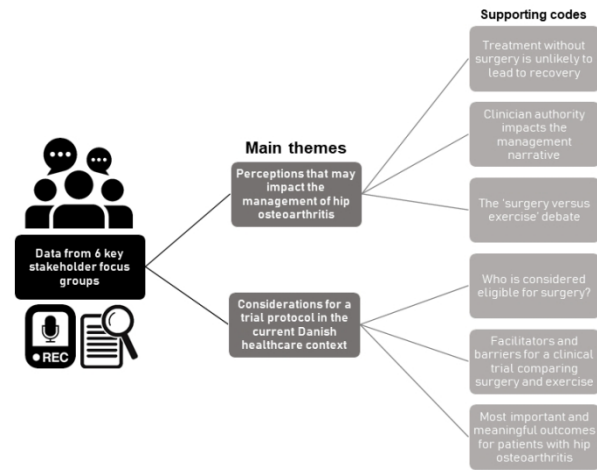

Figure 2. Main themes and supporting codes identified in focus groups with patients with hip osteoarthritis considered eligible for total hip arthroplasty, clinicians (orthopaedic surgeons and physiotherapists) from orthopaedic and physiotherapy departments, and decision makers from a political party or non-governmental organisation.

338x190mm (96 x 96 DPI)

1  
2  
3  
4  
5  
6  
7  
8  
9  
10  
11  
12  
13  
14  
15  
16  
17  
18  
19  
20  
21  
22  
23  
24  
25  
26  
27  
28  
29  
30  
31  
32  
33  
34  
35  
36  
37  
38  
39  
40  
41  
42  
43  
44  
45  
46  
47  
48  
49  
50  
51  
52  
53  
54  
55  
56  
57  
58  
59  
60

## Online Supplementary File 1A. Interview guide for the patient group

| Topic                                          | Main question                                                                    | Supplementary probing questions                                                                                                                                                                                                                                                                                                                                                                                                                                                                                                                                                                                                                      |
|------------------------------------------------|----------------------------------------------------------------------------------|------------------------------------------------------------------------------------------------------------------------------------------------------------------------------------------------------------------------------------------------------------------------------------------------------------------------------------------------------------------------------------------------------------------------------------------------------------------------------------------------------------------------------------------------------------------------------------------------------------------------------------------------------|
| Treatment for hip osteoarthritis (THA surgery) | What do you think about surgery as treatment for hip osteoarthritis?             | 1. When and why did you start considering surgery as a treatment option?<br>2. How was the decision of surgery taken?<br>3. When do you know when you are ready for surgery? (physically and mentally)<br>4. How do you think the information was about the surgery, including risks and other treatments?<br>5. What expectations do you have for the surgery?<br>6. What do you consider to be the advantages of surgery?<br>7. What do you consider to be the disadvantages of surgery?<br>8. What is the main reason/motivation to undergo surgery? (or declining surgery)                                                                       |
| Treatment for hip osteoarthritis (exercise)    | What do you think about exercise as treatment for hip osteoarthritis?            | 9. What treatments have you otherwise tried before surgery? (type, systematics and durations)<br>10. How have your experiences been with exercise? (type, systematic, duration and effect)<br>11. How have your experiences been with other treatments? (effect)<br>12. What do you consider to be the advantages of exercise?<br>13. What do you consider to be the disadvantages of exercise?                                                                                                                                                                                                                                                      |
| Participation in a clinical trial              | <b>CASE DESCRIPTION</b><br><br>(Detailed information about the PROHIP trial)     | 14. What do you think about participating in a trial where you are randomly being assigned to surgery (total hip arthroplasty) or exercise (with the option of later surgery if needed)?<br>15. What do you consider to be of importance to whether you would participate in the trial?<br>16. What would affect your considerations about participating in the trial?                                                                                                                                                                                                                                                                               |
| Patient material and information               | How would you prefer to receive information about this trial?                    | 17. When do you think, it is best to present the information about the trial for potential participants?<br>18. What do you think the patient information should contain?                                                                                                                                                                                                                                                                                                                                                                                                                                                                            |
| Exercise protocol                              | If you were to participate in 12-weeks of exercise, how do think this should be? | 19. What do you think about resistance training in machines?<br>20. What significance do the physical frames have for you? (location, duration, and environment) <ul style="list-style-type: none"> <li>• How many times a week is it possible for you to exercise?</li> <li>• How long would you spend on one training session?</li> </ul> 21. What significance does it have for you, if you have to drive for the training sessions?<br>22. What significance does it have for you whether a physiotherapist supervises the training sessions?<br>23. How do you think you can continue to exercise on your own after a 12-week training program? |

1  
2  
3  
4  
5  
6  
7  
8  
9  
10  
11  
12  
13  
14  
15  
16  
17  
18  
19  
20  
21  
22  
23  
24  
25  
26  
27  
28  
29  
30  
31  
32  
33  
34  
35  
36  
37  
38  
39  
40  
41  
42  
43  
44  
45  
46  
47  
48  
49  
50  
51  
52  
53  
54  
55  
56  
57  
58  
59  
60

---

|          |                                                                                                                                       |                                                                                                                                                                                                                                                                                                                                                                                           |
|----------|---------------------------------------------------------------------------------------------------------------------------------------|-------------------------------------------------------------------------------------------------------------------------------------------------------------------------------------------------------------------------------------------------------------------------------------------------------------------------------------------------------------------------------------------|
| Outcomes | If we were to measure the effect of your surgery/exercise program – What do you consider is the most important thing to measure upon? | 24. What else do you think is important to measure upon?<br>25. What is your main problem right now (due to hip osteoarthritis)?<br>26. How would you describe whether a surgery has been successful?<br>27. How would you describe whether an exercise program has been successful?<br>28. What do you think about the questionnaires you filled out? (Relevance, number of items, etc.) |
|----------|---------------------------------------------------------------------------------------------------------------------------------------|-------------------------------------------------------------------------------------------------------------------------------------------------------------------------------------------------------------------------------------------------------------------------------------------------------------------------------------------------------------------------------------------|

---

For peer review only

1  
2  
3  
4 **Online Supplementary File 1B. Interview guide for the clinician group**

| Topic                                       | Main question                                                                                                | Supplementary probing questions                                                                                                                                                                                                                                                                                                                                                                                                                                                                                                                                                                                                                                                                                                                                                                                                                                                                                           |
|---------------------------------------------|--------------------------------------------------------------------------------------------------------------|---------------------------------------------------------------------------------------------------------------------------------------------------------------------------------------------------------------------------------------------------------------------------------------------------------------------------------------------------------------------------------------------------------------------------------------------------------------------------------------------------------------------------------------------------------------------------------------------------------------------------------------------------------------------------------------------------------------------------------------------------------------------------------------------------------------------------------------------------------------------------------------------------------------------------|
| Treatment for hip osteoarthritis (surgery)  | What do you think about surgery as treatment for hip osteoarthritis?                                         | <p>1. How do you experience the patients' perception of surgery (THA) as treatment for hip osteoarthritis?</p> <p>2. What do you experience patients with hip osteoarthritis indicate as main reason/motivation to undergo surgery?</p> <p>3. What do you consider to be the advantages of surgery?</p> <p>4. What do you consider to be the disadvantages of surgery?</p> <p>5. When do you think a patient with hip osteoarthritis is eligible for a THA?</p>                                                                                                                                                                                                                                                                                                                                                                                                                                                           |
| Treatment for hip osteoarthritis (exercise) | What do you think about exercise as treatment for hip osteoarthritis?                                        | <p>6. How do you experience the patients' perception of exercise as treatment for hip osteoarthritis?</p> <p>7. What do you experience patients with hip osteoarthritis indicate as main reason/motivation in choosing exercise rather than surgery?</p> <p>8. What do you consider to be the advantages of exercise?</p> <p>9. What do you consider to be the disadvantages of exercise?</p> <p>10. When do you think a patient with hip osteoarthritis should try exercise instead of getting a THA?</p> <p>11. How do you interpret the results of this trial?<sup>20</sup></p> <p>12. How have you experienced the debate on surgery (total knee arthroplasty) and exercise?</p> <p>11. How do you think this debate affects the patients?</p> <p>12. What do you consider to be the advantages of this debate?</p> <p>13. What do you consider to be disadvantages of this debate?</p>                               |
| Participation in a clinical trial           | <p>CASE DESCRIPTION</p> <p>(Detailed information about the PROHIP trial)</p>                                 | <p>14. What is your perception of a trial, in which patients are randomly assigned to surgery (THA) or exercise (with the option of later surgery if needed)?</p> <p>15. What challenges do you consider there are in recruiting for a trial, in which patients are randomized to THA or resistance training?</p> <p>16. How do you think it is ensured that clinician (e.g. orthopedic surgeons, physiotherapists, and nurses) do not color the patients' decision to participate?</p> <p>17. How are orthopedic surgeons and physiotherapists motivated to participate in the trial?</p> <p>18. How is collaboration between surgeons and physiotherapists in relation to the project created?</p> <p>19. How would you conduct the screening and recruitment procedure in this trial?</p> <p>20. What do you consider as of importance for whether patients with hip osteoarthritis will participate in the study?</p> |
| Patient material and information            | How do you think the patient information regarding the trial should be presented for potential participants? | 21. When do you think, it is best to present the information about the trial for potential participants?                                                                                                                                                                                                                                                                                                                                                                                                                                                                                                                                                                                                                                                                                                                                                                                                                  |

|    |                   |                                                                                                                                                                  |
|----|-------------------|------------------------------------------------------------------------------------------------------------------------------------------------------------------|
| 1  |                   |                                                                                                                                                                  |
| 2  | Exercise protocol | How do you think the exercise intervention should be conducted in the trial?                                                                                     |
| 3  |                   | 22. What exercises do you think are relevant to include in the exercise program?                                                                                 |
| 4  |                   | 23. How long do you think one training session should last?                                                                                                      |
| 5  |                   | 24. How do you think we will get the patients to continue to exercise after the 12-week intervention period?                                                     |
| 6  |                   |                                                                                                                                                                  |
| 7  |                   |                                                                                                                                                                  |
| 8  | Outcomes          | Which outcome do you consider to be the primary to measure in patients with hip osteoarthritis?                                                                  |
| 9  |                   | 25. Which secondary outcomes do you consider to be important to measure in patients with hip osteoarthritis?                                                     |
| 10 |                   | 26. What do you experience patients with hip osteoarthritis indicate as being the primary problem (symptoms/limitations) that is of importance to the treatment? |
| 11 |                   | 27. How would you describe whether surgery (THA) has been successful?                                                                                            |
| 12 |                   | 28. How would you describe whether exercise has been successful?                                                                                                 |
| 13 |                   |                                                                                                                                                                  |
| 14 |                   |                                                                                                                                                                  |
| 15 |                   |                                                                                                                                                                  |
| 16 |                   |                                                                                                                                                                  |
| 17 |                   |                                                                                                                                                                  |
| 18 |                   |                                                                                                                                                                  |
| 19 |                   |                                                                                                                                                                  |
| 20 |                   |                                                                                                                                                                  |
| 21 |                   |                                                                                                                                                                  |
| 22 |                   |                                                                                                                                                                  |
| 23 |                   |                                                                                                                                                                  |
| 24 |                   |                                                                                                                                                                  |
| 25 |                   |                                                                                                                                                                  |
| 26 |                   |                                                                                                                                                                  |
| 27 |                   |                                                                                                                                                                  |
| 28 |                   |                                                                                                                                                                  |
| 29 |                   |                                                                                                                                                                  |
| 30 |                   |                                                                                                                                                                  |
| 31 |                   |                                                                                                                                                                  |
| 32 |                   |                                                                                                                                                                  |
| 33 |                   |                                                                                                                                                                  |
| 34 |                   |                                                                                                                                                                  |
| 35 |                   |                                                                                                                                                                  |
| 36 |                   |                                                                                                                                                                  |
| 37 |                   |                                                                                                                                                                  |
| 38 |                   |                                                                                                                                                                  |
| 39 |                   |                                                                                                                                                                  |
| 40 |                   |                                                                                                                                                                  |
| 41 |                   |                                                                                                                                                                  |
| 42 |                   |                                                                                                                                                                  |
| 43 |                   |                                                                                                                                                                  |
| 44 |                   |                                                                                                                                                                  |
| 45 |                   |                                                                                                                                                                  |
| 46 |                   |                                                                                                                                                                  |
| 47 |                   |                                                                                                                                                                  |
| 48 |                   |                                                                                                                                                                  |
| 49 |                   |                                                                                                                                                                  |
| 50 |                   |                                                                                                                                                                  |
| 51 |                   |                                                                                                                                                                  |
| 52 |                   |                                                                                                                                                                  |
| 53 |                   |                                                                                                                                                                  |
| 54 |                   |                                                                                                                                                                  |
| 55 |                   |                                                                                                                                                                  |
| 56 |                   |                                                                                                                                                                  |
| 57 |                   |                                                                                                                                                                  |
| 58 |                   |                                                                                                                                                                  |
| 59 |                   |                                                                                                                                                                  |
| 60 |                   |                                                                                                                                                                  |

For peer review only

## Online Supplementary File 1C. Interview guide for the decision maker group

| Topic                                       | Main question                                                                                                                  | Supplementary probing questions                                                                                                                                                                                                                                                                                                                                                                                                                                                                                                                                                                                                                                                           |
|---------------------------------------------|--------------------------------------------------------------------------------------------------------------------------------|-------------------------------------------------------------------------------------------------------------------------------------------------------------------------------------------------------------------------------------------------------------------------------------------------------------------------------------------------------------------------------------------------------------------------------------------------------------------------------------------------------------------------------------------------------------------------------------------------------------------------------------------------------------------------------------------|
| Treatment for hip osteoarthritis (surgery)  | What do you think about surgery as treatment for hip osteoarthritis?                                                           | <ol style="list-style-type: none"> <li>1. How do you experience the patients' perception of surgery (THA) as treatment for hip osteoarthritis?</li> <li>2. What do you consider to be the advantages of surgery?</li> <li>3. What do you consider to be the disadvantages of surgery?</li> </ol>                                                                                                                                                                                                                                                                                                                                                                                          |
| Treatment for hip osteoarthritis (exercise) | What do you think about exercise as treatment for hip osteoarthritis?                                                          | <ol style="list-style-type: none"> <li>4. How do you experience the patients' perception of exercise as treatment for hip osteoarthritis?</li> <li>5. What do you consider to be the advantages of exercise?</li> <li>6. What do you consider to be the disadvantages of exercise?</li> <li>7. How do you interpret the results of this trial?<sup>20</sup></li> <li>8. How do you think we can avoid this trial to encounter similar diverse attitudes from the "media"/colleagues?</li> <li>9. How have you experienced the debate on surgery and exercise?</li> </ol>                                                                                                                  |
| Participation in a clinical trial           | <p>CASE DESCRIPTION</p> <p>(Detailed information about the PROHIP trial)</p>                                                   | <ol style="list-style-type: none"> <li>10. What is your perception of a trial, in which patients are randomly assigned to surgery (THA) or exercise (with the option of later surgery if needed)?</li> <li>11. What challenges do you consider there are in recruiting for a trial, in which patients are randomized to THA or resistance training?</li> <li>12. In case, the effect of resistance training is lower than surgery (THA), but withholds patients from undergoing surgery because the patients consider the non-surgical treatment as successful - how would you interpret the results?</li> <li>13. What ethical considerations do you think are in this trial?</li> </ol> |
| Patient material and information            | What do you think the patient information should contain?                                                                      | <ol style="list-style-type: none"> <li>14. How would you prefer to receive information about this trial? (Content and method)</li> <li>15. When do you think, it is best to present the information about the trial for potential participants?</li> </ol>                                                                                                                                                                                                                                                                                                                                                                                                                                |
| Implementation of findings                  | Which barriers and facilitators, do you think, affect the implementation of the results from the trial into clinical practice? | <ol style="list-style-type: none"> <li>16. What consequences do you think the trial may have politically in relation to the treatment of patients with hip osteoarthritis?</li> <li>17. What consequences do you think the trial may have on clinical practice?</li> <li>18. What challenges do you think there may be in implementing the results from the trial into clinical practice?</li> <li>19. Which factors do you think will be decisive for a successful implementation of the results from the trial into clinical practice?</li> <li>20. How do you think that we may optimize the implementation of the results from the trial into clinical practice?</li> </ol>           |



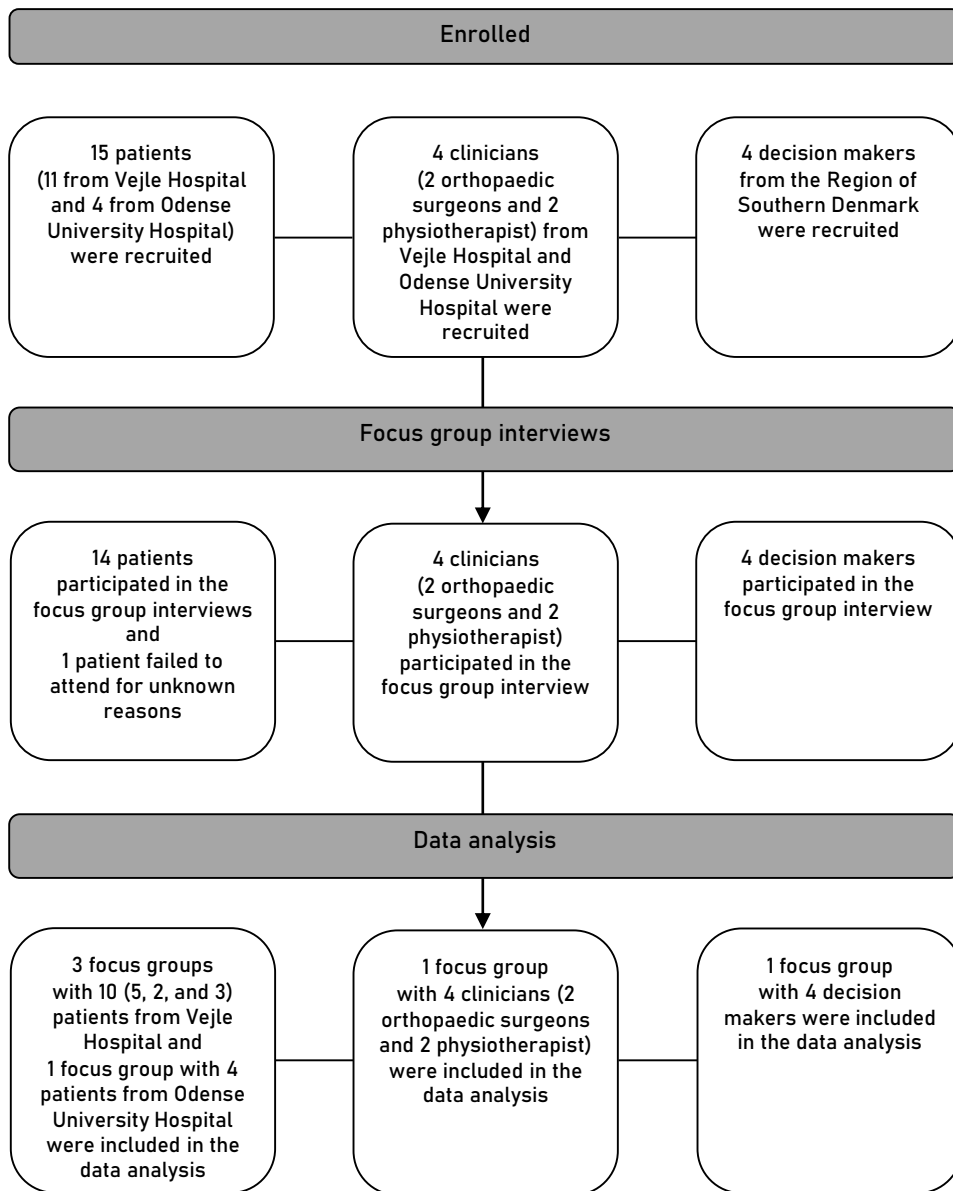

43 **Online Supplementary File 2.** Flowchart of key stakeholder participants in  
44 the study.  
45  
46  
47  
48  
49  
50  
51  
52  
53  
54  
55  
56  
57  
58  
59  
60

## COREQ (CONsolidated criteria for REporting Qualitative research) Checklist

A checklist of items that should be included in reports of qualitative research. You must report the page number in your manuscript where you consider each of the items listed in this checklist. If you have not included this information, either revise your manuscript accordingly before submitting or note N/A.

| Topic                                          | Item No. | Guide Questions/Description                                                                                                                              | Reported on Page No. |
|------------------------------------------------|----------|----------------------------------------------------------------------------------------------------------------------------------------------------------|----------------------|
| <b>Domain 1: Research team and reflexivity</b> |          |                                                                                                                                                          |                      |
| <i>Personal characteristics</i>                |          |                                                                                                                                                          |                      |
| Interviewer/facilitator                        | 1        | Which author/s conducted the interview or focus group?                                                                                                   |                      |
| Credentials                                    | 2        | What were the researcher's credentials? E.g. PhD, MD                                                                                                     |                      |
| Occupation                                     | 3        | What was their occupation at the time of the study?                                                                                                      |                      |
| Gender                                         | 4        | Was the researcher male or female?                                                                                                                       |                      |
| Experience and training                        | 5        | What experience or training did the researcher have?                                                                                                     |                      |
| <i>Relationship with participants</i>          |          |                                                                                                                                                          |                      |
| Relationship established                       | 6        | Was a relationship established prior to study commencement?                                                                                              |                      |
| Participant knowledge of the interviewer       | 7        | What did the participants know about the researcher? e.g. personal goals, reasons for doing the research                                                 |                      |
| Interviewer characteristics                    | 8        | What characteristics were reported about the interviewer/facilitator? e.g. Bias, assumptions, reasons and interests in the research topic                |                      |
| <b>Domain 2: Study design</b>                  |          |                                                                                                                                                          |                      |
| <i>Theoretical framework</i>                   |          |                                                                                                                                                          |                      |
| Methodological orientation and Theory          | 9        | What methodological orientation was stated to underpin the study? e.g. grounded theory, discourse analysis, ethnography, phenomenology, content analysis |                      |
| <i>Participant selection</i>                   |          |                                                                                                                                                          |                      |
| Sampling                                       | 10       | How were participants selected? e.g. purposive, convenience, consecutive, snowball                                                                       |                      |
| Method of approach                             | 11       | How were participants approached? e.g. face-to-face, telephone, mail, email                                                                              |                      |
| Sample size                                    | 12       | How many participants were in the study?                                                                                                                 |                      |
| Non-participation                              | 13       | How many people refused to participate or dropped out? Reasons?                                                                                          |                      |
| <i>Setting</i>                                 |          |                                                                                                                                                          |                      |
| Setting of data collection                     | 14       | Where was the data collected? e.g. home, clinic, workplace                                                                                               |                      |
| Presence of non-participants                   | 15       | Was anyone else present besides the participants and researchers?                                                                                        |                      |
| Description of sample                          | 16       | What are the important characteristics of the sample? e.g. demographic data, date                                                                        |                      |
| <i>Data collection</i>                         |          |                                                                                                                                                          |                      |
| Interview guide                                | 17       | Were questions, prompts, guides provided by the authors? Was it pilot tested?                                                                            |                      |
| Repeat interviews                              | 18       | Were repeat interviews carried out? If yes, how many?                                                                                                    |                      |
| Audio/visual recording                         | 19       | Did the research use audio or visual recording to collect the data?                                                                                      |                      |
| Field notes                                    | 20       | Were field notes made during and/or after the interview or focus group?                                                                                  |                      |
| Duration                                       | 21       | What was the duration of the interviews or focus group?                                                                                                  |                      |
| Data saturation                                | 22       | Was data saturation discussed?                                                                                                                           |                      |
| Transcripts returned                           | 23       | Were transcripts returned to participants for comment and/or                                                                                             |                      |

| Topic                                  | Item No. | Guide Questions/Description                                                                                                        | Reported on Page No. |
|----------------------------------------|----------|------------------------------------------------------------------------------------------------------------------------------------|----------------------|
|                                        |          | correction?                                                                                                                        |                      |
| <b>Domain 3: analysis and findings</b> |          |                                                                                                                                    |                      |
| <i>Data analysis</i>                   |          |                                                                                                                                    |                      |
| Number of data coders                  | 24       | How many data coders coded the data?                                                                                               |                      |
| Description of the coding tree         | 25       | Did authors provide a description of the coding tree?                                                                              |                      |
| Derivation of themes                   | 26       | Were themes identified in advance or derived from the data?                                                                        |                      |
| Software                               | 27       | What software, if applicable, was used to manage the data?                                                                         |                      |
| Participant checking                   | 28       | Did participants provide feedback on the findings?                                                                                 |                      |
| <i>Reporting</i>                       |          |                                                                                                                                    |                      |
| Quotations presented                   | 29       | Were participant quotations presented to illustrate the themes/findings?<br>Was each quotation identified? e.g. participant number |                      |
| Data and findings consistent           | 30       | Was there consistency between the data presented and the findings?                                                                 |                      |
| Clarity of major themes                | 31       | Were major themes clearly presented in the findings?                                                                               |                      |
| Clarity of minor themes                | 32       | Is there a description of diverse cases or discussion of minor themes?                                                             |                      |

Developed from: Tong A, Sainsbury P, Craig J. Consolidated criteria for reporting qualitative research (COREQ): a 32-item checklist for interviews and focus groups. *International Journal for Quality in Health Care*. 2007. Volume 19, Number 6: pp. 349 – 357

**Once you have completed this checklist, please save a copy and upload it as part of your submission. DO NOT include this checklist as part of the main manuscript document. It must be uploaded as a separate file.**

# BMJ Open

## Patient and public involvement to inform the protocol of a clinical trial comparing total hip arthroplasty with exercise: An exploratory qualitative case study

|                                 |                                                                                                                                                                                                                                                                                                                                                                                                                                                                                                                                                                                                                                                                                                                                                                                                                                                                                                                                                                                                                                                                                    |
|---------------------------------|------------------------------------------------------------------------------------------------------------------------------------------------------------------------------------------------------------------------------------------------------------------------------------------------------------------------------------------------------------------------------------------------------------------------------------------------------------------------------------------------------------------------------------------------------------------------------------------------------------------------------------------------------------------------------------------------------------------------------------------------------------------------------------------------------------------------------------------------------------------------------------------------------------------------------------------------------------------------------------------------------------------------------------------------------------------------------------|
| Journal:                        | <i>BMJ Open</i>                                                                                                                                                                                                                                                                                                                                                                                                                                                                                                                                                                                                                                                                                                                                                                                                                                                                                                                                                                                                                                                                    |
| Manuscript ID                   | bmjopen-2022-070866.R1                                                                                                                                                                                                                                                                                                                                                                                                                                                                                                                                                                                                                                                                                                                                                                                                                                                                                                                                                                                                                                                             |
| Article Type:                   | Original research                                                                                                                                                                                                                                                                                                                                                                                                                                                                                                                                                                                                                                                                                                                                                                                                                                                                                                                                                                                                                                                                  |
| Date Submitted by the Author:   | 14-Mar-2023                                                                                                                                                                                                                                                                                                                                                                                                                                                                                                                                                                                                                                                                                                                                                                                                                                                                                                                                                                                                                                                                        |
| Complete List of Authors:       | Frydendal, Thomas; Lillebaelt Hospital - University Hospital of Southern Denmark, Department of Physiotherapy; University of Southern Denmark, Department of Clinical Research<br>Thomsen , Kristine; Lillebaelt Hospital - University Hospital of Southern Denmark, Department of Physiotherapy<br>Mechlenburg, Inger; Aarhus University Hospital, Department of Orthopedic Surgery; Aarhus University, Department of Clinical Medicine<br>Mikkelsen, Lone Ramer; Aarhus University, Department of Clinical Medicine; Silkeborg Regional Hospital, Elective Surgery Centre, Overgaard, Søren; Bispebjerg Hospital, Department of Orthopedic Surgery and Traumatology; University of Copenhagen Faculty of Health and Medical Sciences, Department of Clinical Medicine<br>Ingwersen, Kim Gordon; Lillebaelt Hospital - University Hospital of Southern Denmark, Department of Physiotherapy; University of Southern Denmark, Department of Regional Health Research<br>Myburgh, Cornelius; University of Southern Denmark, Department of Sports Science and Clinical Biomechanics |
| <b>Primary Subject Heading</b>: | Qualitative research                                                                                                                                                                                                                                                                                                                                                                                                                                                                                                                                                                                                                                                                                                                                                                                                                                                                                                                                                                                                                                                               |
| Secondary Subject Heading:      | Research methods, Rheumatology                                                                                                                                                                                                                                                                                                                                                                                                                                                                                                                                                                                                                                                                                                                                                                                                                                                                                                                                                                                                                                                     |
| Keywords:                       | Hip < ORTHOPAEDIC & TRAUMA SURGERY, QUALITATIVE RESEARCH, Musculoskeletal disorders < ORTHOPAEDIC & TRAUMA SURGERY, Clinical trials < THERAPEUTICS                                                                                                                                                                                                                                                                                                                                                                                                                                                                                                                                                                                                                                                                                                                                                                                                                                                                                                                                 |
|                                 |                                                                                                                                                                                                                                                                                                                                                                                                                                                                                                                                                                                                                                                                                                                                                                                                                                                                                                                                                                                                                                                                                    |

SCHOLARONE™  
Manuscripts



I, the Submitting Author has the right to grant and does grant on behalf of all authors of the Work (as defined in the below author licence), an exclusive licence and/or a non-exclusive licence for contributions from authors who are: i) UK Crown employees; ii) where BMJ has agreed a CC-BY licence shall apply, and/or iii) in accordance with the terms applicable for US Federal Government officers or employees acting as part of their official duties; on a worldwide, perpetual, irrevocable, royalty-free basis to BMJ Publishing Group Ltd ("BMJ") its licensees and where the relevant Journal is co-owned by BMJ to the co-owners of the Journal, to publish the Work in this journal and any other BMJ products and to exploit all rights, as set out in our [licence](#).

The Submitting Author accepts and understands that any supply made under these terms is made by BMJ to the Submitting Author unless you are acting as an employee on behalf of your employer or a postgraduate student of an affiliated institution which is paying any applicable article publishing charge ("APC") for Open Access articles. Where the Submitting Author wishes to make the Work available on an Open Access basis (and intends to pay the relevant APC), the terms of reuse of such Open Access shall be governed by a Creative Commons licence – details of these licences and which [Creative Commons](#) licence will apply to this Work are set out in our licence referred to above.

Other than as permitted in any relevant BMJ Author's Self Archiving Policies, I confirm this Work has not been accepted for publication elsewhere, is not being considered for publication elsewhere and does not duplicate material already published. I confirm all authors consent to publication of this Work and authorise the granting of this licence.

1  
2  
3  
4 **Article Type:** Original research article  
5  
6  
7

8  
9 **Patient and public involvement to inform the protocol of a clinical trial**  
10  
11 **comparing total hip arthroplasty with exercise: An exploratory qualitative**  
12  
13 **case study**  
14

15  
16 Thomas Frydendal, PT, MSc<sup>1,2,3,\*</sup>; Kristine Sloth Thomsen, PT, MSc<sup>1</sup>; Inger  
17  
18 Mechlenburg, PhD, DMSc<sup>4,5</sup>; Lone Ramer Mikkelsen, PhD<sup>5,6</sup>; Søren Overgaard, MD,  
19  
20 DMSc<sup>7,8,9</sup>; Kim Gordon Ingwersen, PhD<sup>1,3,10</sup>; Corrie Myburgh, PhD<sup>11,12</sup>  
21  
22

23 <sup>1</sup>Department of Physiotherapy, Lillebaelt Hospital – University Hospital of Southern Denmark, Vejle Hospital,  
24 Denmark

25 <sup>2</sup>Department of Clinical Research, University of Southern Denmark, Odense, Denmark.

26 <sup>3</sup>Section for Biostatistics and Evidence-Based Research, the Parker Institute, Bispebjerg and Frederiksberg Hospital,  
27 Copenhagen, Denmark

28 <sup>4</sup>Department of Orthopedic Surgery, Aarhus University Hospital, Aarhus, Denmark

29 <sup>5</sup>Department of Clinical Medicine, Aarhus University, Aarhus, Denmark

30 <sup>6</sup>Elective Surgery Centre, Silkeborg Regional Hospital, Silkeborg, Denmark

31 <sup>7</sup>Department of Orthopedic Surgery and Traumatology, Copenhagen University Hospital, Bispebjerg Hospital,  
32 Copenhagen, Denmark

33 <sup>8</sup>Department of Clinical Medicine, Faculty of Health and Medical Sciences University of Copenhagen, Copenhagen,  
34 Denmark

35 <sup>9</sup>Department of Orthopedic Surgery and Traumatology, Odense University Hospital, Odense, Denmark

36 <sup>10</sup>Department of Regional Health Research, University of Southern Denmark, Odense, Denmark

37 <sup>11</sup>Department of Sport Science and Clinical Biomechanics, University of Southern Denmark, Odense, Denmark

38 <sup>12</sup>The Chiropractic Knowledge Hub, Odense, Denmark  
39  
40  
41  
42  
43  
44  
45

46 **Manuscript Word Count:** 4366 words; **Abstract Word Count:** 292 words; **Number**  
47  
48 **of Tables/Figures:** 5 Tables/Figures  
49  
50  
51

52  
53 **\*Corresponding Author:** Address for correspondence to Thomas Frydendal, PT, MSc,  
54  
55 Vejle Hospital, Beriderbakken 4, 7100 Vejle, Denmark. E-mail:  
56  
57 thomas.frydendal@rsyd.dk. Phone: +45 79 40 61 51.  
58  
59  
60

## ABSTRACT

**Objective:** To explore patient, clinician, and decision maker perceptions on a clinical trial evaluating the effectiveness of total hip arthroplasty (THA) compared with exercise to inform the trial protocol.

**Design and Methods:** This is an exploratory qualitative case study using a constructivistic paradigm. Participants were enrolled into three key stakeholder groups: patients eligible for THA, clinicians, and decision makers. Focus group interviews were conducted according to group status using semi-structured interview guides. Interviews were recorded, transcribed verbatim, and thematic analysed.

**Findings:** We conducted 4 focus group interviews with 14 patients, 1 focus group interview with 4 clinicians (2 orthopaedic surgeons and 2 physiotherapists), and 1 focus group interview with 4 decision makers. Two main themes were generated. *'Treatment expectations and beliefs impact management choices'* covered three supporting codes: Treatment without surgery is unlikely to lead to recovery; Clinician authority impacts the management narrative; The 'surgery versus exercise' debate. *'Factors influencing clinical trial integrity and feasibility'* highlighted three supporting codes: Who is considered eligible for surgery?; Facilitators and barriers for surgery and exercise in a clinical trial context; Improvements in hip pain and hip function are the most important outcomes.

**Conclusions:** Based on key stakeholder treatment expectations and beliefs, we implemented three main strategies to improve the methodological rigorousness of our trial protocol. Firstly, we added an observational study investigating the generalizability to address a potential low enrolment rate. Secondly, we developed an enrolment procedure using generic guidance and balanced narrative conveyed by an independent

1  
2  
3  
4 clinician to facilitate communication of clinical equipoise. Thirdly, we adopted change in  
5  
6 hip pain and function as the primary outcome. These findings highlight the value of  
7  
8 patient and public involvement in the development of trial protocols to reduce bias in  
9  
10 comparative clinical trials evaluating surgical and non-surgical management.  
11  
12  
13  
14  
15

## 16 **STRENGTHS AND LIMITATIONS OF THIS STUDY**

- 17  
18 • This qualitative patient and public involvement study was used to inform the  
19  
20 protocol of a randomised controlled trial evaluating the effectiveness of total hip  
21  
22 arthroplasty compared with exercise.  
23  
24
- 25 • Focus group interviews were performed with patients, clinicians, and decision  
26  
27 makers to provide multiple perspectives and extend the scope of the findings.  
28  
29
- 30 • An independent qualitative researcher conducted the data analysis to improve  
31  
32 neutrality in the interpretation and development of themes and supporting codes.  
33  
34
- 35 • Only one focus group interview was conducted for each of the groups with  
36  
37 clinicians and decision makers due to time limitations. This may impact the  
38  
39 certainty of achieving data saturation in these two responder groups.  
40  
41
- 42 • All participants in the patient group were scheduled for total hip arthroplasty and  
43  
44 3 out of 14 had previously undergone this procedure, which may have influenced  
45  
46 their perceptions.  
47  
48  
49  
50

### 51 **Keywords**

52  
53 Hip Osteoarthritis, Total Hip Arthroplasty, Exercise, Patient and Public Involvement,  
54  
55 Qualitative Study  
56  
57  
58  
59  
60



## INTRODUCTION

Hip osteoarthritis (OA) is a major cause of pain, disability, and decreased quality-of-life<sup>1</sup>. The overall prevalence of hip OA is 11%,<sup>2</sup> and the disorder is the leading reason for undergoing total hip arthroplasty (THA) surgery.<sup>3</sup> The number of THAs performed each year has increased dramatically over the past decade with more than one million procedures annually undertaken worldwide.<sup>3</sup> THA is considered an effective treatment to reduce pain, improve physical function, and increase quality-of-life for severe hip OA.<sup>4,5</sup> However, there is a risk of severe complications and up to 23% of the patients report long-term residual pain after THA surgery.<sup>3,6</sup>

Guidelines recommend exercise and patient education as first-line treatment in the management of hip OA.<sup>7,8</sup> Specifically, progressive resistance training (PRT) appears to provide moderate improvements in patient-reported outcomes and functional performance even in patients with severe hip OA.<sup>9,10</sup> Furthermore, exercise and patient education might postpone the need for surgery and reduce patients' willingness to undergo THA,<sup>11,12</sup> but less than 40% of the patients are recommended or referred to first-line treatment.<sup>13</sup> Despite the large number of THA surgeries performed annually, no clinical trial has investigated the comparative effectiveness of THA and non-surgical treatment in the management of hip OA.<sup>14</sup> This comparison is of importance as non-surgical treatment has been shown to be a viable alternative to surgery for many musculoskeletal disorders.<sup>15</sup>

Several clinician and patient barriers to participation in clinical trials have been identified. Main clinician barriers comprise lack of support staff and inadequate research training and difficulty with the consent procedure, while notable patient barriers include treatment preferences, worry caused by uncertainty, and concerns about

1  
2  
3  
4 information and consent.<sup>16</sup> Moreover, clinical trials comparing surgical procedures with  
5 non-surgical treatment have suffered from low enrolment rates and difficulties in  
6 retaining participants to their allocated treatments.<sup>17-21</sup> With limited participation in these  
7 sort of clinical trials, a risk exists for research inefficiency and possibly biased findings  
8 that may drive clinical decision making.<sup>22</sup>

9  
10  
11  
12  
13  
14  
15  
16 Patient and public involvement strategies involve key stakeholders in the  
17 design, conduct, and dissemination of research.<sup>23 24</sup> Evidence suggests that patient and  
18 public involvement strategies have the potential to increase enrolment rates of  
19 participants and improve selection of outcome measures.<sup>23 24</sup> However, only few clinical  
20 trials within the orthopaedic area have reported use of patient and public involvement,<sup>25</sup>  
21 although more than 90% of the authors of surgical trials claim some incorporation of such  
22 strategies.<sup>23</sup> Thus, based on the benefits and paucity of current evidence in this area  
23 effective patient and public involvement strategies may help improve clinical trials  
24 comparing surgery to non-surgical treatment.

25  
26  
27  
28  
29  
30  
31  
32  
33  
34  
35  
36  
37 To our knowledge, this is the first qualitative patient and public involvement  
38 study preceding a clinical trial comparing surgical to non-surgical treatment as previous  
39 trials did not report any engagement from patients and other key stakeholders.<sup>17-21</sup>  
40 Therefore, we aimed to explore patient, clinician, and decision maker perceptions on a  
41 clinical trial evaluating the effectiveness of THA compared with exercise to inform the  
42 trial protocol.

## METHODS

### Study design

We used an explorative qualitative design based on a constructivistic paradigm as data was co-constructed by the researchers and participants.<sup>26</sup> This approach was used as we aimed to gain a detailed understanding of a multifaceted phenomenon by exploring the experiences, attitudes, and beliefs of the key stakeholder participants. This study was reported in agreement with the Consolidated Criteria for Reporting Qualitative Research (COREQ) checklist,<sup>27</sup> and preceded the Progressive Resistance Training Versus Total Hip Arthroplasty (PROHIP) trial.<sup>28</sup> The PROHIP trial was approved by The Regional Committees on Health Research Ethics for Southern Denmark (Project-ID: S-20180158) and registered on ClinicalTrials.gov (NCT04070027). This study was approved by The Danish Data Protection Agency (Journal No 18/23994), while no ethical approval was required according to the Danish Act on Research Ethics. Written informed consent was obtained from each participant in accordance with the Helsinki Declaration.

### Sampling and participants

Participants were enrolled into three key stakeholder groups: patients, clinicians (orthopaedic surgeons and physiotherapists), and decision makers (members of a political party or non-governmental organisation) (**Figure 1**). Key stakeholders were engaged at the level of consultation to obtain input on several research decisions and implement the findings into our trial protocol.<sup>29</sup>

*Please insert Figure 1 about here*

1  
2  
3  
4 Patients were recruited consecutively by orthopaedic surgeons from the  
5  
6 orthopaedic departments at Vejle Hospital and Odense University Hospital. The  
7  
8 eligibility criteria was similar to the PROHIP trial to ensure a typical patient response.  
9  
10 The complete list of inclusion and exclusion criteria have been published previously.<sup>28</sup>  
11  
12 Briefly, eligible patients were aged  $\geq 50$  years, diagnosed with clinical and radiographic  
13  
14 hip OA, and considered eligible for THA.  
15  
16

17  
18 A convenience sample of clinicians not involved in the design of the  
19  
20 PROHIP trial with  $>2$  years of clinical experience in treating patients with hip OA from  
21  
22 the orthopaedic and physiotherapy departments at the two hospitals were contacted  
23  
24 personally face-to-face or by email and invited to participate in the study.  
25  
26

27  
28 A purposive sample of decision makers with  $>2$  years of political  
29  
30 experience from the spectrum of political parties and relevant non-governmental  
31  
32 organisations from the Region of Southern Denmark were approached by email and  
33  
34 invited to participate in the study.  
35  
36

### 37 38 39 **Data collection**

40  
41 Data were collected through open-ended, semi-structured focus group interviews  
42  
43 allowing the advantage of dynamic group interactions.<sup>30</sup> Each interview included two to  
44  
45 five key stakeholders, lasted between 90 to 120 minutes, and was conducted from  
46  
47 September 2018 to March 2019 by a female physiotherapist (KST), MSc with 10 years  
48  
49 of clinical orthopaedic experience and trained in qualitative methodologies. Prior to each  
50  
51 focus group interview, the interviewers' profession was disclosed to the key stakeholders.  
52  
53 The interviewer was neither affiliated with the PROHIP trial group nor had previous  
54  
55 interaction with key stakeholders. Group specific open-ended semi-structured interview  
56  
57  
58  
59  
60

1  
2  
3  
4 guides (**online Supplementary File 1**) were developed by the first author (TF) to explore  
5 topics related to the PROHIP trial.<sup>31</sup> The number of focus group interviews were not  
6 predetermined for the patients, whereas one interview was planned for the clinicians and  
7 decision makers due to pragmatic reasons. For the patients, the semi-structured interview  
8 guide was continuously adjusted after each focus group based on field notes made during  
9 the interviews by the first author. Data saturation was considered attained, if no new  
10 themes, perspectives, and knowledge developed within two consecutive interviews. All  
11 interviews were digitally audio-recorded, transcribed verbatim, and translated into  
12 English by an independent linguist. The transcripts and findings were not returned to the  
13 key stakeholders for comments and validation because we expected that their reflective  
14 answers would develop during the focus group interview. Quotes from the interviews are  
15 used to support claims and illustrate the generated themes and supporting codes. All data  
16 were pseudo-anonymized and stored in digital format on a password-protected hospital  
17 server conforming to current data protection standards. The focus group interviews were  
18 performed face-to-face in undisturbed conference rooms at Vejle Hospital and Odense  
19 University Hospital, according to group status. The interviewer and the first author were  
20 present during all focus group interviews.

21  
22  
23  
24  
25  
26  
27  
28  
29  
30  
31  
32  
33  
34  
35  
36  
37  
38  
39  
40  
41  
42  
43  
44  
45  
46  
47  
48  
49  
50  
51  
52  
53  
54  
55  
56  
57  
58  
59  
60

Key stakeholder characteristics were obtained using a participant-reported questionnaire. Additionally, the patient group completed the Oxford Hip Score (OHS)<sup>32</sup> and Hip disability and Osteoarthritis Outcome Score (HOOS).<sup>33</sup>

### **Data analysis**

An independent qualitative researcher (CM) not affiliated with the PROHIP trial group conducted a code book thematic analysis using an inductive approach with no

1  
2  
3  
4 predetermined themes following the six-step framework described by Braun and Clark.<sup>34</sup>  
5  
6 <sup>35</sup> Initially, this process involved familiarisation with the data by reading and re-reading  
7  
8 the transcripts. This was followed by generating initial codes, in which line-by-line  
9  
10 inductive coding was performed on interviews to define and develop a code list. This  
11  
12 code list was used to code subsequent interviews deductively, but according to the  
13  
14 constant comparison method, as new codes developed these were again applied across  
15  
16 all focus group interviews.<sup>36</sup> As the analysis progressed, coding shifted from descriptive  
17  
18 to explanatory, resulting in a number of axial codes. Then related axial codes were  
19  
20 organised into preliminary main themes. Lastly, main themes and supporting codes were  
21  
22 refined and a final thematic network was developed followed by writing of the  
23  
24 manuscript.<sup>34 35</sup> The analysis was performed using Computer Assisted Qualitative Data  
25  
26 Analysis software (CAQDAS, Atlas Ti, Version 8).  
27  
28  
29  
30  
31  
32  
33

### 34 **Implementation of findings into the trial protocol**

35  
36 After the data analysis was completed, the generated thematic network comprising main  
37  
38 themes and supporting codes were presented to the PROHIP trial group. We assessed  
39  
40 these findings and identified methodological implementation considerations and  
41  
42 strategies for the trial protocol and categorized these across relevant identified domains.  
43  
44 Disagreements were resolved by discussion until consensus.  
45  
46  
47  
48  
49

### 50 **Patient and public involvement**

51  
52 Patients or members of the public were not involved in the design, conduct, reporting or  
53  
54 dissemination of this qualitative study, but constituted the patient and public involvement  
55  
56 strategy used in the development of the PROHIP trial.<sup>28</sup>  
57  
58  
59  
60

## FINDINGS

We conducted 4 focus group interviews with a total of 14 patients, 1 focus group interview with 4 clinicians (2 orthopaedic surgeons and 2 physiotherapists), and 1 focus group interview with 4 decision makers (**online Supplementary File 2**). Participant characteristics are presented in **Table 1**. Two main themes were generated from the thematic framework. *'Treatment expectations and beliefs impact management choices'* covered three supporting codes: Treatment without surgery is unlikely to lead to recovery; Clinician authority impacts the management narrative; The 'surgery versus exercise' debate. *'Factors influencing clinical trial integrity and feasibility'* highlighted three supporting codes: Who is considered eligible for surgery?; Facilitators and barriers for surgery and exercise in a clinical trial context ; Improvements in hip pain and hip function are the most important outcomes (**Figure 2**).

**Table 1. Characteristics of the Key Stakeholder Groups.\***

| Characteristic                                         | Patients<br>(N=14) | Clinicians<br>(N=4) | Decision Makers<br>(N=4) |
|--------------------------------------------------------|--------------------|---------------------|--------------------------|
| Female sex — no. (%)                                   | 8 (57)             | 1 (25)              | 2 (50)                   |
| Age — yr                                               | 68.5 [51.0-80.0]   | 48.0 [38.00-52.00]  | 56.5 [23.0-68.0]         |
| Clinical and radiographic hip osteoarthritis — no. (%) | 14 (100)           | 0 (0)               | 0 (0)                    |
| Previous total hip arthroplasty — no. (%)              | 3 (21)             | 0 (0)               | 0 (0)                    |
| OHS‡                                                   | 21.5 [10.0-38.0]   | -                   | -                        |
| HOOS subscale scores¶                                  |                    |                     |                          |
| Pain                                                   | 42.5 [20.0-77.5]   | -                   | -                        |
| Symptoms                                               | 32.5 [15.0-80.0]   | -                   | -                        |
| Function in activities of daily living                 | 47.8 [20.6-86.8]   | -                   | -                        |
| Hip-related quality of life                            | 31.3 [12.5-68.8]   | -                   | -                        |
| Function in sports and recreation                      | 25.0 [0-62.5]      | -                   | -                        |
| Clinical profession — no. (%)                          |                    |                     |                          |
| Orthopaedic surgeon                                    | -                  | 2 (50)              | -                        |
| Physiotherapist                                        | -                  | 2 (50)              | -                        |
| Clinical experience – yr                               | -                  | 16.0 [3.0-18.0]     | -                        |
| Hospital affiliation — no. (%)                         |                    |                     |                          |
| Vejle Hospital                                         | -                  | 2 (50)              | -                        |
| Odense University Hospital                             | -                  | 2 (50)              | -                        |
| Political experience – yr                              | -                  | -                   | 5.0 [3.0-5.0]            |
| Political or non-governmental affiliation — no. (%)    |                    |                     |                          |
| The Liberal Party of Denmark (V)                       | -                  | -                   | 1 (25)                   |
| The Danish People's Party (O)                          | -                  | -                   | 1 (25)                   |
| The Social Democratic Party (A)                        | -                  | -                   | 1 (25)                   |
| The Danish Rheumatism Association                      | -                  | -                   | 1 (25)                   |

\* Values are median [range] unless otherwise indicated.

‡ The Oxford Hip Score (OHS) ranges from 0 to 48, with higher scores indicating better disease status.

¶ For all five subscales, the Hip disability and Osteoarthritis Outcome Score (HOOS) ranges from 0 to 100, with higher scores indicating better disease status.

*Please insert Figure 2 about here*



## Treatment expectations and beliefs impact management choices

### *Treatment without surgery is unlikely to lead to recovery*

Patients had high expectations of a complete reduction of hip pain, fast return to desired activities-of-daily-living and functional performance approximating their pre-symptomatic state after THA surgery.

*'I find it important to get rid of the pain, but also to get back to being physically active. Those two are equally important to me. I think. Because it used to be such a big part of my life'* (Patient 3, age 60-69 years).

Patients had uncertain and/or sceptical expectations about exercise, but believed that exercise could lead to improvements.

*'I have not been informed about the possibility of exercising the pain away'*  
(Patient 5, age 70-79 years).

Patients and decisions makers perceived exercise as a more appropriate treatment for mild to moderate stages of hip OA or as an adjunct to THA in the pre- and/or postoperative phases to improve the outcome of THA.

*'But if a hip is in a better state, then there is still a possibility to improve the person's condition without surgery. At the early stages of hip deterioration, exercise may seem like the best way forward'* (Decision maker 3, age 60-69).

1  
2  
3  
4  
5  
6  
7 *'It is important to do exercise both before and after the surgery, to make*  
8 *your muscles as powerful as possible'* (Patient 1, age 60-69 years).  
9  
10

11  
12  
13 Patients with severe hip pain perceived themselves as highly disabled and considered any  
14 treatment without THA surgery unlikely to lead to their recovery.  
15  
16

17  
18  
19  
20 *'Having a defect hip is constraining both physically and mentally. Totally*  
21 *disabling.'* (Patient 6, age 60-69 years).  
22  
23

24  
25  
26  
27 *'I don't believe that it is possible to remove the symptoms just by means of*  
28 *exercising. I don't believe that is possible'* (Patient 7, age 50-59 years).  
29  
30

#### 31 32 33 *Clinician authority impacts the management narrative*

34  
35 Patients expressed a need to be guided verbally through the trial protocol and information  
36 by a competent and trustworthy clinician. In this regard, the orthopaedic surgeons were  
37 seen as the most authoritative clinician.  
38  
39  
40  
41  
42

43  
44  
45 *'When I consulted the orthopaedic surgeon, the doctor. We were told*  
46 *absolutely everything about it [THA surgery], and he does it very well.*  
47  
48 *There was no doubt in my mind'* (Patient 5, age 70-79 years).  
49  
50  
51

52  
53  
54 Orthopaedic surgeons tended to describe THA as a core treatment, with exercise being  
55 considered as a postsurgical adjunct treatment, and thus reinforced the perception of their  
56  
57  
58  
59  
60

1  
2  
3  
4 status as the most authoritative clinician group by virtue of their control over the THA  
5  
6 treatment narrative.  
7  
8  
9

10  
11 *'It is quite clearly "the surgery of the century". If the surgery is made on*  
12 *the right patient, it is both a safe and effective surgery. The degree of*  
13 *satisfaction is generally very high, both seen from the patients and the*  
14 *surgeons' perspectives' (Clinician [Orthopaedic surgeon 2], age 40-49*  
15 *years).*  
16  
17  
18  
19  
20  
21  
22  
23  
24

25 Patient respondents highlighted that both orthopaedic surgeons and physiotherapists  
26  
27 tended to use a management narrative suited to their preferred treatment and at times these  
28  
29 narratives were juxtaposed.  
30  
31  
32  
33

34 *'The orthopaedic surgeon said: You can get a new hip, but I suggest you try*  
35 *to exercise for a period and then you can return to me when the pain gets*  
36 *too severe. The physiotherapists, they are very eager avoid surgery. At least*  
37 *the ones I have met, they have told me that I can exercise the pain away'*  
38  
39  
40  
41  
42  
43  
44 (Patient 2, age 50-59 years).  
45  
46  
47

48 Clinicians were aware of the potential impact of their authority on patient perceptions of  
49  
50 treatment effectiveness. This practice was viewed with concern as the PROHIP trial relies  
51  
52 on trial participants perceiving THA and exercise as equal treatments.  
53  
54  
55  
56  
57  
58  
59  
60

1  
2  
3  
4           *'It is possible to talk about the different possibilities in a fairly objective*  
5           *way through a standardized text. And then it is important not to laugh...*  
6  
7           *when the patient asks us, what would you choose?'* (Clinician [Orthopaedic  
8  
9           surgeon 2], age 40-49 years).

### 15           *The 'surgery versus exercise' debate*

16  
17 Clinicians were aware of an ongoing discourse, pitching other surgical procedures and  
18 exercise against one another. Both the orthopaedic surgeons and physiotherapists agreed  
19 that fuelling a debate of choosing one approach over another was not a desirable in the  
20 context of the PROHIP trial.  
21  
22  
23  
24  
25  
26  
27  
28  
29

30           *'This became quickly exercise against surgery, very much head-to-head and*  
31           *completely out of context of reality. We did not recognize, nor in the media*  
32           *the picture they created with the interpretation that you should rather*  
33           *exercise or carelessly get surgery'* (Clinician [Physiotherapist 2], age 30-  
34  
35  
36  
37  
38  
39           39 years).

40  
41  
42  
43 Rather than pitching the two treatments against one another, an orthopaedic surgeon  
44 highlighted that it was important to develop a narrative emphasizing surgery and exercise  
45 as fundamentally different, yet complementary.  
46  
47  
48  
49  
50

51  
52           *'But the question is whether surgery and exercise can be considered equal.*  
53           *Because surgery is dangerous, exercise is not very dangerous. Surgery is*  
54           *invasive, irreversible. Exercise is something you try out, and if it does not*  
55  
56  
57  
58  
59  
60

1  
2  
3  
4 *work, then you can have surgery'* (Clinician [Orthopaedic surgeon 2], age  
5  
6 40-49 years)  
7  
8  
9

## 10 11 **Factors influencing clinical trial integrity and feasibility**

12  
13 *Who is considered eligible for surgery?*

14  
15  
16 Patients highlighted variations in the nature of hip OA, and perceived that radiographic  
17  
18 findings were the primary indication criteria for determining treatment selection.  
19

20  
21  
22  
23 *'If a person is in pain and has a lot of cartilage left, then this person should*  
24  
25 *be offered exercise and surgery should be postponed.* (Patient 1, age 60-69  
26  
27 years).  
28

29  
30  
31  
32 Physiotherapists questioned the indication criteria for THA used in the clinical  
33  
34 assessment, since they had observed a substantial variation in hip pain and functional  
35  
36 performance among patients prior to surgery.  
37

38  
39  
40  
41 *'At the information meetings, we see people who walk normally, and we*  
42  
43 *then wonder why these people need new hips, because this person does not*  
44  
45 *seem to be in pain, nor to be functionally impaired'* (Clinician  
46  
47 [Physiotherapist 1], age 50-59 years).  
48  
49

50  
51  
52 For orthopaedic surgeons, improvements from exercise was associated with an incorrect  
53  
54 diagnosis or considered as secondary to hip OA.  
55  
56  
57  
58  
59  
60

1  
2  
3  
4           ‘You need to be absolutely certain that the patient suffers from  
5           osteoarthritis. I believe that the patients who experience improvements by  
6           exercise, they suffer from a problem with the soft tissue. Something they  
7           have had in any circumstances or is secondary to the osteoarthritis’  
8  
9  
10  
11  
12  
13  
14           (Clinician [Orthopaedic surgeon 1], age 50-59 years).

### 17           *Facilitators and barriers for surgery and exercise in a clinical trial context*

18  
19  
20           Based on responses, it seemed that younger patients were less likely to select surgery as  
21           first-line management. This appeared to be driven by health beliefs and concerns for the  
22           durability of THA. Patients perceived both THA and exercise as treatments to provide  
23           pain management without usage of analgesics. However, THA was clearly seen as a  
24           means to abolish severe pain, whereas less clarity was observed for exercise as residual  
25           hip pain was viewed as both a driver and barrier for continued adherence. Exercise was  
26           considered a low-risk treatment, while THA was perceived as a last resort treatment with  
27           a risk of serious adverse events. Patients indicated that improvements derived from  
28           exercise would encourage to continued adherence, whereas a failure of exercise to  
29           provide sufficient improvements in hip pain and activities-of-daily living were a driver  
30           for THA. Patients were more likely to undergo THA once presented with radiographic  
31           findings visualizing degenerative changes and/or progression of OA. Finally, patients  
32           considered establishing and maintaining exercise habits as important, and emphasized the  
33           importance of supervision to provide clinical expertise and motivation during exercise  
34           sessions. Potential facilitators and barriers for THA surgery and exercise in the PROHIP  
35           trial are summarized in **Table 2**.

**Table 2.** Facilitators and barriers for surgery and exercise in the Progressive Resistance Training Versus Total Hip Arthroplasty (PROHIP) trial.

|                     | Surgery                           | Illustrative quote(s)                                                                                                                                                                                                                                                                                          | Exercise                           | Illustrative quote(s)                                                                                                                                                                                                                                                                                                    |
|---------------------|-----------------------------------|----------------------------------------------------------------------------------------------------------------------------------------------------------------------------------------------------------------------------------------------------------------------------------------------------------------|------------------------------------|--------------------------------------------------------------------------------------------------------------------------------------------------------------------------------------------------------------------------------------------------------------------------------------------------------------------------|
| <b>Facilitators</b> | Severe hip pain                   | <i>'I am currently in a lot of pain, and I am looking forward to being released from that pain'</i> (Patient 1, age 60-69 years).                                                                                                                                                                              | Patient age                        | <i>'...people who feel too young to have hip surgery... because they see themselves as being physically active and capable of exercising the pain away'</i> (Clinician [Orthopaedic surgeon 2], age 40-49 years).                                                                                                        |
|                     | Low quality-of-life               | <i>'I cannot walk more than 100 meters, even with a cane'</i> (Patient 6, age 60-69 years).                                                                                                                                                                                                                    | Pain management without analgesics | <i>'Those four exercises are very valuable to me... I almost never take pills'</i> (Patient 2, age 50-59 years).                                                                                                                                                                                                         |
|                     | Ineffective first-line management | <i>'I have not been able to reduce my pain by means of exercise or physical activity, I need to have surgery to be able to live a tolerable life'</i> (Patient 6, age 60-69 years).                                                                                                                            | Low risk of adverse events         | <i>'It [exercise] will not harm them, and if they see improvements that is great.'</i> (Clinician [Orthopaedic surgeon 2], age 40-49 years).                                                                                                                                                                             |
|                     | Analgesics dependency             | <i>'I ate so many pills, we agreed that something had to be done'</i> (Patient 2, age 50-59 years).<br><br><i>'They foresee that they will not be forced to take pills and at the same time, they will get well. Therefore, they choose surgery'</i> (Clinician [Orthopaedic surgeon 2], age 40-49 years).     | Perception of improvement          | <i>'If I was able to feel a signification improvement after the 12-weeks exercise program, then I would be motivated to continue'</i> (Patient 5, age 70-79 years).                                                                                                                                                      |
|                     | Diagnostic imaging                | <i>'When I got here the second time and saw the x-rays, I saw how much cartilage had disappeared since last time – in that short period of time - I said to myself that the actual bone may be next in line. I said to myself that there was no point in waiting any longer'</i> (Patient 2, age 50-59 years). | Habitualised exercise              | <i>'Well, naturally I have spoken to other people about exercise, and I have asked them why they do not exercise, and they have a hard time getting started with it. Then I suggest that we go together, because the social aspect of it is very important, for some people at least'</i> (Patient 11, age 70-70 years). |
|                     | Loss of livelihood                | <i>'I may be rejected from the labour market because of my age, and I am not entitled to pension. So, I cannot afford not having surgery now'</i> (Patient 6, age 60-69 years).                                                                                                                                | Supervision                        | <i>'It is also beneficial to have the presence of a professional person who can inform us about how the specific exercises help you, ...where we are supposed to feel the pain if we do them correctly, which muscle is used and how to recognize this muscle'</i> (Patient 4, age 70-79 years).                         |
|                     |                                   |                                                                                                                                                                                                                                                                                                                | Context of exercise                | <i>'I would appreciate to be in a place together with a group of people,</i>                                                                                                                                                                                                                                             |

|                 |                        |                                                                                                                                                                                                                                                                                                                                                                                        |                                 |                                                                                                                                                                                                                                                                                                                                                                                                                                                                                                                |
|-----------------|------------------------|----------------------------------------------------------------------------------------------------------------------------------------------------------------------------------------------------------------------------------------------------------------------------------------------------------------------------------------------------------------------------------------|---------------------------------|----------------------------------------------------------------------------------------------------------------------------------------------------------------------------------------------------------------------------------------------------------------------------------------------------------------------------------------------------------------------------------------------------------------------------------------------------------------------------------------------------------------|
|                 |                        |                                                                                                                                                                                                                                                                                                                                                                                        |                                 | <p>where one person would instruct the others. And if you meet with a group of people several times, then you feel like being part of a community, and you can talk about the same things... That motivates me' (Patient 2, age 50-59 years).</p>                                                                                                                                                                                                                                                              |
|                 |                        |                                                                                                                                                                                                                                                                                                                                                                                        | Tracking and gamification       | <p>'It matters a lot, I think. Just like when you use a pedometer or a health app, I like that. I like to be able to see the result of my efforts... like Endomondo – get notified about having completed something' (Patient 3, age 60-69 years).</p>                                                                                                                                                                                                                                                         |
| <b>Barriers</b> | Patient age            | <p>'...the uncertainty about whether the hip will last 10, 15, 20 years, and whether I will be able to get a new replacement at that time' (Patient 2, age 50-59 years).</p> <p>'I am also concerned about the durability of the total hip arthroplasty, because wearing out an artificial hip would result in a second surgery' (Clinician [Physiotherapist 1], age 50-59 years).</p> | Too much or too little hip pain | <p>'I have to say that when you are in pain, it is easy to exercise. But then when you don't feel pain, then you tend to forget to do your exercises one day, and then next day and so on. So, when everything is fine, then I have a hard time getting motivated to do exercises' (Patient 1, age 60-69 years).</p> <p>'Some people benefit a lot from exercise, but other people come back to me and explain that exercise only worsened the pain' (Clinician [Orthopaedic surgeon 2], age 40-49 years).</p> |
|                 | Risk of adverse events | <p>'A small risk of the surgery not being successful. That the pain ends up being much worse than before. I think that we all fear that... It would be so devastating if that should happen to us' (Patient 2, age 50-59 years).</p> <p>'Well, if the result is a foot drop, then I will not consider the surgery a success' (Patient 7, age 50-59 years).</p>                         | Low motivation                  | <p>'What is bad for me is that I always come up with a good excuse for not going... working out at home does not work for me, it is better if I go to a fitness centre with other people around' (Patient 3, age 60-69 years).</p>                                                                                                                                                                                                                                                                             |
|                 |                        |                                                                                                                                                                                                                                                                                                                                                                                        | Continuity interruptions        | <p>'...doing exercises in the fitness centre. But, I have also... Maybe I have taken some breaks, I could have put more efforts into it' (Patient 3, age 60-69 years).</p>                                                                                                                                                                                                                                                                                                                                     |



1  
2  
3  
4 *Improvements in hip pain and hip function are the most important outcomes*

5  
6 Patients and clinicians indicated change in hip pain and hip function as the most important  
7  
8  
9 outcomes to evaluate the treatment effect of surgery or exercise.  
10

11  
12  
13 *'My biggest problem is that I feel pain in all the different kinds of*  
14 *movements I do. No matter what kind of movement I do, I feel the pain'*  
15  
16  
17  
18 (Patient 12, age 50-59 years).  
19

20  
21  
22 Patients and clinicians also highlighted quality-of-life, functional performance (gait),  
23  
24 patient acceptable symptom state, muscle strength, treatment crossover (i.e. number of  
25  
26 THA surgeries in the exercise group), return-to-work, and leg-length discrepancy as other  
27  
28 meaningful outcomes to assess in the PROHIP trial.  
29  
30

31  
32  
33  
34 **Methodological implementation strategies for the trial protocol**

35  
36 Based on our data, we identified four domains for methodological implementation  
37  
38 strategies to optimize the PROHIP trial protocol, and these were: patient 'buy in',  
39  
40 enrolment strategies, patient information materials, and important clinical outcomes. The  
41  
42 domains, their thematic association and supporting coding are illustrated in **Table 3**.  
43  
44  
45  
46  
47  
48  
49  
50  
51  
52  
53  
54  
55  
56  
57  
58  
59  
60

**Table 3.** Methodological implications derived from the listed domains, main themes and supporting codes used to inform the Progressive Resistance Training Versus Total Hip Arthroplasty (PROHIP) trial protocol.

| Domain               | Main theme                                                                                                                       | Supporting code                                                                                                                                                                                                                                                                                        | Methodological implications for the PROHIP trial protocol                                                                                                                                                                                                                                                                                                                                                                                                                                                                                            |
|----------------------|----------------------------------------------------------------------------------------------------------------------------------|--------------------------------------------------------------------------------------------------------------------------------------------------------------------------------------------------------------------------------------------------------------------------------------------------------|------------------------------------------------------------------------------------------------------------------------------------------------------------------------------------------------------------------------------------------------------------------------------------------------------------------------------------------------------------------------------------------------------------------------------------------------------------------------------------------------------------------------------------------------------|
| Patient 'buy in'     | Treatment expectations and beliefs impact management choices<br><br>Factors influencing clinical trial integrity and feasibility | Treatment without surgery is unlikely to lead to recovery<br><br>Clinician authority impacts the management narrative<br><br>The 'surgery versus exercise' debate<br><br>Who is considered eligible for surgery?<br><br>Facilitators and barriers for surgery and exercise in a clinical trial context | Guided implementation of a parallel observational study investigating the generalizability of the clinical trial, since many patients probably may decline participation in the trial.<br><br>Guided development of retention procedures (i.e. instructions of study personnel to encourage patient completion), statistical analysis plan (i.e. handling of missing data, sensitivity and exploratory analyses, and subgroup and causal mediation analysis), and exercise protocol (i.e. effective supervision and habitualised exercise protocol). |
| Enrolment strategies | Treatment expectations and beliefs impact management choices<br><br>Factors influencing clinical trial integrity and feasibility | Clinician authority impacts the management narrative<br><br>The 'surgery versus exercise' debate<br><br>Who is considered eligible for surgery?                                                                                                                                                        | Guided development of instruction and training strategy in the enrolment procedures.<br><br>Guided implementation of generic guidance and neutral narrative during enrolment procedures to provide verbal information about the trial.<br><br>Guided clinician roles in enrolment procedures (i.e. eligibility assessment, provider of trial information to the patients) and selection of an independent clinician group to provide detailed verbal information about the trial to facilitate communication of clinical equipoise.                  |

|                               |                                                                                                                                  |                                                                                                                                                                                                                                                         |                                                                                                                                                                                                                                                                                                                                                                                                                                                                                                                  |
|-------------------------------|----------------------------------------------------------------------------------------------------------------------------------|---------------------------------------------------------------------------------------------------------------------------------------------------------------------------------------------------------------------------------------------------------|------------------------------------------------------------------------------------------------------------------------------------------------------------------------------------------------------------------------------------------------------------------------------------------------------------------------------------------------------------------------------------------------------------------------------------------------------------------------------------------------------------------|
| Patient information materials | Treatment expectations and beliefs impact management choices<br><br>Factors influencing clinical trial integrity and feasibility | Treatment without surgery is unlikely to lead to recovery<br><br>Clinician authority impacts the management narrative<br><br>The 'surgery versus exercise' debate<br><br>Facilitators and barriers for surgery and exercise in a clinical trial context | Guided and informed content for the written patient materials and this included information on current evidence of treatment effects for surgery and exercise, trial objective and procedures, randomisation process, content of baseline and follow-up sessions, risks and harms, treatment crossover and withdrawal procedures, clinical implications and funding.<br><br>Guided development of the neutral narrative used in the written patient materials to facilitate communication of clinical equipoise. |
| Important clinical outcomes   | Treatment expectations and beliefs impact management choices<br><br>Factors influencing clinical trial integrity and feasibility | Treatment without surgery is unlikely to lead to recovery<br><br>Improvements in hip pain and hip function are the most important outcomes                                                                                                              | Guided selection of hip pain and function as primary outcome.<br><br>Guided selection of hip-related quality-of-life and functional performance (i.e. gait function) as key secondary outcomes<br><br>Guided selection of patient acceptable symptom state and muscle strength as exploratory outcomes.                                                                                                                                                                                                          |

### *Patient 'buy in'*

We identified sampling bias as a potential external validity threat in the clinical trial. In response, a parallel observational study was conceptualized to investigate the generalizability of the clinical trial, since many patients probably may decline participation in the trial. Additionally, we addressed facilitators and barriers for surgery and exercise among patients that could systematically affect retention rates and lead to treatment crossover in the clinical trial. Consequently, in an effort to optimize retention and reduce treatment crossovers, we developed a more focused retention procedure (i.e.

1  
2  
3  
4 instructions of study personnel to encourage patient completion) and tailored exercise  
5  
6 protocol with a greater focus on effective supervision during exercise sessions and  
7  
8 implementation of a habitualised exercise protocol. Furthermore, a nuanced statistical  
9  
10 analysis plan was prioritized in regards to handling of missing data, sensitivity and  
11  
12 exploratory analyses, subgroup and causal mediation analysis.  
13  
14  
15  
16  
17

### 18 *Enrolment strategies*

19  
20 We identified preconceived beliefs and perceptions among clinicians as a potential threat  
21  
22 to sampling in the trial. In response, we implemented an instruction and training strategy  
23  
24 for orthopaedic surgeons and project coordinators in standardized verbal information  
25  
26 about the trial to facilitate communication of equipoise during enrolment procedures.  
27  
28 Focus was placed on the creation of a neutral narrative to be used when verbal information  
29  
30 was provided during enrolment. To encourage clinical equipoise, we provided guidance  
31  
32 to clinicians with respect to their roles during the enrolment process and an independent  
33  
34 clinician group was involved to provide detailed verbal information about the trial.  
35  
36  
37  
38  
39  
40

### 41 *Patient information materials*

42  
43 We identified preconceived beliefs and perceptions among patients that needed to be  
44  
45 addressed in the written patient materials, which covered current evidence of treatment  
46  
47 effects for surgery and exercise, trial objective and procedures, randomization process,  
48  
49 content of baseline and follow-up sessions, risks and harms, treatment crossover and  
50  
51 withdrawal procedures, clinical implications using a balanced a neutral narrative.  
52  
53  
54  
55  
56  
57  
58  
59  
60

### *Important clinical outcomes*

Patient and clinician responses led to three distinct adaptations to the outcomes in the trial protocol. We adopted hip pain and function as primary outcome and implemented hip-related quality-of-life and functional performance (i.e. gait function) as key secondary outcomes. We also included patient acceptable symptom state and muscle strength as exploratory outcomes.

## **DISCUSSION**

### **Main findings**

This novel qualitative patient and public involvement study explored patient, clinician, and decision maker perceptions of a clinical trial evaluating the effectiveness of THA compared with exercise to inform protocol development. Our findings showed that patients with severe pain perceived themselves as highly disabled and considered treatment without THA unlikely. Patients expected a fast recovery with complete reduction of hip pain, restored functional performance, and return to activities-of-daily-living after THA, while more uncertainty and scepticism about the effects of exercise was expressed. All key stakeholders, except the physiotherapists, deemed exercise as most appropriate for mild to moderate stages of hip OA or as an adjunct treatment to THA. We found that clinicians tended to use a management narrative suited to their preferred views on diagnostic eligibility, treatment selection, and relative treatment effectiveness. We also identified several facilitators and barriers for surgery and exercise, which mainly included patient age, pain management without analgesics, risk of adverse events, perception of improvement, diagnostic imaging, supervision, and habitualised exercise. Patients and clinicians indicated change in hip pain and hip function as the most important outcomes

1  
2  
3  
4 to evaluate the effectiveness of surgery or exercise. Based on these findings, we included  
5  
6 a parallel observational study investigating the generalizability, developed an enrolment  
7  
8 procedure using generic guidance and balanced narrative conveyed by an independent  
9  
10 clinician to facilitate communication of clinical equipoise, and adopted change in hip pain  
11  
12 and function as the primary outcome in the PROHIP trial protocol.<sup>28</sup>  
13  
14  
15  
16  
17

### 18 **Comparison with previous studies and interpretation of findings**

19  
20 In line with our findings, a recent qualitative study also found clear and high expectations  
21  
22 for surgery among Swedish patients with knee or hip OA.<sup>37</sup> However, several patients  
23  
24 reconsidered their treatment options and changed attitudes towards either accepting or  
25  
26 declining surgery after participation in a digital non-surgical program, emphasizing the  
27  
28 importance of providing sufficient information about management options to facilitate  
29  
30 shared-decision making.<sup>37</sup> Our findings also indicated that patients displayed  
31  
32 uncertainties about the potential benefits of exercise. This could be driven by  
33  
34 uncertainties and lack of knowledge about the effectiveness of exercise amongst  
35  
36 clinicians,<sup>38</sup> and due to less than 40% of the patients are recommended or referred to first-  
37  
38 line management.<sup>13</sup> Based on previous qualitative studies,<sup>39 40</sup> recovery expectations  
39  
40 among patients in this study were related to the criterion of resolution for surgery and  
41  
42 redefinition for exercise, which could indicate that patients accepting participation may  
43  
44 differ from those declining participation in our clinical trial in terms of recovery  
45  
46 expectations, hip pain, and functional status potentially reducing the generalizability of  
47  
48 the PROHIP trial.  
49  
50  
51  
52  
53

54 Our findings showed that clinicians tended to use a management narrative  
55  
56 suited to their preferred treatment. This strategy is in contrast to the information needs  
57  
58  
59  
60

1  
2  
3  
4 desired by patients with hip OA during clinical encounters,<sup>41</sup> and since clinicians have a  
5  
6 considerable influence on the attitudes and beliefs of patients this may result in  
7  
8 misconceptions and uninformed decisions.<sup>41 42</sup> This suggests that both orthopaedic  
9  
10 surgeons and physiotherapists could sway patient opinions about THA surgery and  
11  
12 exercise in either direction during enrolment procedures in the PROHIP trial by  
13  
14 highlighting the benefits of their preferred treatment option, whilst simultaneously  
15  
16 accentuating the limitations of the other treatment possibly leading to sampling bias.  
17  
18  
19

20 In consistency with previous studies,<sup>43-45</sup> clinicians in this study displayed  
21  
22 conflicting views on the indication criteria for THA. More interestingly, patients in this  
23  
24 study perceived findings or progression of hip OA on radiographic imaging to be the  
25  
26 primary determinant for THA, although there is low agreement between hip pain and  
27  
28 radiographic hip OA.<sup>46</sup> This may suggest that the patients still have an outdated ‘wear-  
29  
30 and-tear’ conception of hip OA that contradicts up-to-date insights on pathogenesis,  
31  
32 considering OA as a whole-joint disease.<sup>47</sup> This misconception of OA has previously been  
33  
34 shown to be facilitated by clinicians’ language and explanations,<sup>48</sup> which emphasize the  
35  
36 need of neutral and evidence based information during enrolment in the PROHIP trial.  
37  
38  
39

40 In line with the Osteoarthritis Research Society International  
41  
42 recommendations,<sup>49</sup> our findings highlighted change in hip pain and function as the most  
43  
44 important outcome. Several patient-reported outcome measures are available to evaluate  
45  
46 pain and functional status in patients with hip OA.<sup>49 50</sup> However, the OHS appears to have  
47  
48 the best validated clinometric properties,<sup>50</sup> indicating this as an appropriate primary  
49  
50 outcome measure.  
51  
52  
53  
54  
55  
56  
57  
58  
59  
60

## Limitations and strengths

Our study has limitations and strengths. A major limitation is that we conducted only one focus group interview for each of the groups with clinicians and decision makers due to time limitations. This may impact the certainty of achieving data saturation, and thus we may have missed important perspectives in these key stakeholder groups. Another limitation is that 3 out of 14 patients had previously undergone THA surgery, which may have influenced their perceptions, as previous surgery has been suggested to affect patient expectations.<sup>37</sup> Furthermore, all patients were scheduled for THA surgery prior to their participation in this study, which further could have primed them to be in favour of surgery. Strengths of our study comprise the variety in the sample of patients interviewed, including females and males of varying ages and different levels of hip pain and disability recruited from both a regional hospital and a university hospital. Additionally, we interviewed three key stakeholder groups involved in receiving and delivering treatment and making decisions about the management of hip OA to provide multiple perspectives and extend the scope of the findings. Lastly, an independent researcher conducted the data analysis to improve neutrality in the interpretation and development of themes and supporting codes due to clinical interests of conflict amongst the rest of the authors.

## CONCLUSION

Key stakeholders had treatment expectations and beliefs that could possibly affect enrolment procedures resulting in sampling bias and reduced generalizability of our clinical trial. Moreover, facilitators and barriers for surgery and exercise could influence retention rates and treatment crossovers in the trial. Therefore, we implemented three main strategies to improve methodological rigorousness of our trial protocol. Firstly, we



1  
2  
3  
4 added an observational study investigating the generalizability to address a potential low  
5 enrolment rate. Secondly, we developed an enrolment procedure using generic guidance  
6 and balanced narrative conveyed by an independent clinician to facilitate communication  
7 of clinical equipoise. Thirdly, we adopted change in hip pain and function as the primary  
8 outcome. These findings highlight the value of patient and public involvement in the  
9 development of trial protocols to reduce bias in comparative clinical trials evaluating  
10 surgical and non-surgical management.  
11  
12  
13  
14  
15  
16  
17  
18  
19  
20  
21  
22

### 23 **Acknowledgments**

24  
25 We would like to thank all of the participating patients, orthopaedic surgeons,  
26 physiotherapists, and decisions makers. Furthermore, we would like to acknowledge the  
27 orthopaedic surgeons from the Department of Orthopaedic Surgery, University Hospital  
28 of Southern Denmark, Vejle Hospital and Department of Orthopaedic Surgery and  
29 Traumatology, Odense University Hospital for their involvement in the recruitment of  
30 patients.  
31  
32  
33  
34  
35  
36  
37  
38  
39  
40  
41

### 42 **Authors' contributions**

43  
44 Conception and design: TF, IM, LRM, SO, KGI, and CM designed the study. Analysis  
45 and interpretation of the data: TF, KST, and CM. Drafting of the article: TF, KGI and  
46 CM. Critical revision of the article for important intellectual content: TF, KST, SO, IM,  
47 LRM, KGI, and CM. Final approval of the article: TF, KST, SO, IM, LRM, KGI, and  
48 CM. Obtaining of funding: TF and KGI. Collection and assembly of data: TF and KST.  
49  
50  
51  
52  
53  
54  
55  
56 Development of interview guides: TF.  
57  
58  
59  
60

## **Funding statement**

This work was supported by The Danish Rheumatism Association (R166-5553). The funders were not involved in designing the study, data collection, data management, data analysis, interpretation of the results, writing the article, or in the decision to submit the article for publication.

## **Competing interest**

No competing interest.

## **Ethical Approval**

This study was approved by The Danish Data Protection Agency (Journal No 18/23994), while no ethical approval was required according to the Danish Act on Research Ethics.

## **Data availability statement**

Data are available upon reasonable request. Data comprise digital voice recordings of each focus group interview, verbatim transcriptions in Word files, and participant-reported questionnaire responses in PDF files. These data are stored in a password-protected hospital server only accessible to the researchers. Digital audio recordings and individual participant-reported questionnaire responses contain identifiable data and will not be made available on request to maintain participant anonymity. Transcriptions of each focus group interview and the participant characteristics data-set with de-identified participant data may be made available upon reasonable request.

## REFERENCES

1. Cross M, Smith E, Hoy D, et al. The global burden of hip and knee osteoarthritis: estimates from the global burden of disease 2010 study. *Ann Rheum Dis* 2014;73(7):1323-30. doi: 10.1136/annrheumdis-2013-204763 [published Online First: 2014/02/21]
2. Pereira D, Peleteiro B, Araujo J, et al. The effect of osteoarthritis definition on prevalence and incidence estimates: a systematic review. *Osteoarthritis Cartilage* 2011;19(11):1270-85. doi: 10.1016/j.joca.2011.08.009 [published Online First: 2011/09/13]
3. Ferguson RJ, Palmer AJ, Taylor A, et al. Hip replacement. *Lancet* 2018;392(10158):1662-71. doi: 10.1016/s0140-6736(18)31777-x [published Online First: 2018/11/30]
4. Rosenlund S, Broeng L, Holsgaard-Larsen A, et al. Patient-reported outcome after total hip arthroplasty: comparison between lateral and posterior approach. *Acta Orthop* 2017;88(3):239-47. doi: 10.1080/17453674.2017.1291100 [published Online First: 2017/05/04]
5. Shan L, Shan B, Graham D, et al. Total hip replacement: a systematic review and meta-analysis on mid-term quality of life. *Osteoarthritis Cartilage* 2014;22(3):389-406. doi: 10.1016/j.joca.2013.12.006 [published Online First: 2014/01/07]
6. Beswick AD, Wylde V, Gooberman-Hill R, et al. What proportion of patients report long-term pain after total hip or knee replacement for osteoarthritis? A systematic review of prospective studies in unselected patients. *BMJ Open*

- 2012;2(1):e000435. doi: 10.1136/bmjopen-2011-000435 [published Online First: 2012/02/24]
7. Bannuru RR, Osani MC, Vaysbrot EE, et al. OARSI guidelines for the non-surgical management of knee, hip, and polyarticular osteoarthritis. *Osteoarthritis Cartilage* 2019;27(11):1578-89. doi: 10.1016/j.joca.2019.06.011 [published Online First: 2019/07/07]
8. van Doormaal MCM, Meerhoff GA, Vliet Vlieland TPM, et al. A clinical practice guideline for physical therapy in patients with hip or knee osteoarthritis. *Musculoskeletal Care* 2020 doi: 10.1002/msc.1492 [published Online First: 2020/07/10]
9. Goh SL, Persson MSM, Stocks J, et al. Relative Efficacy of Different Exercises for Pain, Function, Performance and Quality of Life in Knee and Hip Osteoarthritis: Systematic Review and Network Meta-Analysis. *Sports Med* 2019;49(5):743-61. doi: 10.1007/s40279-019-01082-0 [published Online First: 2019/03/05]
10. Hansen S, Mikkelsen LR, Overgaard S, et al. Effectiveness of supervised resistance training for patients with hip osteoarthritis - a systematic review. *Dan Med J* 2020;67(6) [published Online First: 2020/08/04]
11. Dell'Isola A, Jönsson T, Rolfson O, et al. Willingness to Undergo Joint Surgery Following a First-Line Intervention for Osteoarthritis: Data From the Better Management of People With Osteoarthritis Register. *Arthritis Care Res (Hoboken)* 2021;73(6):818-27. doi: 10.1002/acr.24486 [published Online First: 2020/10/15]

- 1  
2  
3  
4  
5  
6  
7  
8  
9  
10  
11  
12  
13  
14  
15  
16  
17  
18  
19  
20  
21  
22  
23  
24  
25  
26  
27  
28  
29  
30  
31  
32  
33  
34  
35  
36  
37  
38  
39  
40  
41  
42  
43  
44  
45  
46  
47  
48  
49  
50  
51  
52  
53  
54  
55  
56  
57  
58  
59  
60
12. Svege I, Nordsletten L, Fernandes L, et al. Exercise therapy may postpone total hip replacement surgery in patients with hip osteoarthritis: a long-term follow-up of a randomised trial. *Ann Rheum Dis* 2015;74(1):164-9. doi: 10.1136/annrheumdis-2013-203628 [published Online First: 2013/11/21]
  13. Hagen KB, Smedslund G, Østerås N, et al. Quality of Community-Based Osteoarthritis Care: A Systematic Review and Meta-Analysis. *Arthritis Care Res (Hoboken)* 2016;68(10):1443-52. doi: 10.1002/acr.22891 [published Online First: 2016/03/19]
  14. Zhang W, Moskowitz RW, Nuki G, et al. OARSI recommendations for the management of hip and knee osteoarthritis, Part II: OARSI evidence-based, expert consensus guidelines. *Osteoarthritis Cartilage* 2008;16(2):137-62. doi: 10.1016/j.joca.2007.12.013 [published Online First: 2008/02/19]
  15. Skou ST, Poulsen E, Bricca A, et al. Benefits and Harms of Interventions With Surgery Compared to Interventions Without Surgery for Musculoskeletal Conditions: A Systematic Review With Meta-analysis. *J Orthop Sports Phys Ther* 2022;52(6):312-44. doi: 10.2519/jospt.2022.11075 [published Online First: 2022/06/02]
  16. Ross S, Grant A, Counsell C, et al. Barriers to participation in randomised controlled trials: a systematic review. *J Clin Epidemiol* 1999;52(12):1143-56. doi: 10.1016/s0895-4356(99)00141-9 [published Online First: 1999/12/02]
  17. Frobell RB, Roos EM, Roos HP, et al. A randomized trial of treatment for acute anterior cruciate ligament tears. *N Engl J Med* 2010;363(4):331-42. doi: 10.1056/NEJMoa0907797 [published Online First: 2010/07/28]

- 1  
2  
3  
4 18. Skou ST, Roos EM, Laursen MB, et al. A Randomized, Controlled Trial of Total  
5  
6 Knee Replacement. *N Engl J Med* 2015;373(17):1597-606. doi:  
7  
8 10.1056/NEJMoa1505467  
9  
10  
11 19. van de Graaf VA, Noorduyn JCA, Willigenburg NW, et al. Effect of Early Surgery  
12  
13 vs Physical Therapy on Knee Function Among Patients With Nonobstructive  
14  
15 Meniscal Tears: The ESCAPE Randomized Clinical Trial. *Jama*  
16  
17 2018;320(13):1328-37. doi: 10.1001/jama.2018.13308 [published Online First:  
18  
19 2018/10/05]  
20  
21  
22  
23 20. Weinstein JN, Tosteson TD, Lurie JD, et al. Surgical vs nonoperative treatment for  
24  
25 lumbar disk herniation: the Spine Patient Outcomes Research Trial (SPORT): a  
26  
27 randomized trial. *Jama* 2006;296(20):2441-50. doi: 10.1001/jama.296.20.2441  
28  
29 [published Online First: 2006/11/23]  
30  
31  
32  
33 21. Skou ST, Hölmich P, Lind M, et al. Early Surgery or Exercise and Education for  
34  
35 Meniscal Tears in Young Adults. *NEJM Evidence* 2022;1(2) doi:  
36  
37 10.1056/EVIDoa2100038  
38  
39  
40 22. Al-Shahi Salman R, Beller E, Kagan J, et al. Increasing value and reducing waste in  
41  
42 biomedical research regulation and management. *Lancet* 2014;383(9912):176-  
43  
44 85. doi: 10.1016/s0140-6736(13)62297-7 [published Online First: 2014/01/15]  
45  
46  
47  
48 23. Crocker JC, Pratt-Boyden K, Hislop J, et al. Patient and public involvement (PPI) in  
49  
50 UK surgical trials: a survey and focus groups with stakeholders to identify  
51  
52 practices, views, and experiences. *Trials* 2019;20(1):119. doi: 10.1186/s13063-  
53  
54 019-3183-0 [published Online First: 2019/02/13]  
55  
56  
57  
58  
59  
60

- 1  
2  
3  
4 24. Crocker JC, Ricci-Cabello I, Parker A, et al. Impact of patient and public  
5  
6 involvement on enrolment and retention in clinical trials: systematic review and  
7  
8 meta-analysis. *Bmj* 2018;363:k4738. doi: 10.1136/bmj.k4738 [published Online  
9  
10 First: 2018/11/30]  
11  
12  
13  
14 25. Owyang D, Bakhsh A, Brewer D, et al. Patient and Public Involvement Within  
15  
16 Orthopaedic Research: A Systematic Review. *J Bone Joint Surg Am*  
17  
18 2021;103(13):e51. doi: 10.2106/jbjs.20.01573 [published Online First:  
19  
20 2021/07/07]  
21  
22  
23  
24 26. Adom D, Yeboah A, Ankrah A. Constructivism philosophical paradigm: implication  
25  
26 for research, teaching and learning. *GJAHSS* 2016;4:1-9.  
27  
28  
29 27. Tong A, Sainsbury P, Craig J. Consolidated criteria for reporting qualitative  
30  
31 research (COREQ): a 32-item checklist for interviews and focus groups. *Int J*  
32  
33 *Qual Health Care* 2007;19(6):349-57. doi: 10.1093/intqhc/mzm042 [published  
34  
35 Online First: 2007/09/18]  
36  
37  
38  
39 28. Frydendal T, Christensen R, Mechlenburg I, et al. Total hip arthroplasty versus  
40  
41 progressive resistance training in patients with severe hip osteoarthritis: protocol  
42  
43 for a multicentre, parallel-group, randomised controlled superiority trial. *BMJ*  
44  
45 *Open* 2021;11(10):e051392. doi: 10.1136/bmjopen-2021-051392 [published  
46  
47 Online First: 2021/10/24]  
48  
49  
50  
51 29. Shimmin C. Methods of patient and public engagement: A guide: George and Faye  
52  
53 Yee- Center of Healthcare Innovation; 2020 [Available from:  
54  
55 <https://static1.squarespace.com/static/5e57d5337fe0d104c77cca10/t/5ed808e613>  
56  
57  
58  
59  
60

1  
2  
3  
4 [338b69dcb8f6df/1591216360358/20.05.20+PE+methods+of+Engagement+web.pdf](https://doi.org/10.1136/bmjopen-2020-025559)  
5  
6  
7 [pdf](#) accessed 24 July 2020.  
8

- 9  
10 30. Lambert SD, Loiselle CG. Combining individual interviews and focus groups to  
11 enhance data richness. *Journal of Advanced Nursing* 2008;62(2):228-37. doi:  
12 10.1111/j.1365-2648.2007.04559.x  
13  
14  
15  
16 31. Krueger RA, Casey MA. Designing and conducting focus group interviews: St Paul,  
17 Minnesota, USA, 2002.  
18  
19  
20  
21 32. Paulsen A, Odgaard A, Overgaard S. Translation, cross-cultural adaptation and  
22 validation of the Danish version of the Oxford hip score: Assessed against  
23 generic and disease-specific questionnaires. *Bone Joint Res* 2012;1(9):225-33.  
24 doi: 10.1302/2046-3758.19.2000076 [published Online First: 2013/04/24]  
25  
26  
27  
28  
29 33. Nilsson AK, Lohmander LS, Klassbo M, et al. Hip disability and osteoarthritis  
30 outcome score (HOOS)--validity and responsiveness in total hip replacement.  
31 *BMC Musculoskelet Disord* 2003;4:10. doi: 10.1186/1471-2474-4-10 [published  
32 Online First: 2003/06/05]  
33  
34  
35  
36 34. Braun V, Clarke V. Thematic analysis : a practical guide. Los Angeles: SAGE 2022.  
37  
38  
39  
40 35. Attride-Stirling J. Thematic networks: an analytic tool for qualitative research.  
41 *Qualitative Research* 2001;1(3):385-405. doi: 10.1177/146879410100100307  
42  
43  
44  
45 36. Polit DF, Beck CT. Nursing Research: Principles and Methods: Lippincott Williams  
46 & Wilkins 2004.  
47  
48  
49  
50 37. Cronström A, Dahlberg LE, Nero H, et al. "I was considering surgery because I  
51 believed that was how it was treated": a qualitative study on willingness for joint  
52 surgery after completion of a digital management program for osteoarthritis.  
53  
54  
55  
56  
57  
58  
59  
60



- 1  
2  
3  
4 *Osteoarthritis Cartilage* 2019;27(7):1026-32. doi: 10.1016/j.joca.2019.04.004  
5  
6 [published Online First: 2019/04/20]  
7  
8  
9  
10 38. Nissen N, Holm PM, Bricca A, et al. Clinicians' beliefs and attitudes to physical  
11 activity and exercise therapy as treatment for knee and/or hip osteoarthritis: a  
12 scoping review. *Osteoarthritis Cartilage* 2022;30(2):260-69. doi:  
13 10.1016/j.joca.2021.11.008 [published Online First: 2021/11/21]  
14  
15  
16  
17  
18 39. Beaton DE, Tarasuk V, Katz JN, et al. "Are you better?" A qualitative study of the  
19 meaning of recovery. *Arthritis Rheum* 2001;45(3):270-9. doi: 10.1002/1529-  
20 0131(200106)45:3<270::Aid-art260>3.0.Co;2-t [published Online First:  
21 2001/06/21]  
22  
23  
24  
25  
26  
27  
28 40. Myburgh C, Boyle E, Lauridsen HH, et al. What influences retrospective self-  
29 appraised recovery status among Danes with low-back problems? A comparative  
30 qualitative investigation. *J Rehabil Med* 2015;47(8):741-7. doi:  
31 10.2340/16501977-1987 [published Online First: 2015/07/02]  
32  
33  
34  
35  
36  
37  
38 41. Brembo EA, Kapstad H, Eide T, et al. Patient information and emotional needs  
39 across the hip osteoarthritis continuum: a qualitative study. *BMC Health Serv*  
40 *Res* 2016;16:88. doi: 10.1186/s12913-016-1342-5 [published Online First:  
41 2016/03/13]  
42  
43  
44  
45  
46  
47  
48 42. Darlow B, Dowell A, Baxter GD, et al. The enduring impact of what clinicians say  
49 to people with low back pain. *Ann Fam Med* 2013;11(6):527-34. doi:  
50 10.1370/afm.1518 [published Online First: 2013/11/13]  
51  
52  
53  
54  
55 43. Ackerman IN, Dieppe PA, March LM, et al. Variation in age and physical status  
56 prior to total knee and hip replacement surgery: a comparison of centers in  
57  
58  
59  
60

- 1  
2  
3  
4 Australia and Europe. *Arthritis Rheum* 2009;61(2):166-73. doi:  
5  
6 10.1002/art.24215 [published Online First: 2009/01/30]  
7  
8  
9  
10 44. Cobos R, Latorre A, Aizpuru F, et al. Variability of indication criteria in knee and  
11  
12 hip replacement: an observational study. *BMC Musculoskelet Disord*  
13  
14 2010;11:249. doi: 10.1186/1471-2474-11-249 [published Online First:  
15  
16 2010/10/28]  
17  
18  
19 45. Dreinhöfer KE, Dieppe P, Stürmer T, et al. Indications for total hip replacement:  
20  
21 comparison of assessments of orthopaedic surgeons and referring physicians.  
22  
23 *Ann Rheum Dis* 2006;65(10):1346-50. doi: 10.1136/ard.2005.047811 [published  
24  
25 Online First: 2006/01/28]  
26  
27  
28  
29 46. Kim C, Nevitt MC, Niu J, et al. Association of hip pain with radiographic evidence  
30  
31 of hip osteoarthritis: diagnostic test study. *BMJ* 2015;351:h5983. doi:  
32  
33 10.1136/bmj.h5983 [published Online First: 2015/12/04]  
34  
35  
36  
37 47. Hunter DJ, Bierma-Zeinstra S. Osteoarthritis. *The Lancet* 2019;393(10182):1745-  
38  
39 59. doi: 10.1016/s0140-6736(19)30417-9  
40  
41  
42 48. Darlow B, Brown M, Thompson B, et al. Living with osteoarthritis is a balancing  
43  
44 act: an exploration of patients' beliefs about knee pain. *BMC Rheumatol*  
45  
46 2018;2:15. doi: 10.1186/s41927-018-0023-x [published Online First:  
47  
48 2019/03/20]  
49  
50  
51 49. Lane NE, Hochberg MC, Nevitt MC, et al. OARSI Clinical Trials  
52  
53 Recommendations: Design and conduct of clinical trials for hip osteoarthritis.  
54  
55 *Osteoarthritis Cartilage* 2015;23(5):761-71. doi: 10.1016/j.joca.2015.03.006  
56  
57 [published Online First: 2015/05/09]  
58  
59  
60

- 1  
2  
3  
4 50. Harris K, Dawson J, Gibbons E, et al. Systematic review of measurement properties  
5  
6 of patient-reported outcome measures used in patients undergoing hip and knee  
7  
8 arthroplasty. *Patient Relat Outcome Meas* 2016;7:101-8. doi:  
9  
10 10.2147/prom.S97774 [published Online First: 2016/08/16]  
11  
12  
13  
14  
15  
16  
17  
18  
19  
20  
21  
22  
23  
24  
25  
26  
27  
28  
29  
30  
31  
32  
33  
34  
35  
36  
37  
38  
39  
40  
41  
42  
43  
44  
45  
46  
47  
48  
49  
50  
51  
52  
53  
54  
55  
56  
57  
58  
59  
60

For peer review only

## FIGURE LEGENDS

**Figure 1.** Eligibility criteria for each key stakeholder group: Patients, Clinicians and Decision makers.

**Figure 2.** Main themes and supporting codes identified in focus groups with patients with hip osteoarthritis considered eligible for total hip arthroplasty, clinicians (orthopaedic surgeons and physiotherapists) from orthopaedic and physiotherapy departments, and decision makers from a political party or non-governmental organisation.

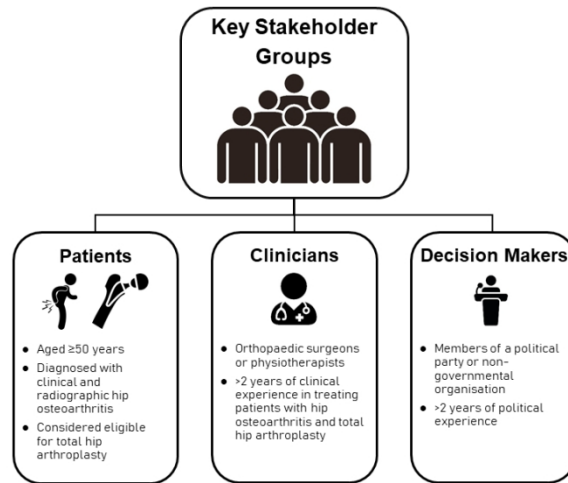

25 Figure 1. Eligibility criteria for each key stakeholder group: Patients, Clinicians and Decision makers.

26 338x190mm (96 x 96 DPI)

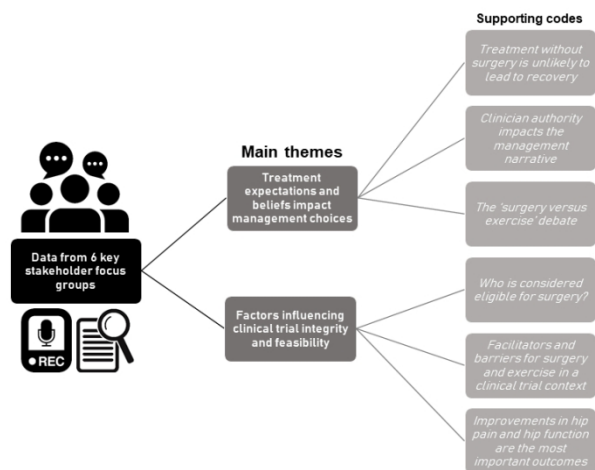

Figure 2. Main themes and supporting codes identified in focus groups with patients with hip osteoarthritis considered eligible for total hip arthroplasty, clinicians (orthopaedic surgeons and physiotherapists) from orthopaedic and physiotherapy departments, and decision makers from a political party or non-governmental organisation.

338x190mm (96 x 96 DPI)

## Online Supplementary File 1A. Interview guide for the patient group

| Topic                                          | Main question                                                                    | Supplementary probing questions                                                                                                                                                                                                                                                                                                                                                                                                                                                                                                                                                                                                                                                                                                    |
|------------------------------------------------|----------------------------------------------------------------------------------|------------------------------------------------------------------------------------------------------------------------------------------------------------------------------------------------------------------------------------------------------------------------------------------------------------------------------------------------------------------------------------------------------------------------------------------------------------------------------------------------------------------------------------------------------------------------------------------------------------------------------------------------------------------------------------------------------------------------------------|
| Treatment for hip osteoarthritis (THA surgery) | What do you think about surgery as treatment for hip osteoarthritis?             | <ol style="list-style-type: none"> <li>1. When and why did you start considering surgery as a treatment option?</li> <li>2. How was the decision of surgery taken?</li> <li>3. When do you know when you are ready for surgery? (physically and mentally)</li> <li>4. How do you think the information was about the surgery, including risks and other treatments?</li> <li>5. What expectations do you have for the surgery?</li> <li>6. What do you consider to be the advantages of surgery?</li> <li>7. What do you consider to be the disadvantages of surgery?</li> <li>8. What is the main reason/motivation to undergo surgery? (or declining surgery)</li> </ol>                                                         |
| Treatment for hip osteoarthritis (exercise)    | What do you think about exercise as treatment for hip osteoarthritis?            | <ol style="list-style-type: none"> <li>9. What treatments have you otherwise tried before surgery? (type, systematics and durations)</li> <li>10. How have your experiences been with exercise? (type, systematic, duration and effect)</li> <li>11. How have your experiences been with other treatments? (effect)</li> <li>12. What do you consider to be the advantages of exercise?</li> <li>13. What do you consider to be the disadvantages of exercise?</li> </ol>                                                                                                                                                                                                                                                          |
| Participation in a clinical trial              | <p>CASE DESCRIPTION</p> <p>(Detailed information about the PROHIP trial)</p>     | <ol style="list-style-type: none"> <li>14. What do you think about participating in a trial where you are randomly being assigned to surgery (total hip arthroplasty) or exercise (with the option of later surgery if needed)?</li> <li>15. What do you consider to be of importance to whether you would participate in the trial?</li> <li>16. What would affect your considerations about participating in the trial?</li> </ol>                                                                                                                                                                                                                                                                                               |
| Patient material and information               | How would you prefer to receive information about this trial?                    | <ol style="list-style-type: none"> <li>17. When do you think, it is best to present the information about the trial for potential participants?</li> <li>18. What do you think the patient information should contain?</li> </ol>                                                                                                                                                                                                                                                                                                                                                                                                                                                                                                  |
| Exercise protocol                              | If you were to participate in 12-weeks of exercise, how do think this should be? | <ol style="list-style-type: none"> <li>19. What do you think about resistance training in machines?</li> <li>20. What significance do the physical frames have for you? (location, duration, and environment) <ul style="list-style-type: none"> <li>• How many times a week is it possible for you to exercise?</li> <li>• How long would you spend on one training session?</li> </ul> </li> <li>21. What significance does it have for you, if you have to drive for the training sessions?</li> <li>22. What significance does it have for you whether a physiotherapist supervises the training sessions?</li> <li>23. How do you think you can continue to exercise on your own after a 12-week training program?</li> </ol> |

---

|    |          |                                                                |
|----|----------|----------------------------------------------------------------|
| 1  |          |                                                                |
| 2  | Outcomes | 24. What else do you think is important to measure upon?       |
| 3  |          |                                                                |
| 4  |          | 25. What is your main problem right now (due to hip            |
| 5  |          | osteoarthritis)?                                               |
| 6  |          | 26. How would you describe whether a surgery has been          |
| 7  |          | successful?                                                    |
| 8  |          | 27. How would you describe whether an exercise program has     |
| 9  |          | been successful?                                               |
| 10 |          |                                                                |
| 11 |          | 28. What do you think about the questionnaires you filled out? |
| 12 |          | (Relevance, number of items, etc.)                             |
| 13 |          |                                                                |

---

For peer review only



## Online Supplementary File 1B. Interview guide for the clinician group

| Topic                                       | Main question                                                                                                | Supplementary probing questions                                                                                                                                                                                                                                                                                                                                                                                                                                                                                                                                                                                                                                                                                                                                                                                                                                                                                                                                                  |
|---------------------------------------------|--------------------------------------------------------------------------------------------------------------|----------------------------------------------------------------------------------------------------------------------------------------------------------------------------------------------------------------------------------------------------------------------------------------------------------------------------------------------------------------------------------------------------------------------------------------------------------------------------------------------------------------------------------------------------------------------------------------------------------------------------------------------------------------------------------------------------------------------------------------------------------------------------------------------------------------------------------------------------------------------------------------------------------------------------------------------------------------------------------|
| Treatment for hip osteoarthritis (surgery)  | What do you think about surgery as treatment for hip osteoarthritis?                                         | <ol style="list-style-type: none"> <li>1. How do you experience the patients' perception of surgery (THA) as treatment for hip osteoarthritis?</li> <li>2. What do you experience patients with hip osteoarthritis indicate as main reason/motivation to undergo surgery?</li> <li>3. What do you consider to be the advantages of surgery?</li> <li>4. What do you consider to be the disadvantages of surgery?</li> <li>5. When do you think a patient with hip osteoarthritis is eligible for a THA?</li> </ol>                                                                                                                                                                                                                                                                                                                                                                                                                                                               |
| Treatment for hip osteoarthritis (exercise) | What do you think about exercise as treatment for hip osteoarthritis?                                        | <ol style="list-style-type: none"> <li>6. How do you experience the patients' perception of exercise as treatment for hip osteoarthritis?</li> <li>7. What do you experience patients with hip osteoarthritis indicate as main reason/motivation in choosing exercise rather than surgery?</li> <li>8. What do you consider to be the advantages of exercise?</li> <li>9. What do you consider to be the disadvantages of exercise?</li> <li>10. When do you think a patient with hip osteoarthritis should try exercise instead of getting a THA?</li> <li>11. How do you interpret the results of this trial?<sup>20</sup></li> <li>12. How have you experienced the debate on surgery (total knee arthroplasty) and exercise?</li> <li>11. How do you think this debate affects the patients?</li> <li>12. What do you consider to be the advantages of this debate?</li> <li>13. What do you consider to be disadvantages of this debate?</li> </ol>                         |
| Participation in a clinical trial           | <p>CASE DESCRIPTION</p> <p>(Detailed information about the PROHIP trial)</p>                                 | <ol style="list-style-type: none"> <li>14. What is your perception of a trial, in which patients are randomly assigned to surgery (THA) or exercise (with the option of later surgery if needed)?</li> <li>15. What challenges do you consider there are in recruiting for a trial, in which patients are randomized to THA or resistance training?</li> <li>16. How do you think it is ensured that clinician (e.g. orthopedic surgeons, physiotherapists, and nurses) do not color the patients' decision to participate?</li> <li>17. How are orthopedic surgeons and physiotherapists motivated to participate in the trial?</li> <li>18. How is collaboration between surgeons and physiotherapists in relation to the project created?</li> <li>19. How would you conduct the screening and recruitment procedure in this trial?</li> <li>20. What do you consider as of importance for whether patients with hip osteoarthritis will participate in the study?</li> </ol> |
| Patient material and information            | How do you think the patient information regarding the trial should be presented for potential participants? | <ol style="list-style-type: none"> <li>21. When do you think, it is best to present the information about the trial for potential participants?</li> </ol>                                                                                                                                                                                                                                                                                                                                                                                                                                                                                                                                                                                                                                                                                                                                                                                                                       |

|    |                   |                                                                                                                                                                  |
|----|-------------------|------------------------------------------------------------------------------------------------------------------------------------------------------------------|
| 1  |                   |                                                                                                                                                                  |
| 2  | Exercise protocol | How do you think the exercise intervention should be conducted in the trial?                                                                                     |
| 3  |                   | 22. What exercises do you think are relevant to include in the exercise program?                                                                                 |
| 4  |                   | 23. How long do you think one training session should last?                                                                                                      |
| 5  |                   | 24. How do you think we will get the patients to continue to exercise after the 12-week intervention period?                                                     |
| 6  |                   |                                                                                                                                                                  |
| 7  |                   |                                                                                                                                                                  |
| 8  | Outcomes          | Which outcome do you consider to be the primary to measure in patients with hip osteoarthritis?                                                                  |
| 9  |                   | 25. Which secondary outcomes do you consider to be important to measure in patients with hip osteoarthritis?                                                     |
| 10 |                   | 26. What do you experience patients with hip osteoarthritis indicate as being the primary problem (symptoms/limitations) that is of importance to the treatment? |
| 11 |                   | 27. How would you describe whether surgery (THA) has been successful?                                                                                            |
| 12 |                   | 28. How would you describe whether exercise has been successful?                                                                                                 |
| 13 |                   |                                                                                                                                                                  |
| 14 |                   |                                                                                                                                                                  |
| 15 |                   |                                                                                                                                                                  |
| 16 |                   |                                                                                                                                                                  |
| 17 |                   |                                                                                                                                                                  |
| 18 |                   |                                                                                                                                                                  |
| 19 |                   |                                                                                                                                                                  |
| 20 |                   |                                                                                                                                                                  |
| 21 |                   |                                                                                                                                                                  |
| 22 |                   |                                                                                                                                                                  |
| 23 |                   |                                                                                                                                                                  |
| 24 |                   |                                                                                                                                                                  |
| 25 |                   |                                                                                                                                                                  |
| 26 |                   |                                                                                                                                                                  |
| 27 |                   |                                                                                                                                                                  |
| 28 |                   |                                                                                                                                                                  |
| 29 |                   |                                                                                                                                                                  |
| 30 |                   |                                                                                                                                                                  |
| 31 |                   |                                                                                                                                                                  |
| 32 |                   |                                                                                                                                                                  |
| 33 |                   |                                                                                                                                                                  |
| 34 |                   |                                                                                                                                                                  |
| 35 |                   |                                                                                                                                                                  |
| 36 |                   |                                                                                                                                                                  |
| 37 |                   |                                                                                                                                                                  |
| 38 |                   |                                                                                                                                                                  |
| 39 |                   |                                                                                                                                                                  |
| 40 |                   |                                                                                                                                                                  |
| 41 |                   |                                                                                                                                                                  |
| 42 |                   |                                                                                                                                                                  |
| 43 |                   |                                                                                                                                                                  |
| 44 |                   |                                                                                                                                                                  |
| 45 |                   |                                                                                                                                                                  |
| 46 |                   |                                                                                                                                                                  |
| 47 |                   |                                                                                                                                                                  |
| 48 |                   |                                                                                                                                                                  |
| 49 |                   |                                                                                                                                                                  |
| 50 |                   |                                                                                                                                                                  |
| 51 |                   |                                                                                                                                                                  |
| 52 |                   |                                                                                                                                                                  |
| 53 |                   |                                                                                                                                                                  |
| 54 |                   |                                                                                                                                                                  |
| 55 |                   |                                                                                                                                                                  |
| 56 |                   |                                                                                                                                                                  |
| 57 |                   |                                                                                                                                                                  |
| 58 |                   |                                                                                                                                                                  |
| 59 |                   |                                                                                                                                                                  |
| 60 |                   |                                                                                                                                                                  |

For peer review only

## Online Supplementary File 1C. Interview guide for the decision maker group

| Topic                                       | Main question                                                                                                                  | Supplementary probing questions                                                                                                                                                                                                                                                                                                                                                                                                                                                                                                                                                                                                                                                           |
|---------------------------------------------|--------------------------------------------------------------------------------------------------------------------------------|-------------------------------------------------------------------------------------------------------------------------------------------------------------------------------------------------------------------------------------------------------------------------------------------------------------------------------------------------------------------------------------------------------------------------------------------------------------------------------------------------------------------------------------------------------------------------------------------------------------------------------------------------------------------------------------------|
| Treatment for hip osteoarthritis (surgery)  | What do you think about surgery as treatment for hip osteoarthritis?                                                           | <ol style="list-style-type: none"> <li>1. How do you experience the patients' perception of surgery (THA) as treatment for hip osteoarthritis?</li> <li>2. What do you consider to be the advantages of surgery?</li> <li>3. What do you consider to be the disadvantages of surgery?</li> </ol>                                                                                                                                                                                                                                                                                                                                                                                          |
| Treatment for hip osteoarthritis (exercise) | What do you think about exercise as treatment for hip osteoarthritis?                                                          | <ol style="list-style-type: none"> <li>4. How do you experience the patients' perception of exercise as treatment for hip osteoarthritis?</li> <li>5. What do you consider to be the advantages of exercise?</li> <li>6. What do you consider to be the disadvantages of exercise?</li> <li>7. How do you interpret the results of this trial?<sup>20</sup></li> <li>8. How do you think we can avoid this trial to encounter similar diverse attitudes from the "media"/colleagues?</li> <li>9. How have you experienced the debate on surgery and exercise?</li> </ol>                                                                                                                  |
| Participation in a clinical trial           | <p>CASE DESCRIPTION</p> <p>(Detailed information about the PROHIP trial)</p>                                                   | <ol style="list-style-type: none"> <li>10. What is your perception of a trial, in which patients are randomly assigned to surgery (THA) or exercise (with the option of later surgery if needed)?</li> <li>11. What challenges do you consider there are in recruiting for a trial, in which patients are randomized to THA or resistance training?</li> <li>12. In case, the effect of resistance training is lower than surgery (THA), but withholds patients from undergoing surgery because the patients consider the non-surgical treatment as successful - how would you interpret the results?</li> <li>13. What ethical considerations do you think are in this trial?</li> </ol> |
| Patient material and information            | What do you think the patient information should contain?                                                                      | <ol style="list-style-type: none"> <li>14. How would you prefer to receive information about this trial? (Content and method)</li> <li>15. When do you think, it is best to present the information about the trial for potential participants?</li> </ol>                                                                                                                                                                                                                                                                                                                                                                                                                                |
| Implementation of findings                  | Which barriers and facilitators, do you think, affect the implementation of the results from the trial into clinical practice? | <ol style="list-style-type: none"> <li>16. What consequences do you think the trial may have politically in relation to the treatment of patients with hip osteoarthritis?</li> <li>17. What consequences do you think the trial may have on clinical practice?</li> <li>18. What challenges do you think there may be in implementing the results from the trial into clinical practice?</li> <li>19. Which factors do you think will be decisive for a successful implementation of the results from the trial into clinical practice?</li> <li>20. How do you think that we may optimize the implementation of the results from the trial into clinical practice?</li> </ol>           |

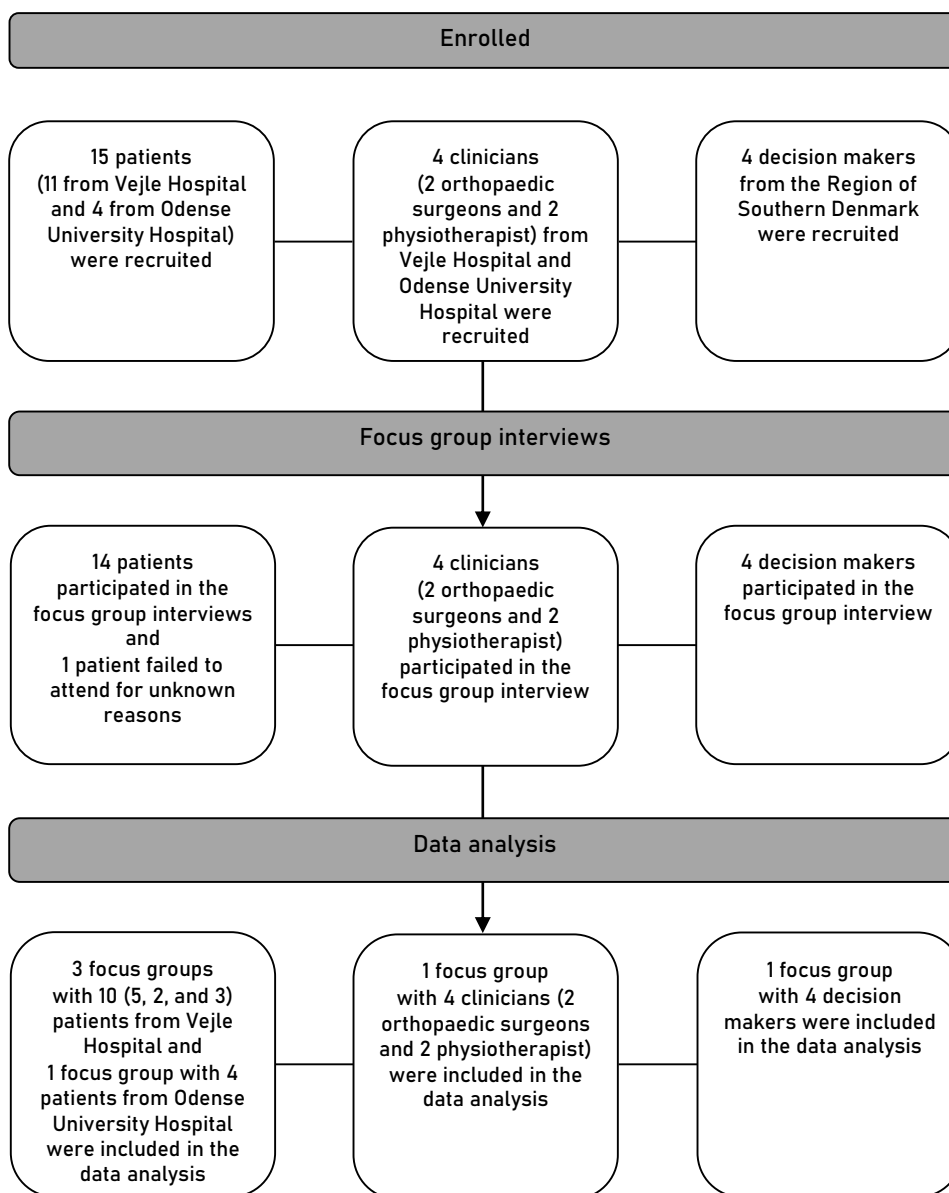

**Online Supplementary File 2.** Flowchart of key stakeholder participants in the study.

## COREQ (COnsolidated criteria for REporting Qualitative research) Checklist

A checklist of items that should be included in reports of qualitative research. You must report the page number in your manuscript where you consider each of the items listed in this checklist. If you have not included this information, either revise your manuscript accordingly before submitting or note N/A.

| Topic                                          | Item No. | Guide Questions/Description                                                                                                                              | Reported on Page No. |
|------------------------------------------------|----------|----------------------------------------------------------------------------------------------------------------------------------------------------------|----------------------|
| <b>Domain 1: Research team and reflexivity</b> |          |                                                                                                                                                          |                      |
| <i>Personal characteristics</i>                |          |                                                                                                                                                          |                      |
| Interviewer/facilitator                        | 1        | Which author/s conducted the interview or focus group?                                                                                                   |                      |
| Credentials                                    | 2        | What were the researcher's credentials? E.g. PhD, MD                                                                                                     |                      |
| Occupation                                     | 3        | What was their occupation at the time of the study?                                                                                                      |                      |
| Gender                                         | 4        | Was the researcher male or female?                                                                                                                       |                      |
| Experience and training                        | 5        | What experience or training did the researcher have?                                                                                                     |                      |
| <i>Relationship with participants</i>          |          |                                                                                                                                                          |                      |
| Relationship established                       | 6        | Was a relationship established prior to study commencement?                                                                                              |                      |
| Participant knowledge of the interviewer       | 7        | What did the participants know about the researcher? e.g. personal goals, reasons for doing the research                                                 |                      |
| Interviewer characteristics                    | 8        | What characteristics were reported about the interviewer/facilitator? e.g. Bias, assumptions, reasons and interests in the research topic                |                      |
| <b>Domain 2: Study design</b>                  |          |                                                                                                                                                          |                      |
| <i>Theoretical framework</i>                   |          |                                                                                                                                                          |                      |
| Methodological orientation and Theory          | 9        | What methodological orientation was stated to underpin the study? e.g. grounded theory, discourse analysis, ethnography, phenomenology, content analysis |                      |
| <i>Participant selection</i>                   |          |                                                                                                                                                          |                      |
| Sampling                                       | 10       | How were participants selected? e.g. purposive, convenience, consecutive, snowball                                                                       |                      |
| Method of approach                             | 11       | How were participants approached? e.g. face-to-face, telephone, mail, email                                                                              |                      |
| Sample size                                    | 12       | How many participants were in the study?                                                                                                                 |                      |
| Non-participation                              | 13       | How many people refused to participate or dropped out? Reasons?                                                                                          |                      |
| <i>Setting</i>                                 |          |                                                                                                                                                          |                      |
| Setting of data collection                     | 14       | Where was the data collected? e.g. home, clinic, workplace                                                                                               |                      |
| Presence of non-participants                   | 15       | Was anyone else present besides the participants and researchers?                                                                                        |                      |
| Description of sample                          | 16       | What are the important characteristics of the sample? e.g. demographic data, date                                                                        |                      |
| <i>Data collection</i>                         |          |                                                                                                                                                          |                      |
| Interview guide                                | 17       | Were questions, prompts, guides provided by the authors? Was it pilot tested?                                                                            |                      |
| Repeat interviews                              | 18       | Were repeat interviews carried out? If yes, how many?                                                                                                    |                      |
| Audio/visual recording                         | 19       | Did the research use audio or visual recording to collect the data?                                                                                      |                      |
| Field notes                                    | 20       | Were field notes made during and/or after the interview or focus group?                                                                                  |                      |
| Duration                                       | 21       | What was the duration of the interviews or focus group?                                                                                                  |                      |
| Data saturation                                | 22       | Was data saturation discussed?                                                                                                                           |                      |
| Transcripts returned                           | 23       | Were transcripts returned to participants for comment and/or                                                                                             |                      |

| Topic                                  | Item No. | Guide Questions/Description                                                                                                        | Reported on Page No. |
|----------------------------------------|----------|------------------------------------------------------------------------------------------------------------------------------------|----------------------|
|                                        |          | correction?                                                                                                                        |                      |
| <b>Domain 3: analysis and findings</b> |          |                                                                                                                                    |                      |
| <i>Data analysis</i>                   |          |                                                                                                                                    |                      |
| Number of data coders                  | 24       | How many data coders coded the data?                                                                                               |                      |
| Description of the coding tree         | 25       | Did authors provide a description of the coding tree?                                                                              |                      |
| Derivation of themes                   | 26       | Were themes identified in advance or derived from the data?                                                                        |                      |
| Software                               | 27       | What software, if applicable, was used to manage the data?                                                                         |                      |
| Participant checking                   | 28       | Did participants provide feedback on the findings?                                                                                 |                      |
| <i>Reporting</i>                       |          |                                                                                                                                    |                      |
| Quotations presented                   | 29       | Were participant quotations presented to illustrate the themes/findings?<br>Was each quotation identified? e.g. participant number |                      |
| Data and findings consistent           | 30       | Was there consistency between the data presented and the findings?                                                                 |                      |
| Clarity of major themes                | 31       | Were major themes clearly presented in the findings?                                                                               |                      |
| Clarity of minor themes                | 32       | Is there a description of diverse cases or discussion of minor themes?                                                             |                      |

Developed from: Tong A, Sainsbury P, Craig J. Consolidated criteria for reporting qualitative research (COREQ): a 32-item checklist for interviews and focus groups. *International Journal for Quality in Health Care*. 2007. Volume 19, Number 6: pp. 349 – 357

**Once you have completed this checklist, please save a copy and upload it as part of your submission. DO NOT include this checklist as part of the main manuscript document. It must be uploaded as a separate file.**
