# Supplementary material for: Patient and public involvement to inform the protocol of a clinical trial comparing total hip arthroplasty with exercise: an exploratory qualitative case study
Source: PubMed Central journal article supplement — BMJ Open. 2023 Apr 24;13(4):e070866. doi: 10.1136/bmjopen-2022-070866 (PMC10151957; doi:10.1136/bmjopen-2022-070866), 2023-04-24
Supplement: bmjopen-2022-070866supp001.pdf [file bmjopen-2022-070866supp001.pdf]

**Online Supplementary File 1A. Interview guide for the patient group**

| <b>Topic</b>                                   | <b>Main question</b>                                                             | <b>Supplementary probing questions</b>                                                                                                                                                                                                                                                                                                                                                                                                                                                                                                                                                                                                                                                                                             |
|------------------------------------------------|----------------------------------------------------------------------------------|------------------------------------------------------------------------------------------------------------------------------------------------------------------------------------------------------------------------------------------------------------------------------------------------------------------------------------------------------------------------------------------------------------------------------------------------------------------------------------------------------------------------------------------------------------------------------------------------------------------------------------------------------------------------------------------------------------------------------------|
| Treatment for hip osteoarthritis (THA surgery) | What do you think about surgery as treatment for hip osteoarthritis?             | <ol style="list-style-type: none"> <li>1. When and why did you start considering surgery as a treatment option?</li> <li>2. How was the decision of surgery taken?</li> <li>3. When do you know when you are ready for surgery? (physically and mentally)</li> <li>4. How do you think the information was about the surgery, including risks and other treatments?</li> <li>5. What expectations do you have for the surgery?</li> <li>6. What do you consider to be the advantages of surgery?</li> <li>7. What do you consider to be the disadvantages of surgery?</li> <li>8. What is the main reason/motivation to undergo surgery? (or declining surgery)</li> </ol>                                                         |
| Treatment for hip osteoarthritis (exercise)    | What do you think about exercise as treatment for hip osteoarthritis?            | <ol style="list-style-type: none"> <li>9. What treatments have you otherwise tried before surgery? (type, systematics and durations)</li> <li>10. How have your experiences been with exercise? (type, systematic, duration and effect)</li> <li>11. How have your experiences been with other treatments? (effect)</li> <li>12. What do you consider to be the advantages of exercise?</li> <li>13. What do you consider to be the disadvantages of exercise?</li> </ol>                                                                                                                                                                                                                                                          |
| Participation in a clinical trial              | CASE DESCRIPTION<br>(Detailed information about the PROHIP trial)                | <ol style="list-style-type: none"> <li>14. What do you think about participating in a trial where you are randomly being assigned to surgery (total hip arthroplasty) or exercise (with the option of later surgery if needed)?</li> <li>15. What do you consider to be of importance to whether you would participate in the trial?</li> <li>16. What would affect your considerations about participating in the trial?</li> </ol>                                                                                                                                                                                                                                                                                               |
| Patient material and information               | How would you prefer to receive information about this trial?                    | <ol style="list-style-type: none"> <li>17. When do you think, it is best to present the information about the trial for potential participants?</li> <li>18. What do you think the patient information should contain?</li> </ol>                                                                                                                                                                                                                                                                                                                                                                                                                                                                                                  |
| Exercise protocol                              | If you were to participate in 12-weeks of exercise, how do think this should be? | <ol style="list-style-type: none"> <li>19. What do you think about resistance training in machines?</li> <li>20. What significance do the physical frames have for you? (location, duration, and environment) <ul style="list-style-type: none"> <li>• How many times a week is it possible for you to exercise?</li> <li>• How long would you spend on one training session?</li> </ul> </li> <li>21. What significance does it have for you, if you have to drive for the training sessions?</li> <li>22. What significance does it have for you whether a physiotherapist supervises the training sessions?</li> <li>23. How do you think you can continue to exercise on your own after a 12-week training program?</li> </ol> |

---

|          |                                                                                                                                       |                                                                                                                                                                                                                                                                                                                                                                                           |
|----------|---------------------------------------------------------------------------------------------------------------------------------------|-------------------------------------------------------------------------------------------------------------------------------------------------------------------------------------------------------------------------------------------------------------------------------------------------------------------------------------------------------------------------------------------|
| Outcomes | If we were to measure the effect of your surgery/exercise program – What do you consider is the most important thing to measure upon? | 24. What else do you think is important to measure upon?<br>25. What is your main problem right now (due to hip osteoarthritis)?<br>26. How would you describe whether a surgery has been successful?<br>27. How would you describe whether an exercise program has been successful?<br>28. What do you think about the questionnaires you filled out? (Relevance, number of items, etc.) |
|----------|---------------------------------------------------------------------------------------------------------------------------------------|-------------------------------------------------------------------------------------------------------------------------------------------------------------------------------------------------------------------------------------------------------------------------------------------------------------------------------------------------------------------------------------------|

---

**Online Supplementary File 1B. Interview guide for the clinician group**

| <b>Topic</b>                                | <b>Main question</b>                                                                                         | <b>Supplementary probing questions</b>                                                                                                                                                                                                                                                                                                                                                                                                                                                                                                                                                                                                                                                                                                                                                                                                                                                                                                                                           |
|---------------------------------------------|--------------------------------------------------------------------------------------------------------------|----------------------------------------------------------------------------------------------------------------------------------------------------------------------------------------------------------------------------------------------------------------------------------------------------------------------------------------------------------------------------------------------------------------------------------------------------------------------------------------------------------------------------------------------------------------------------------------------------------------------------------------------------------------------------------------------------------------------------------------------------------------------------------------------------------------------------------------------------------------------------------------------------------------------------------------------------------------------------------|
| Treatment for hip osteoarthritis (surgery)  | What do you think about surgery as treatment for hip osteoarthritis?                                         | <ol style="list-style-type: none"> <li>1. How do you experience the patients' perception of surgery (THA) as treatment for hip osteoarthritis?</li> <li>2. What do you experience patients with hip osteoarthritis indicate as main reason/motivation to undergo surgery?</li> <li>3. What do you consider to be the advantages of surgery?</li> <li>4. What do you consider to be the disadvantages of surgery?</li> <li>5. When do you think a patient with hip osteoarthritis is eligible for a THA?</li> </ol>                                                                                                                                                                                                                                                                                                                                                                                                                                                               |
| Treatment for hip osteoarthritis (exercise) | What do you think about exercise as treatment for hip osteoarthritis?                                        | <ol style="list-style-type: none"> <li>6. How do you experience the patients' perception of exercise as treatment for hip osteoarthritis?</li> <li>7. What do you experience patients with hip osteoarthritis indicate as main reason/motivation in choosing exercise rather than surgery?</li> <li>8. What do you consider to be the advantages of exercise?</li> <li>9. What do you consider to be the disadvantages of exercise?</li> <li>10. When do you think a patient with hip osteoarthritis should try exercise instead of getting a THA?</li> <li>11. How do you interpret the results of this trial?<sup>20</sup></li> <li>12. How have you experienced the debate on surgery (total knee arthroplasty) and exercise?</li> <li>11. How do you think this debate affects the patients?</li> <li>12. What do you consider to be the advantages of this debate?</li> <li>13. What do you consider to be disadvantages of this debate?</li> </ol>                         |
| Participation in a clinical trial           | <p>CASE DESCRIPTION</p> <p>(Detailed information about the PROHIP trial)</p>                                 | <ol style="list-style-type: none"> <li>14. What is your perception of a trial, in which patients are randomly assigned to surgery (THA) or exercise (with the option of later surgery if needed)?</li> <li>15. What challenges do you consider there are in recruiting for a trial, in which patients are randomized to THA or resistance training?</li> <li>16. How do you think it is ensured that clinician (e.g. orthopedic surgeons, physiotherapists, and nurses) do not color the patients' decision to participate?</li> <li>17. How are orthopedic surgeons and physiotherapists motivated to participate in the trial?</li> <li>18. How is collaboration between surgeons and physiotherapists in relation to the project created?</li> <li>19. How would you conduct the screening and recruitment procedure in this trial?</li> <li>20. What do you consider as of importance for whether patients with hip osteoarthritis will participate in the study?</li> </ol> |
| Patient material and information            | How do you think the patient information regarding the trial should be presented for potential participants? | <ol style="list-style-type: none"> <li>21. When do you think, it is best to present the information about the trial for potential participants?</li> </ol>                                                                                                                                                                                                                                                                                                                                                                                                                                                                                                                                                                                                                                                                                                                                                                                                                       |

---

|                   |                                                                                                 |                                                                                                                                                                                                                                                                                                                                                                                                                               |
|-------------------|-------------------------------------------------------------------------------------------------|-------------------------------------------------------------------------------------------------------------------------------------------------------------------------------------------------------------------------------------------------------------------------------------------------------------------------------------------------------------------------------------------------------------------------------|
| Exercise protocol | How do you think the exercise intervention should be conducted in the trial?                    | 22. What exercises do you think are relevant to include in the exercise program?<br>23. How long do you think one training session should last?<br>24. How do you think we will get the patients to continue to exercise after the 12-week intervention period?                                                                                                                                                               |
| Outcomes          | Which outcome do you consider to be the primary to measure in patients with hip osteoarthritis? | 25. Which secondary outcomes do you consider to be important to measure in patients with hip osteoarthritis?<br>26. What do you experience patients with hip osteoarthritis indicate as being the primary problem (symptoms/limitations) that is of importance to the treatment?<br>27. How would you describe whether surgery (THA) has been successful?<br>28. How would you describe whether exercise has been successful? |

---

**Online Supplementary File 1C. Interview guide for the decision maker group**

| <b>Topic</b>                                | <b>Main question</b>                                                                                                           | <b>Supplementary probing questions</b>                                                                                                                                                                                                                                                                                                                                                                                                                                                                                                                                                                                                                                                    |
|---------------------------------------------|--------------------------------------------------------------------------------------------------------------------------------|-------------------------------------------------------------------------------------------------------------------------------------------------------------------------------------------------------------------------------------------------------------------------------------------------------------------------------------------------------------------------------------------------------------------------------------------------------------------------------------------------------------------------------------------------------------------------------------------------------------------------------------------------------------------------------------------|
| Treatment for hip osteoarthritis (surgery)  | What do you think about surgery as treatment for hip osteoarthritis?                                                           | <ol style="list-style-type: none"> <li>1. How do you experience the patients' perception of surgery (THA) as treatment for hip osteoarthritis?</li> <li>2. What do you consider to be the advantages of surgery?</li> <li>3. What do you consider to be the disadvantages of surgery?</li> </ol>                                                                                                                                                                                                                                                                                                                                                                                          |
| Treatment for hip osteoarthritis (exercise) | What do you think about exercise as treatment for hip osteoarthritis?                                                          | <ol style="list-style-type: none"> <li>4. How do you experience the patients' perception of exercise as treatment for hip osteoarthritis?</li> <li>5. What do you consider to be the advantages of exercise?</li> <li>6. What do you consider to be the disadvantages of exercise?</li> <li>7. How do you interpret the results of this trial?<sup>20</sup></li> <li>8. How do you think we can avoid this trial to encounter similar diverse attitudes from the "media"/colleagues?</li> <li>9. How have you experienced the debate on surgery and exercise?</li> </ol>                                                                                                                  |
| Participation in a clinical trial           | CASE DESCRIPTION<br><br>(Detailed information about the PROHIP trial)                                                          | <ol style="list-style-type: none"> <li>10. What is your perception of a trial, in which patients are randomly assigned to surgery (THA) or exercise (with the option of later surgery if needed)?</li> <li>11. What challenges do you consider there are in recruiting for a trial, in which patients are randomized to THA or resistance training?</li> <li>12. In case, the effect of resistance training is lower than surgery (THA), but withholds patients from undergoing surgery because the patients consider the non-surgical treatment as successful - how would you interpret the results?</li> <li>13. What ethical considerations do you think are in this trial?</li> </ol> |
| Patient material and information            | What do you think the patient information should contain?                                                                      | <ol style="list-style-type: none"> <li>14. How would you prefer to receive information about this trial? (Content and method)</li> <li>15. When do you think, it is best to present the information about the trial for potential participants?</li> </ol>                                                                                                                                                                                                                                                                                                                                                                                                                                |
| Implementation of findings                  | Which barriers and facilitators, do you think, affect the implementation of the results from the trial into clinical practice? | <ol style="list-style-type: none"> <li>16. What consequences do you think the trial may have politically in relation to the treatment of patients with hip osteoarthritis?</li> <li>17. What consequences do you think the trial may have on clinical practice?</li> <li>18. What challenges do you think there may be in implementing the results from the trial into clinical practice?</li> <li>19. Which factors do you think will be decisive for a successful implementation of the results from the trial into clinical practice?</li> <li>20. How do you think that we may optimize the implementation of the results from the trial into clinical practice?</li> </ol>           |
