# Supplementary figures and images for: Patient and public involvement to inform the protocol of a clinical trial comparing total hip arthroplasty with exercise: an exploratory qualitative case study
Source: PubMed Central journal article supplement — BMJ Open. 2023 Apr 24;13(4):e070866. doi: 10.1136/bmjopen-2022-070866 (PMC10151957; doi:10.1136/bmjopen-2022-070866), 2023-04-24

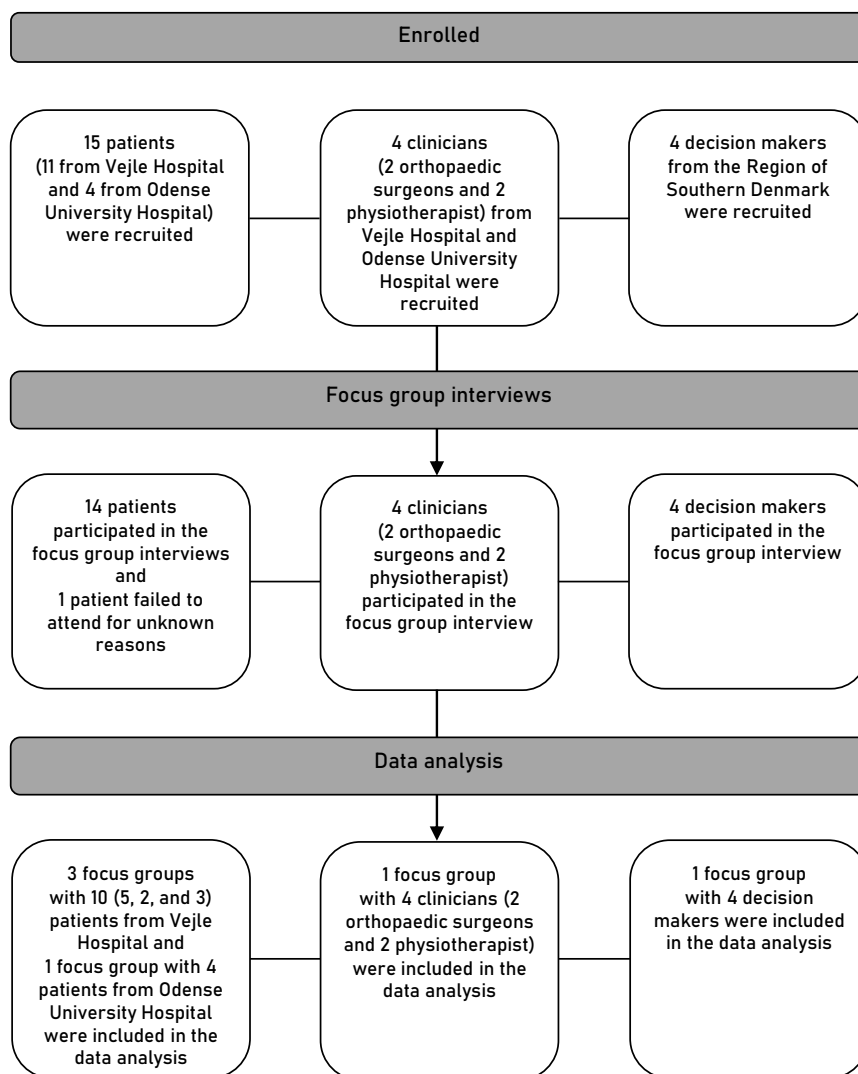

**Online Supplementary File 2.** Flowchart of key stakeholder participants in the study.

Supplement: bmjopen-2022-070866supp002.pdf [file bmjopen-2022-070866supp002.pdf]
